# Supplementary material for: Visible-light mediated directed perfluoroalkylation of hydrazones
Source: Royal Society of Chemistry journal article supplement (doi:10.1039/c7ob01144j), 2017-01-01

# Visible-Light mediated directed perfluoroalkylation of hydrazones

Heng Ji,<sup>‡ a, b</sup> Hui-qiong Ni,<sup>‡ a</sup> Peng Zhi,<sup>b</sup> Zi-wei Xi,<sup>b</sup> Wei Wang,<sup>c</sup> Jian-jun  
Shi<sup>\*a</sup> and Yong-miao Shen<sup>\*b</sup>

<sup>a</sup> School of Chemical Engineering, Anhui University of Science and Technology,  
Huainan, P. R. China

<sup>b</sup> Key Laboratory of Clean Dyeing and Finishing Technology of Zhejiang Province,  
School of Chemistry and Chemical Engineering, Shaoxing University, Shaoxing  
312000, China. E-mail: shenyongmiao@usx.edu.cn

<sup>c</sup> School of Chemical and Biological Engineering, Yancheng Institute of Technology,  
Yancheng, P. R. China

## Supporting Information

|                                                                                                  |       |
|--------------------------------------------------------------------------------------------------|-------|
| 1. General information.....                                                                      | S2    |
| 2. Photoreaction setup.....                                                                      | S2    |
| 3. Determination of the geometry of the C=N double bond.....                                     | S3    |
| 4. Stern-Volmer Fluorescence Quenching Studies.....                                              | S3    |
| 5. The Radical Trapping Experiment.....                                                          | S5    |
| 6. EPR spin trapping experiment with DMPO.....                                                   | S5    |
| 7. Synthetic Utility of Methodology.....                                                         | S5    |
| 8. <sup>1</sup> H NMR, <sup>13</sup> C NMR and <sup>19</sup> F NMR of compounds <b>3-9</b> ..... | S6-59 |

## 1. General information

All reagents were commercially available and used without further purification. All solvents were dried according to standard procedures. Melting points were measured on a Taikex X-4 microscopic melting point apparatus and are uncorrected.  $^1\text{H}$  and  $^{13}\text{C}$  NMR spectra were measured on a Bruker ACF-400 spectrometer and recorded at 400 and 100 MHz, respectively, using  $\text{CDCl}_3$  or DMSO as solvent. IR spectra were taken with a Nicolet FT-IR 5DX spectrometer. HRMS were taken with a AB Triple TOF 5600 plus System (AB SCIEX, Framingham, USA). The exact mass calibration was performed automatically before each analysis employing the Automated Calibration Delivery System. EPR spectra were measured on a Bruker A300 spectrometer.

## 2. Photoreaction setup

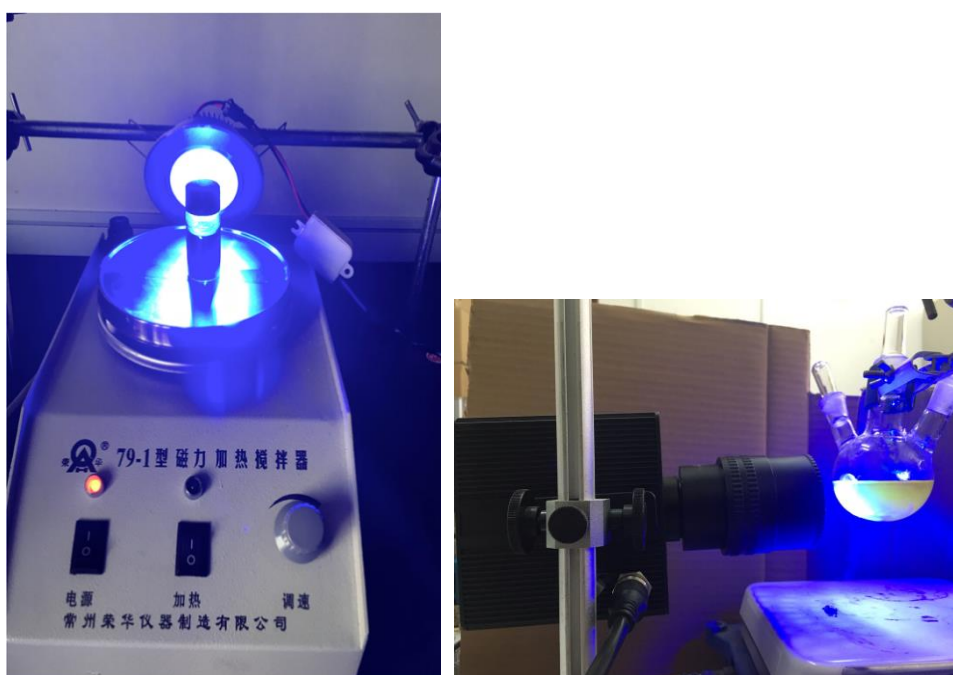

**Fig. 1s** Reaction apparatus for the small test reactions (left) and gram-scale reaction (right).

### 3. Determination of the geometry of the C=N double bond

NOESY experiment

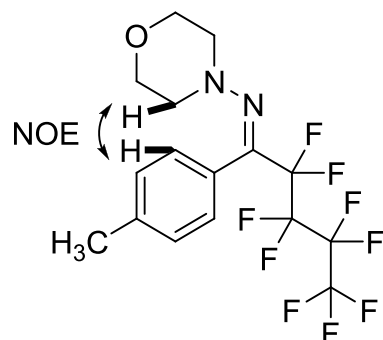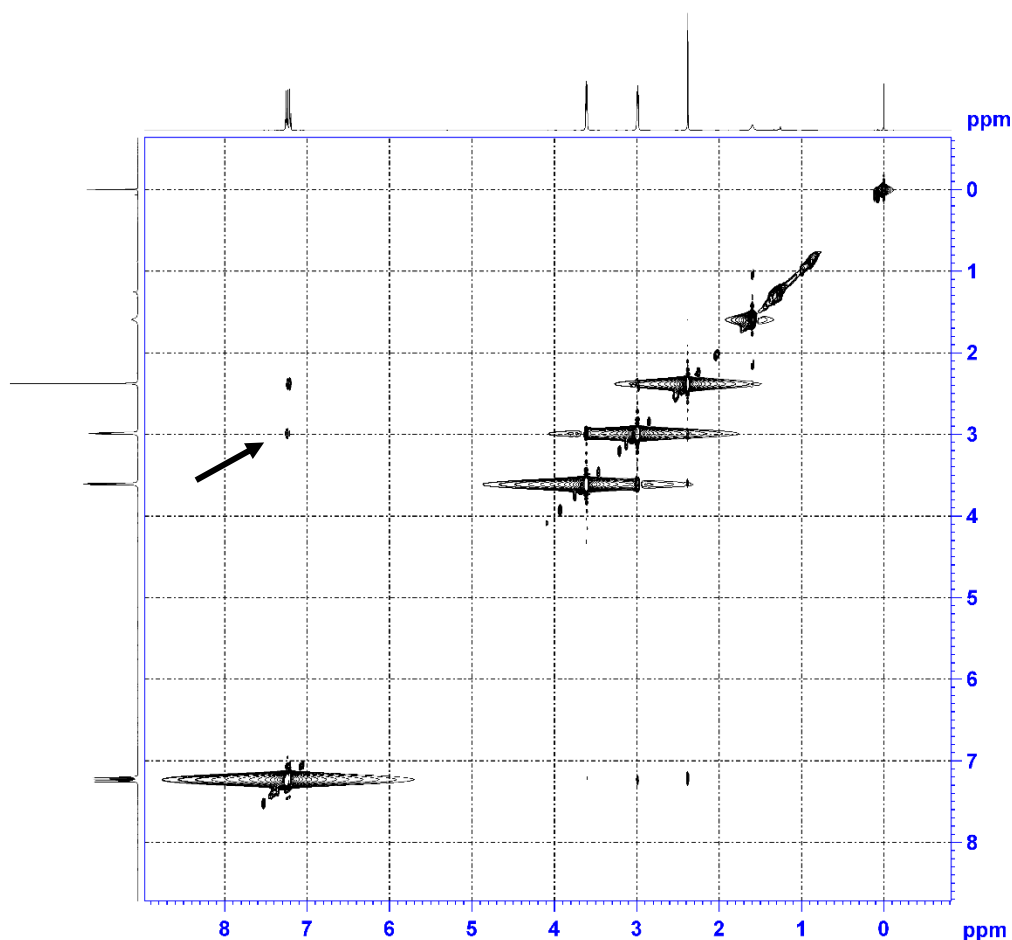

### 4. Stern-Volmer Fluorescence Quenching Studies

Fluorescence quenching experiments were performed on a JASCO FP-6500 Spectrofluorometer. In a typical experiment, a 0.15 mM solution of Ir(ppy)<sub>3</sub> in CH<sub>3</sub>CN was added to the appropriate amount of quencher in a screw-top 1.0 cm quartz cuvette. All solutions were excited at  $\lambda = 367$  nm (absorption maximum of the photocatalyst) and the emission intensity at 526 nm was recorded (emission maximum)

### Ir(ppy)<sub>3</sub> Emission Quenched by 1b

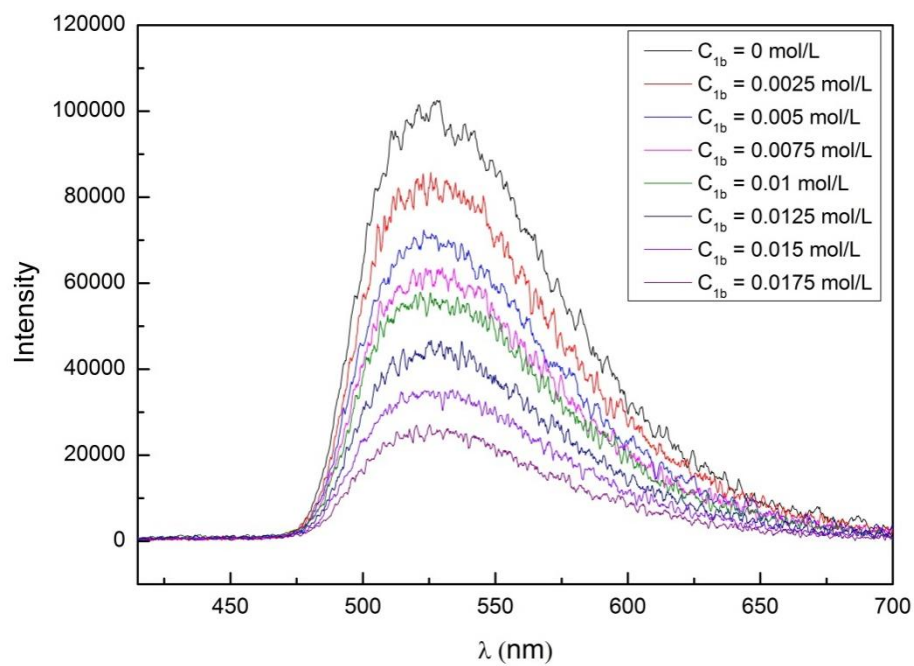

### Ir(ppy)<sub>3</sub> Emission Quenched by 2a

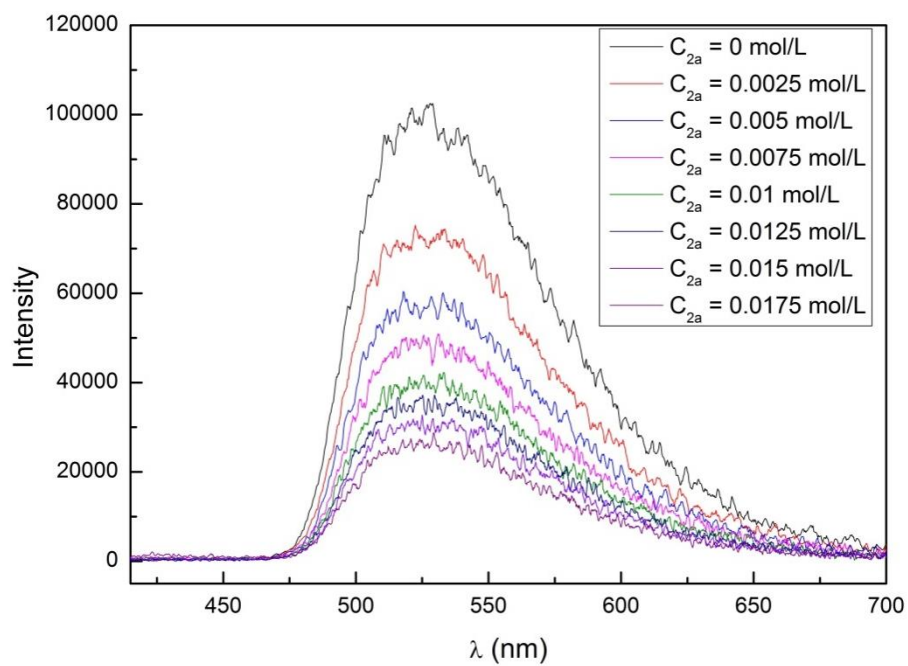

## 5. The Radical Trapping Experiment:

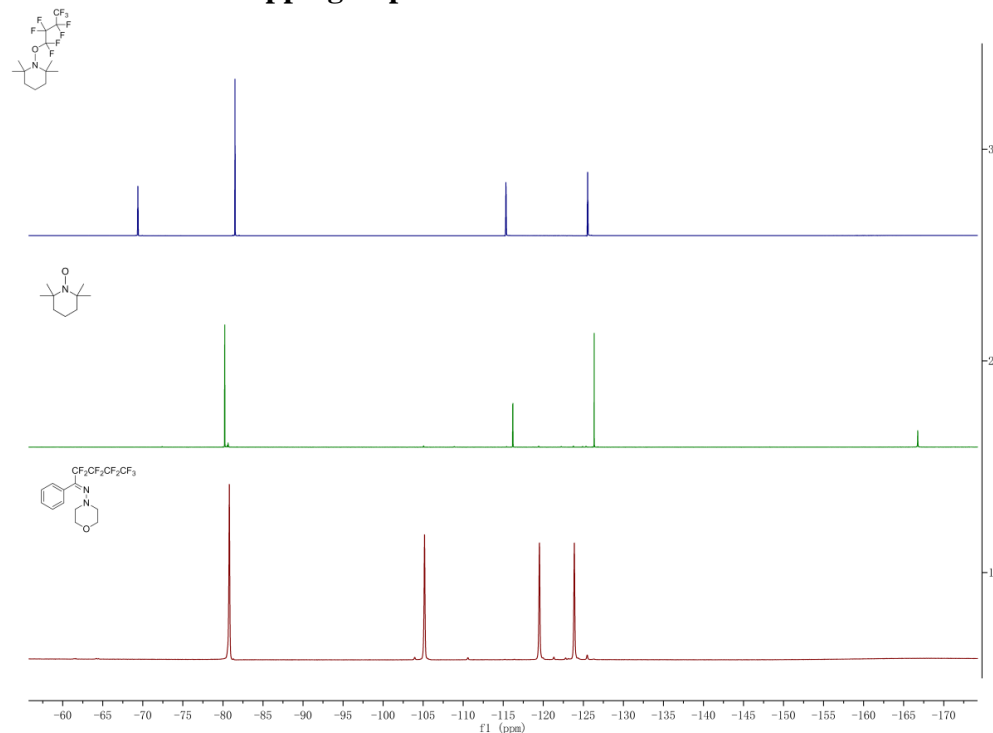

## 6. EPR spin trapping experiment with DMPO

Typical spectrometer parameters are shown as follows: Center-Field: 3508 G; Width: 100 G; Receiver Gain:  $5.02 \times 10^3$ ; Scans: 1; Modulation Amplitude: 1 G; Modulation Frequency: 9.845957 GHz; Microwave Power: 2.41mW; Time constant: 0.08192 s. Simulated EPR spectrum (b and c) based on hyperfine coupling constants of  $a_N = 13.52$  Gs and  $a_F = 1.96$  Gs ( $g=2.00948$ ).

## 7. Synthetic Utility of Methodology

(1) Hydrolysis reaction of hydrazone

**3b** (0.1085 g, 0.2569 mmol) was added to a 7.5mL 1/1 mixture of HCl (0.3N)/THF. The resulting solution was stirred at room temperature and monitored by TLC. After 24h, the solution was extracted by DCM and washed with aq NaHCO<sub>3</sub>. The organic layer was dried over MgSO<sub>4</sub> and concentrated. The residue was purified by flash chromatography to afford **9** (41 mg, 47 %).

(2) Photoredox three-component coupling reaction

In a vial Ir(ppy)<sub>3</sub> (2.6 mg, 0.004 mmol, 1 mol%), p-tolualdehyde(0.4 mmol), morpholin-4-amine (0.44 mmol), Na<sub>2</sub>HPO<sub>4</sub> (113.6mg, 0.8 mmol) and perfluoroalkyl iodide **2** (0.8 mmol) were dissolved in 8mL DMF. The reaction mixture was stirred under irradiation with a 3 W blue LED lamp for 24 hours. After the reaction was completed, the reaction mixture was poured into 60mL water and extracted with EtOAc (8 mL $\times$ 3). The combined organic layers were dried with anhydrous MgSO<sub>4</sub>. The solvent was removed under reduced pressure, and the crude mixture was directly charged on silica gel and purified by column chromatography with petroleum ether/ethyl acetate as eluents.

## 8. Spectral data of products 3-9

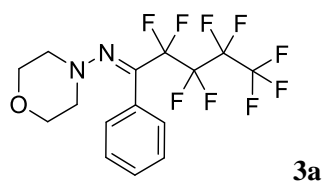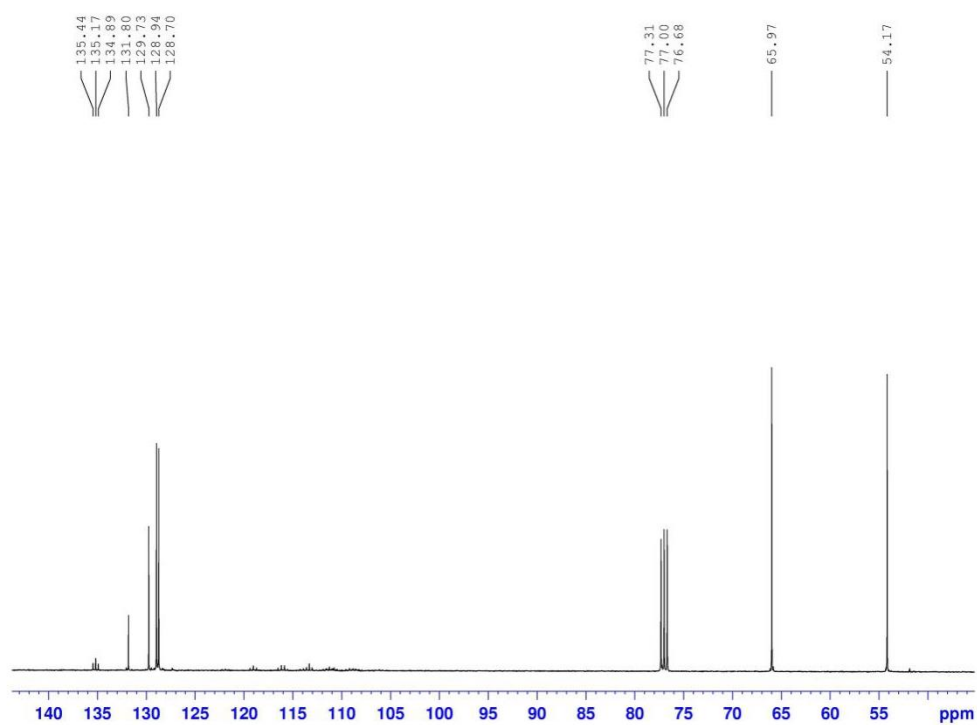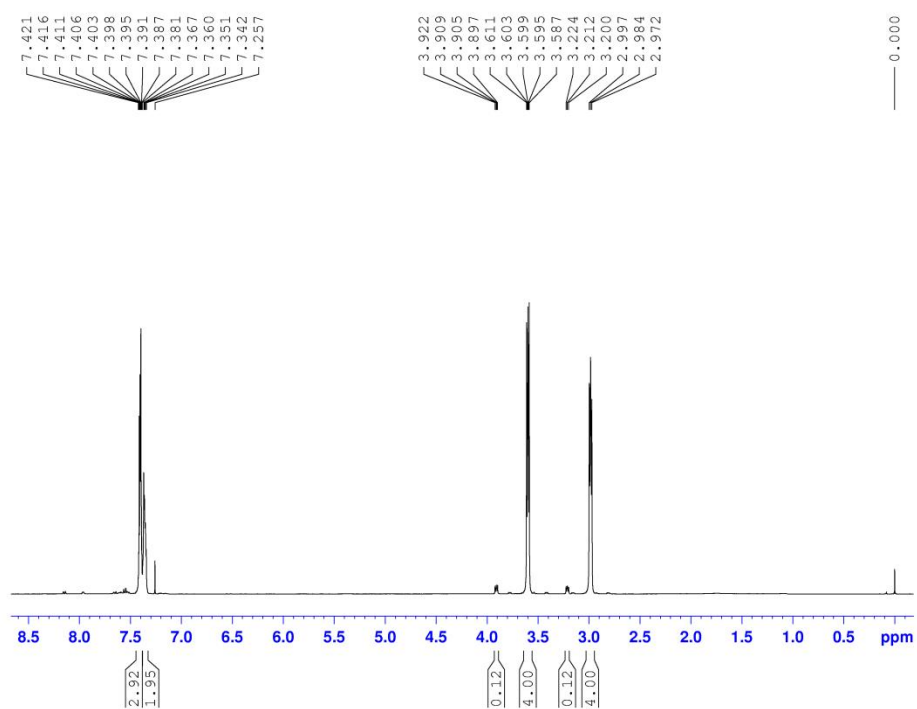

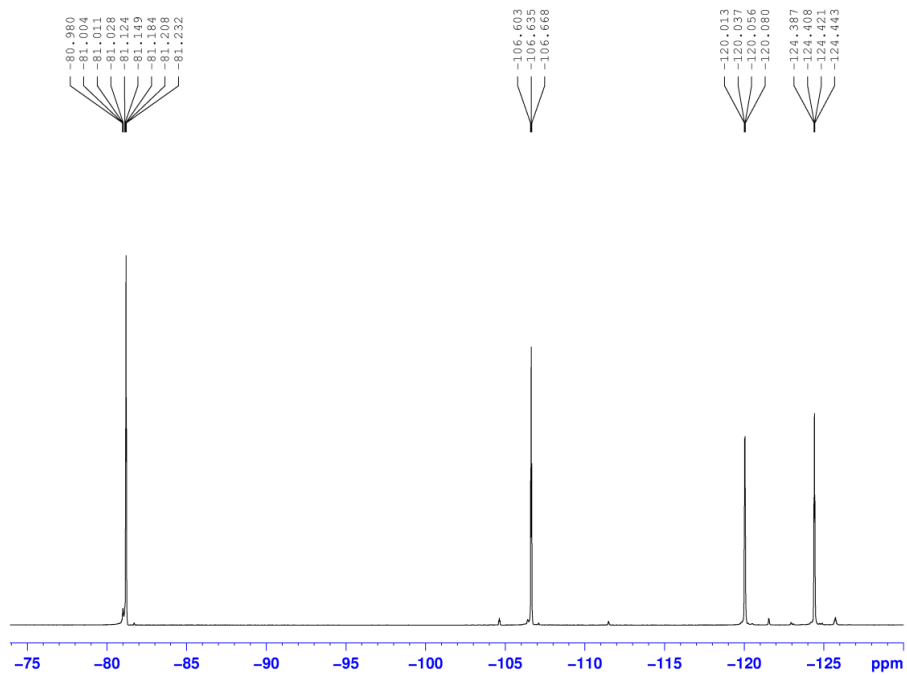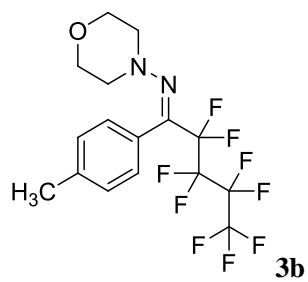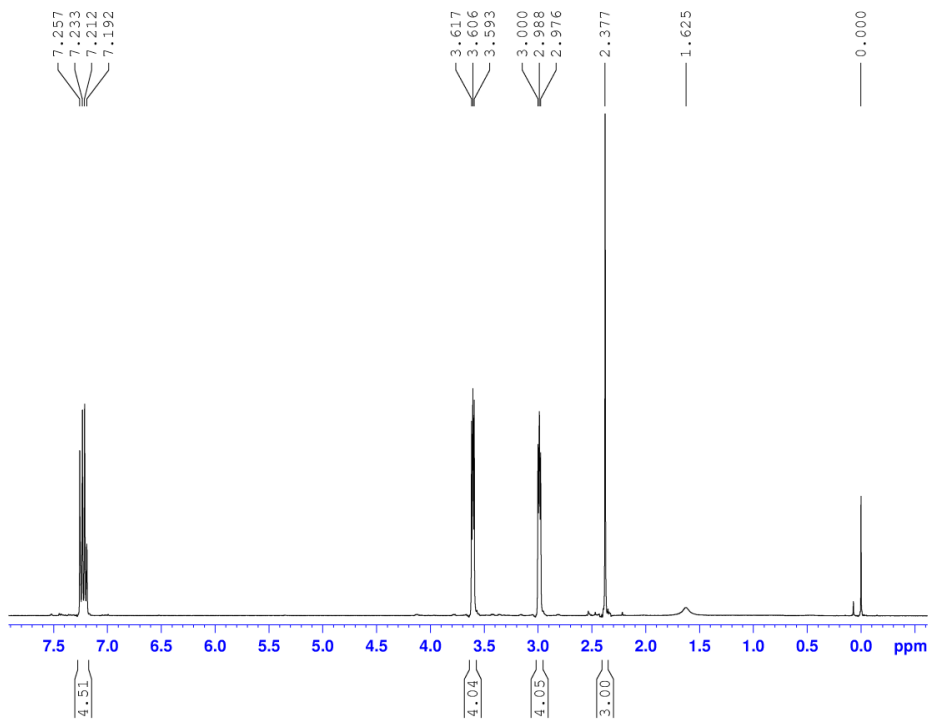

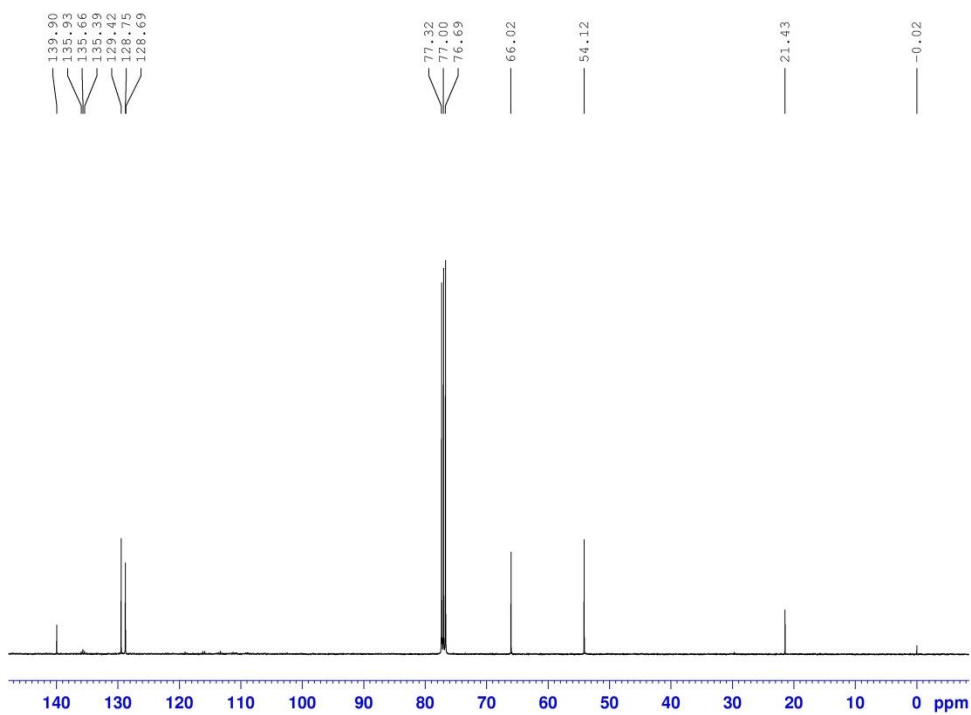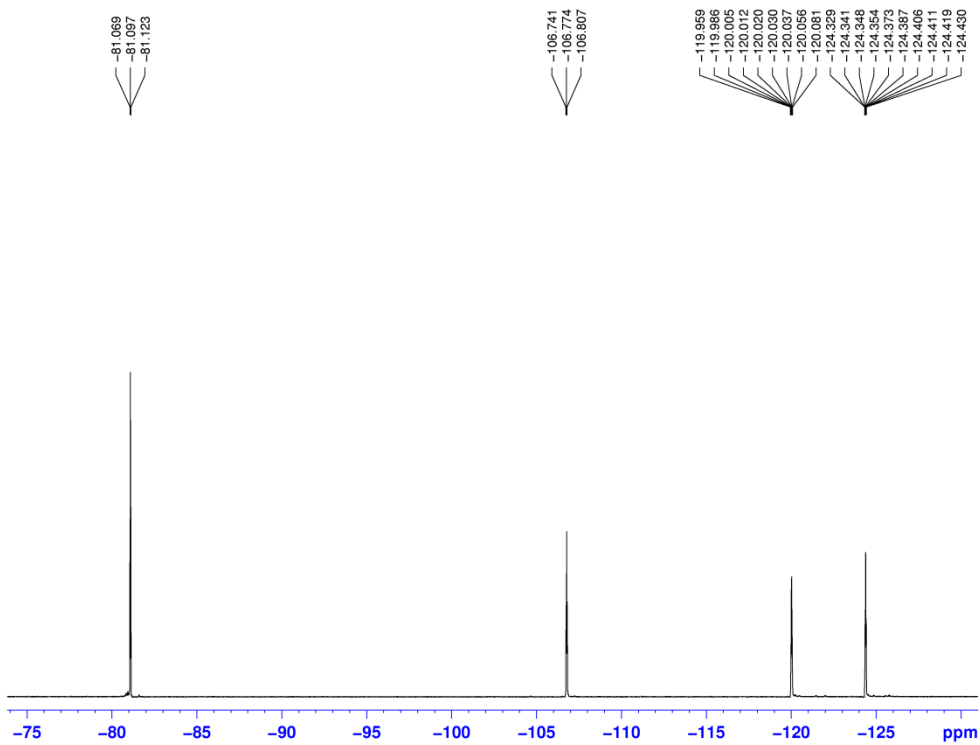



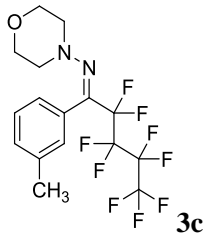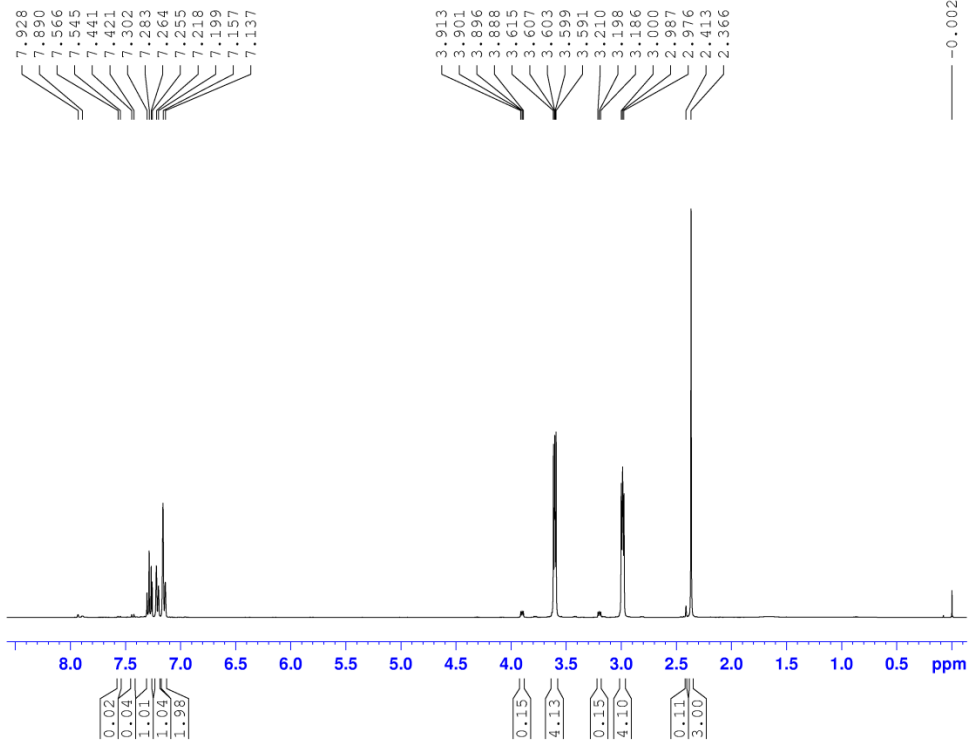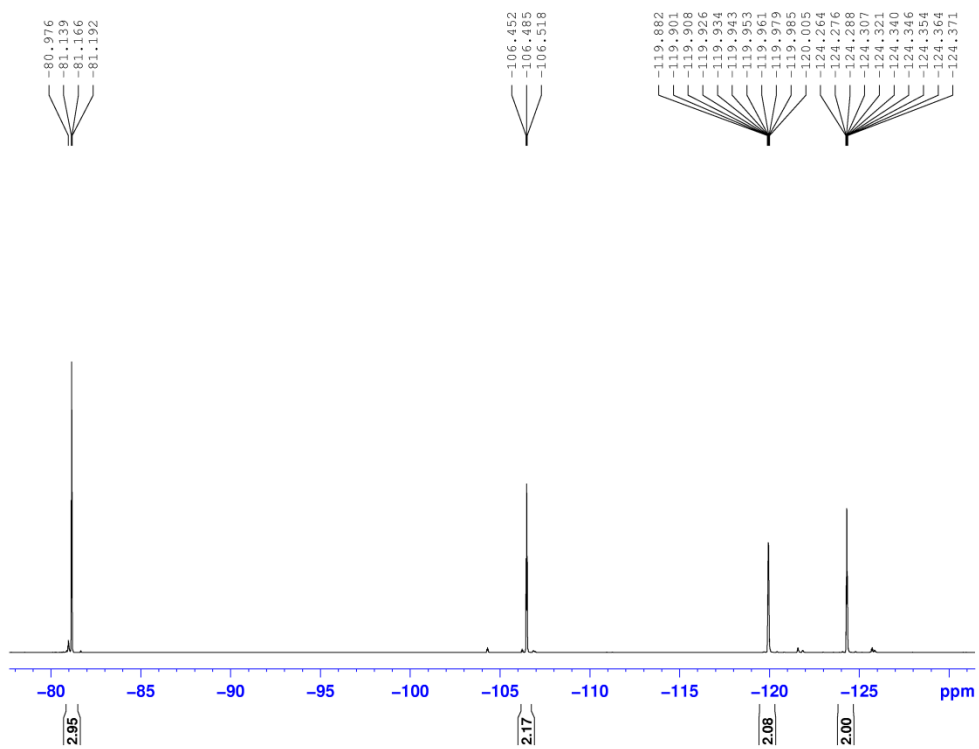

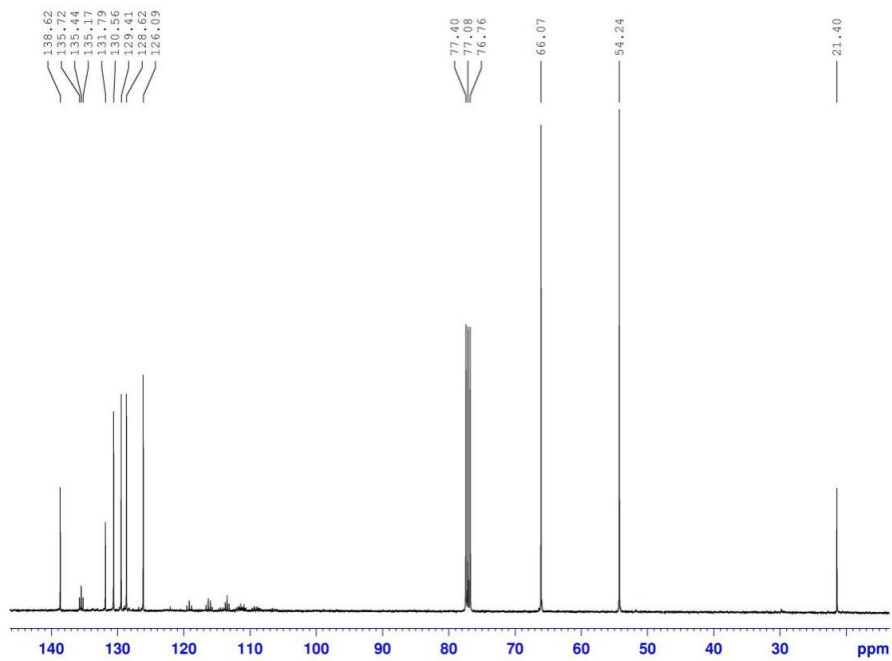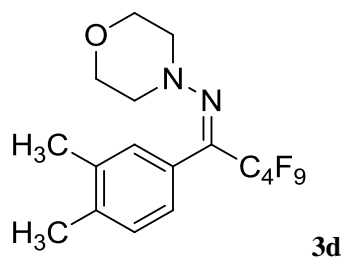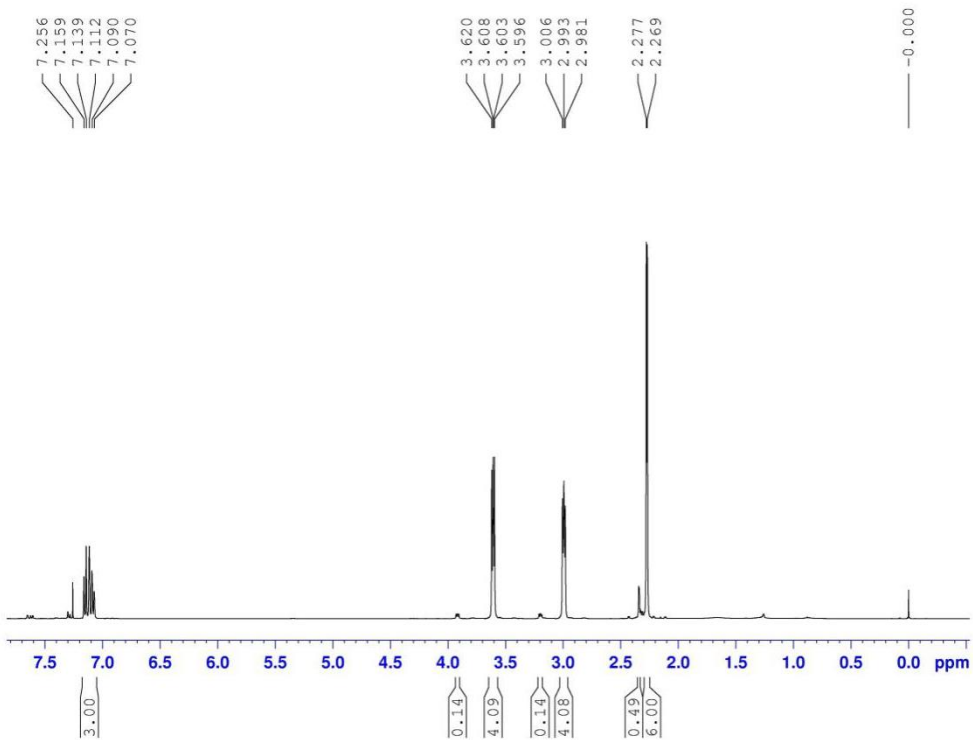

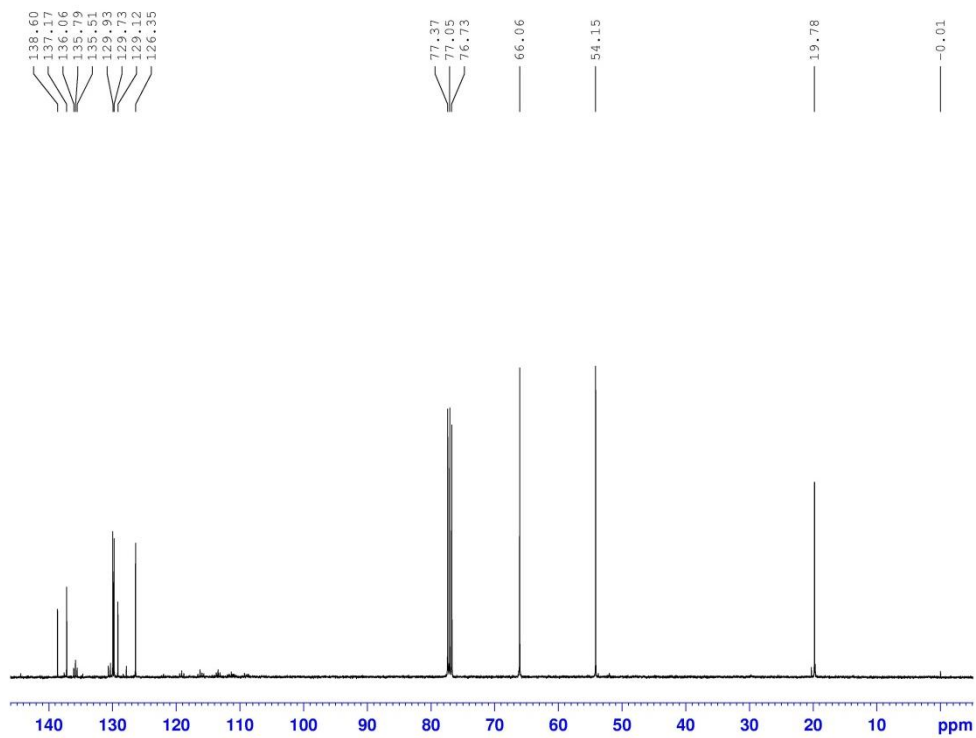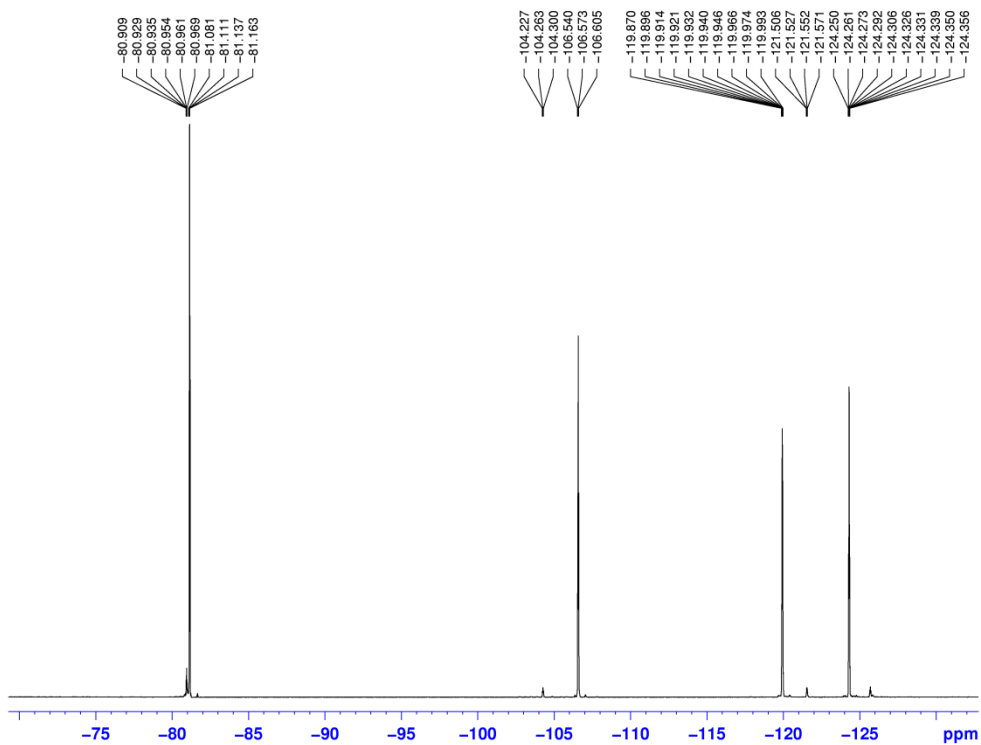

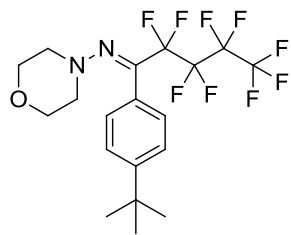

**3e**

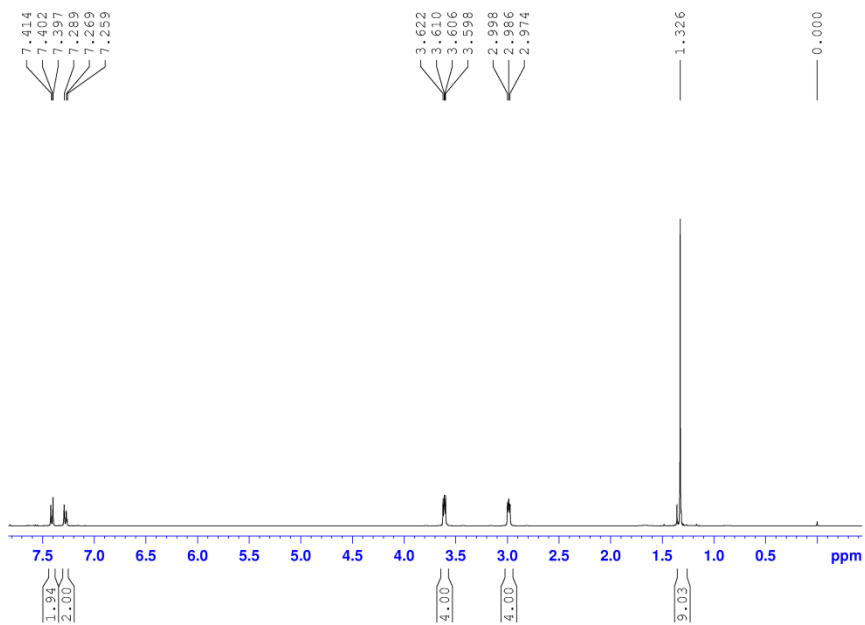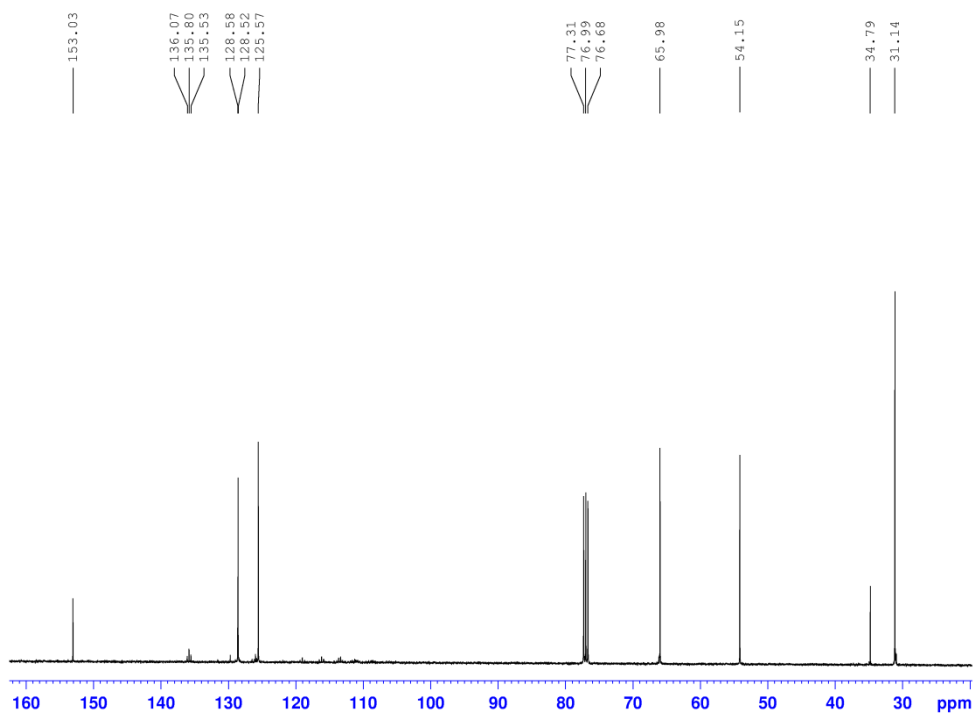

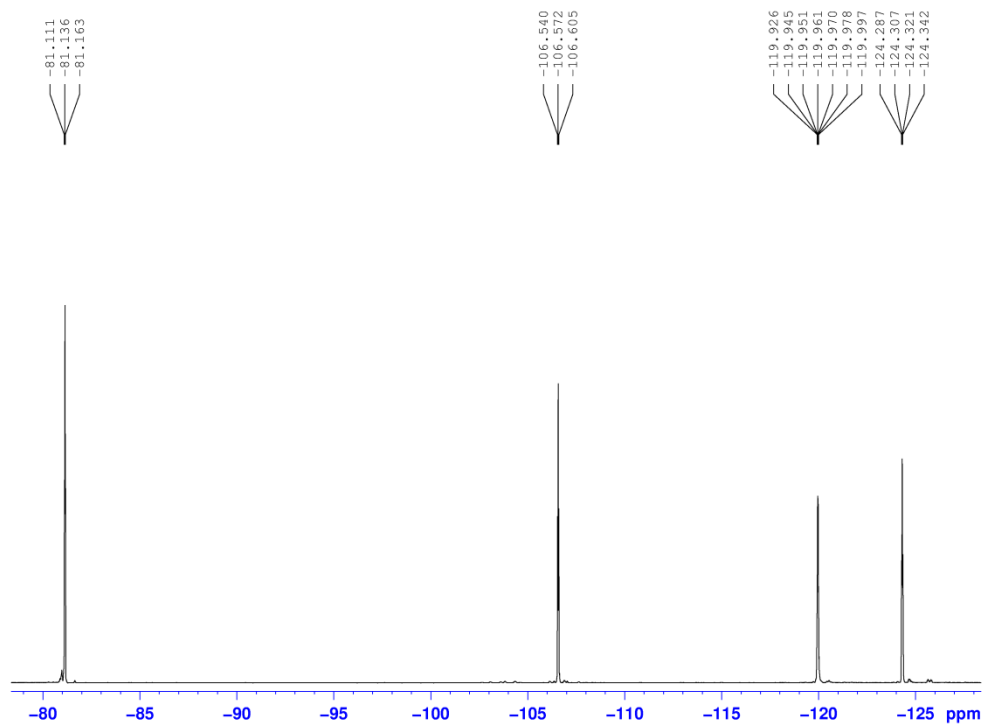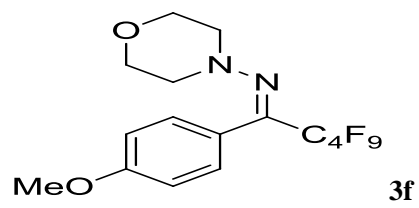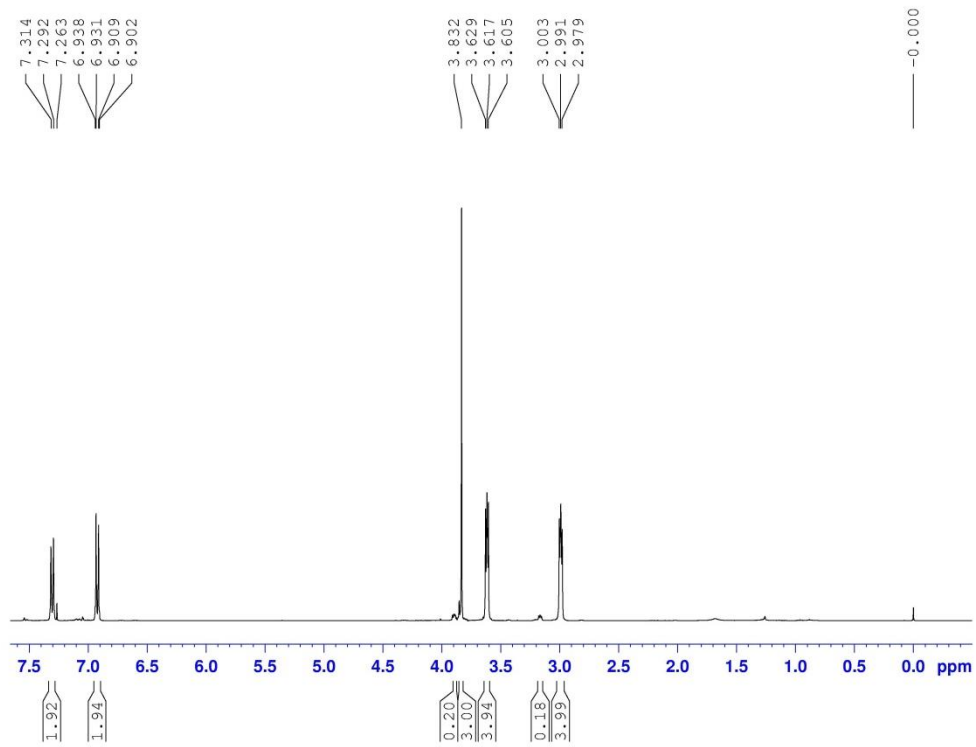

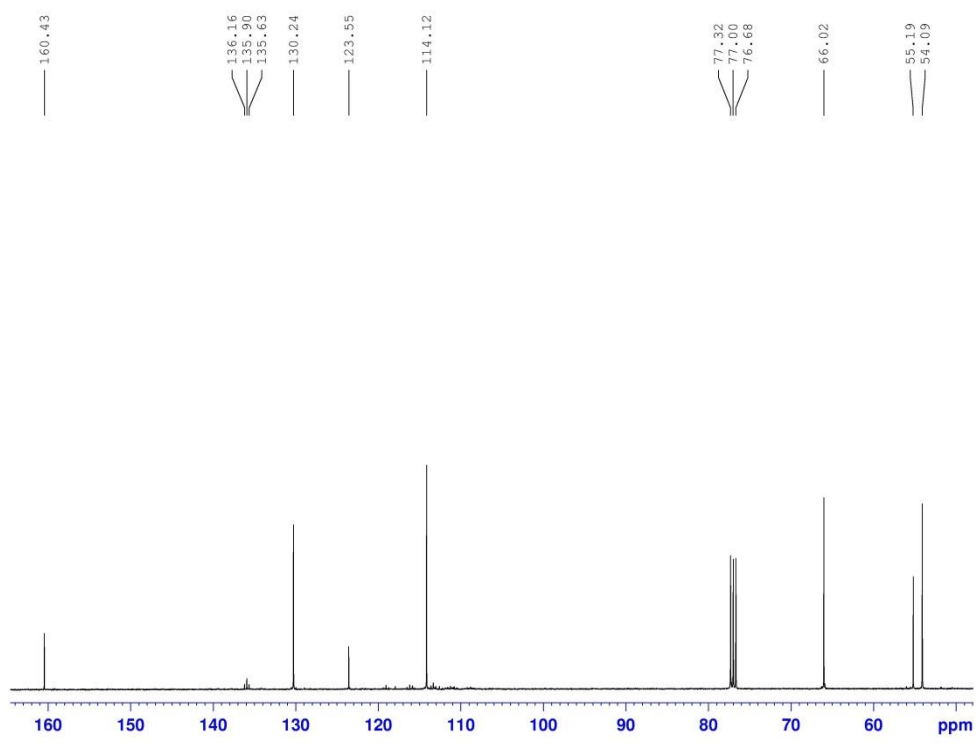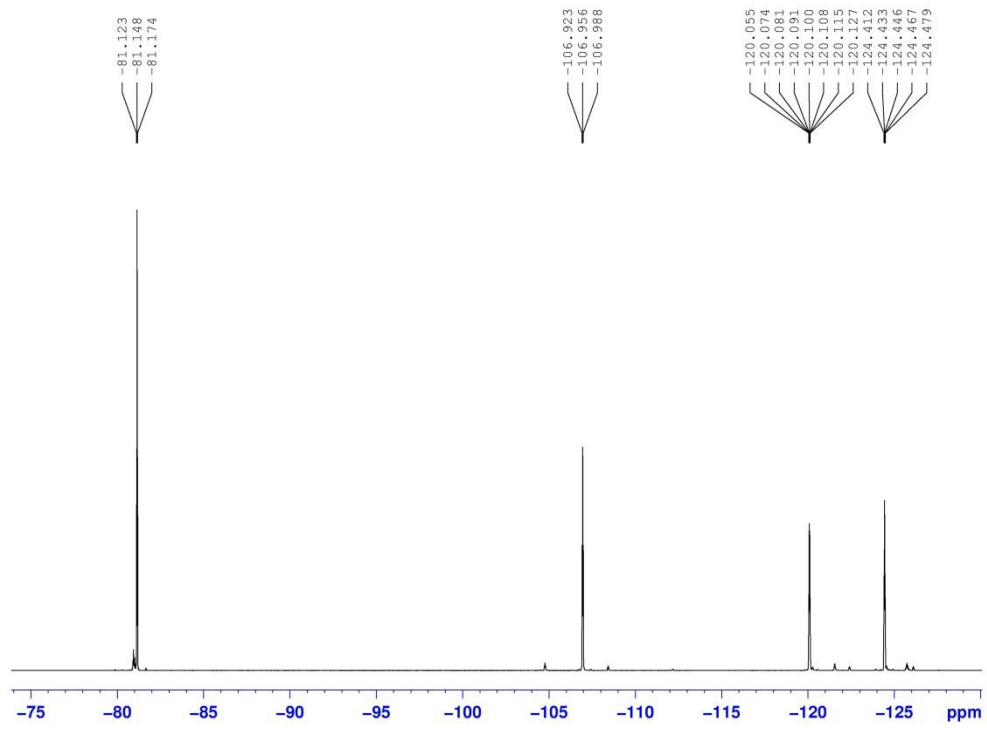

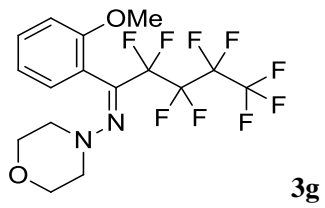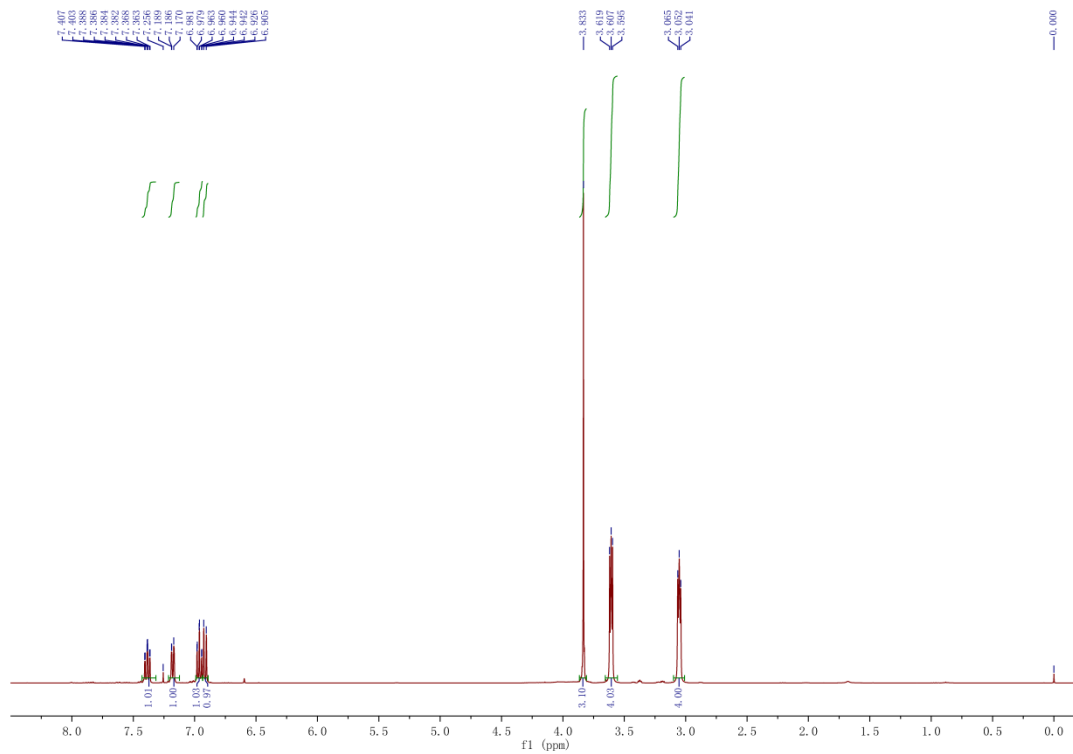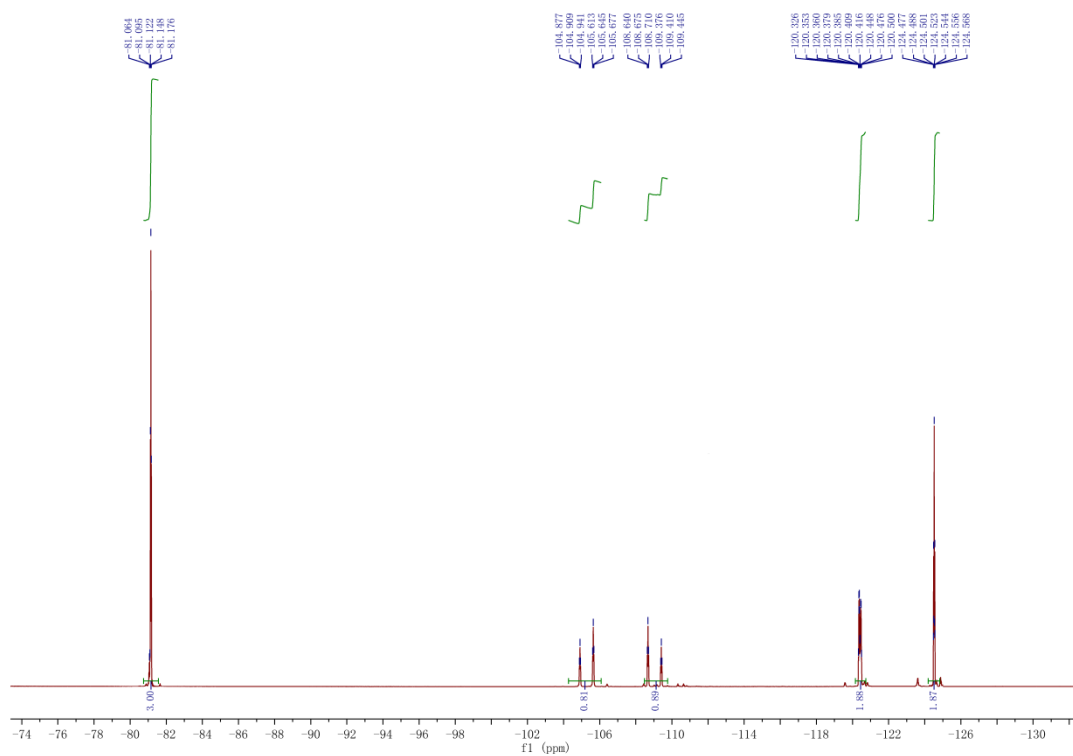

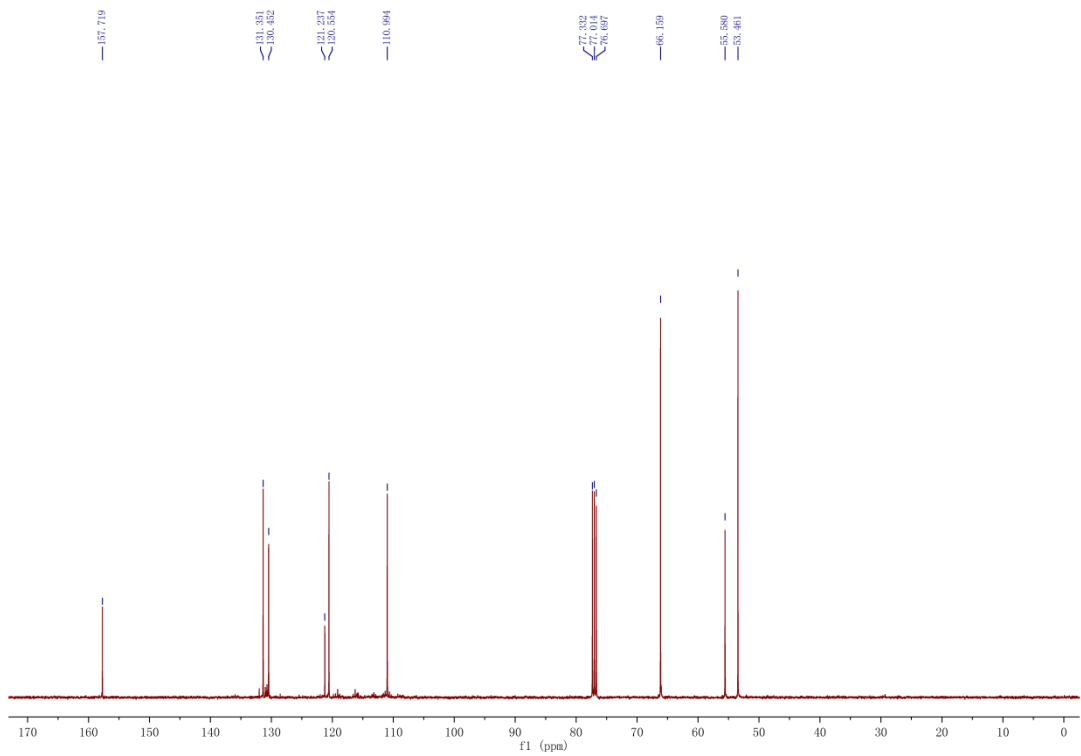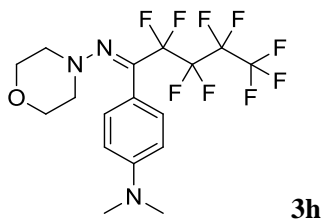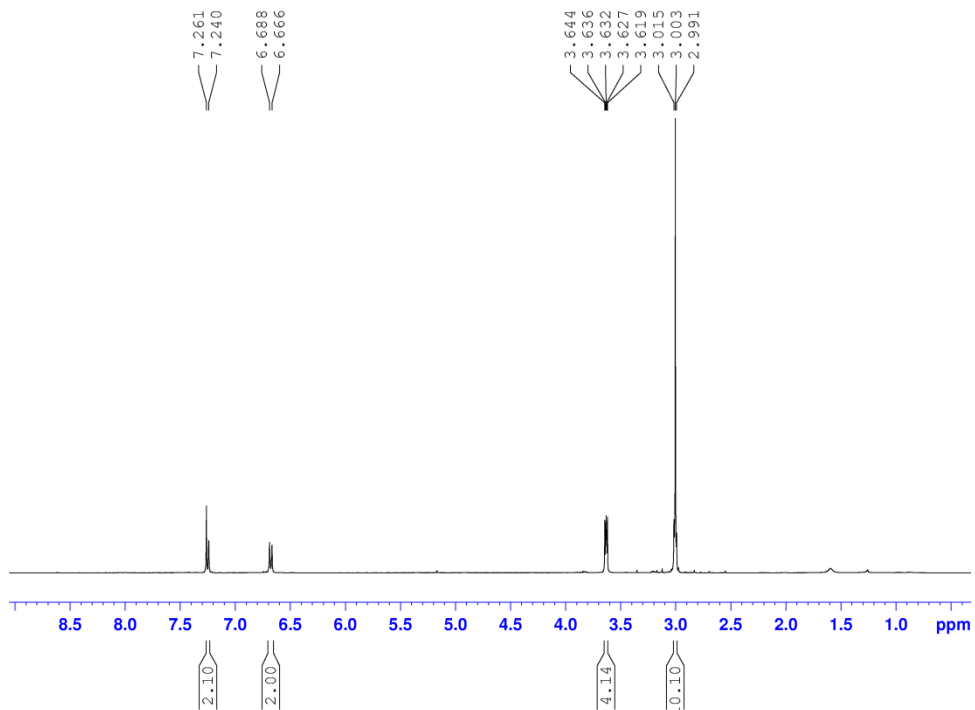



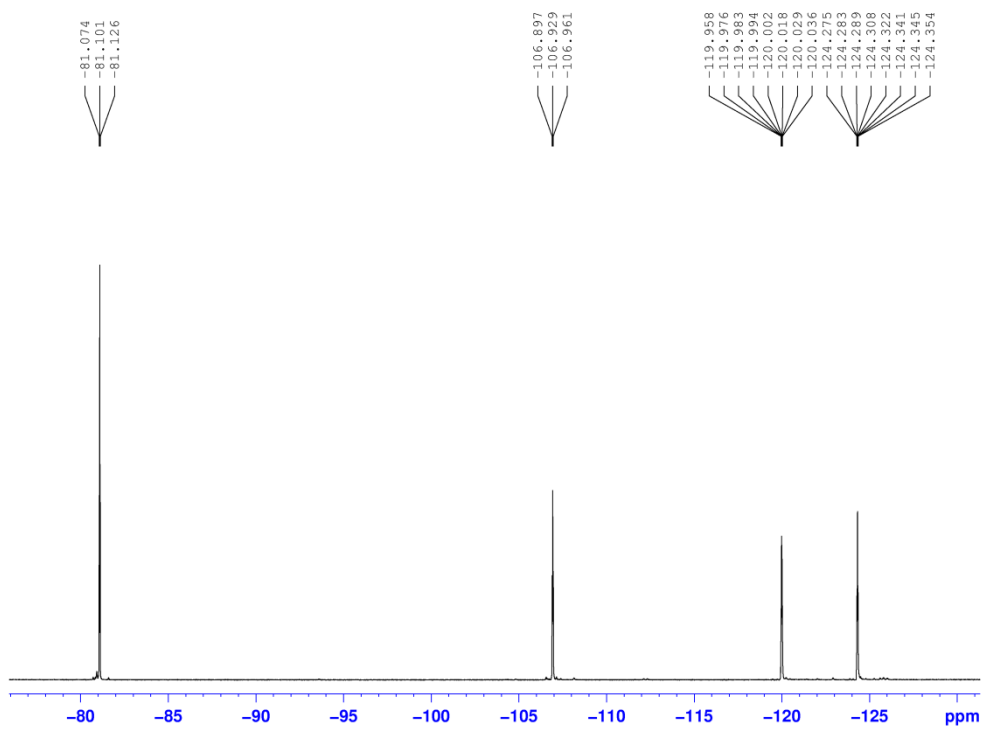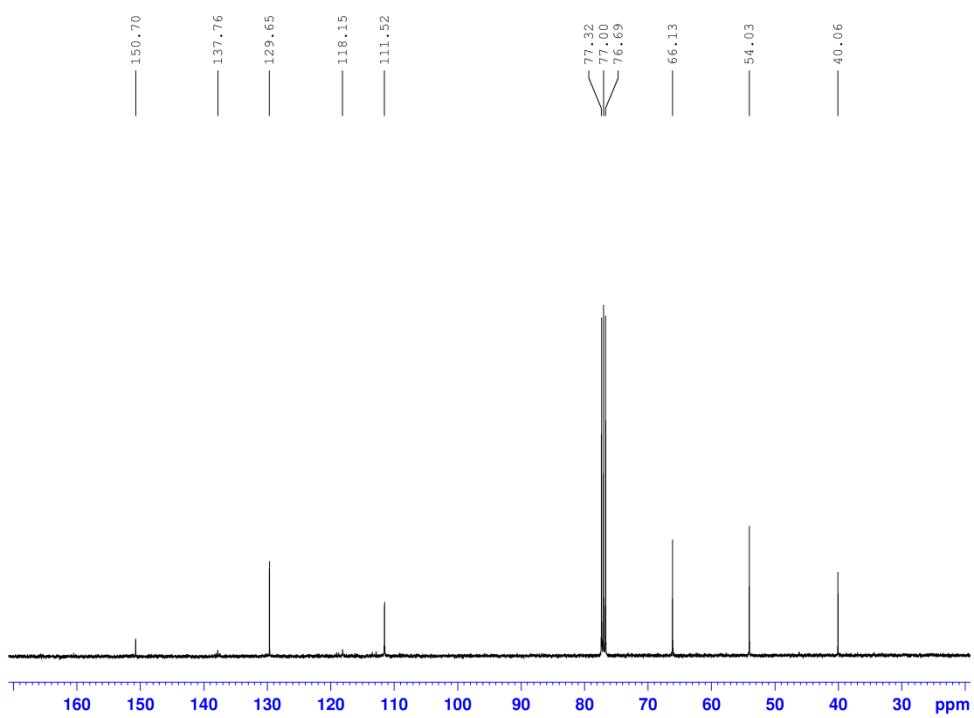

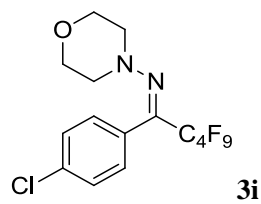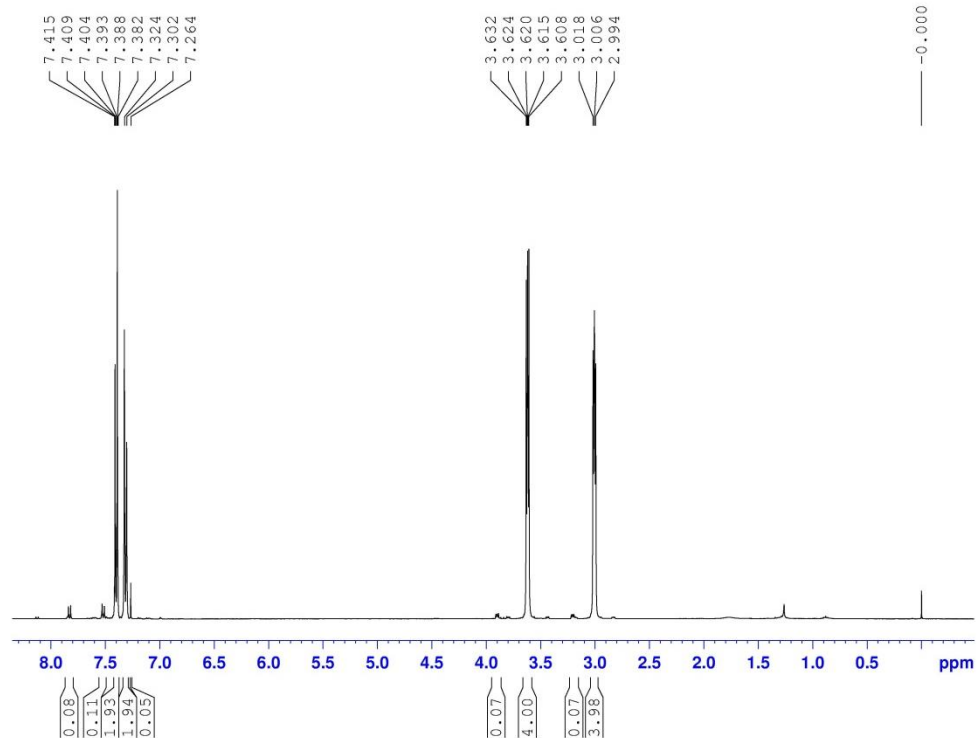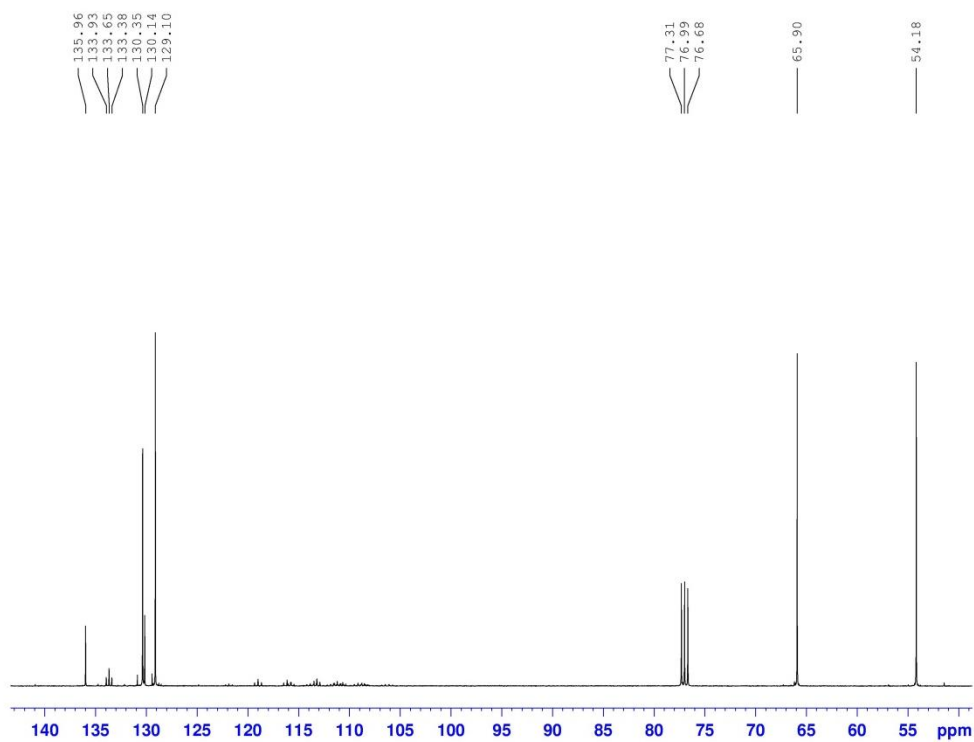

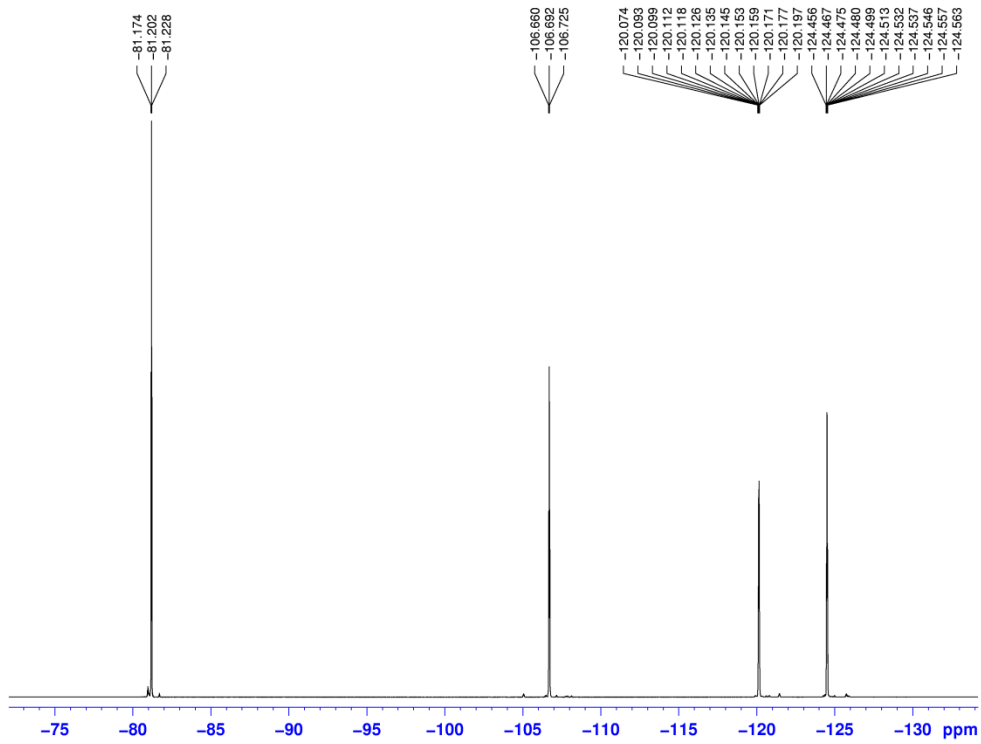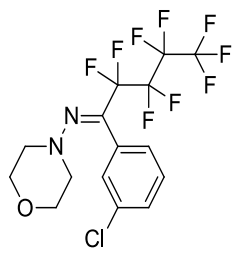

**3j**

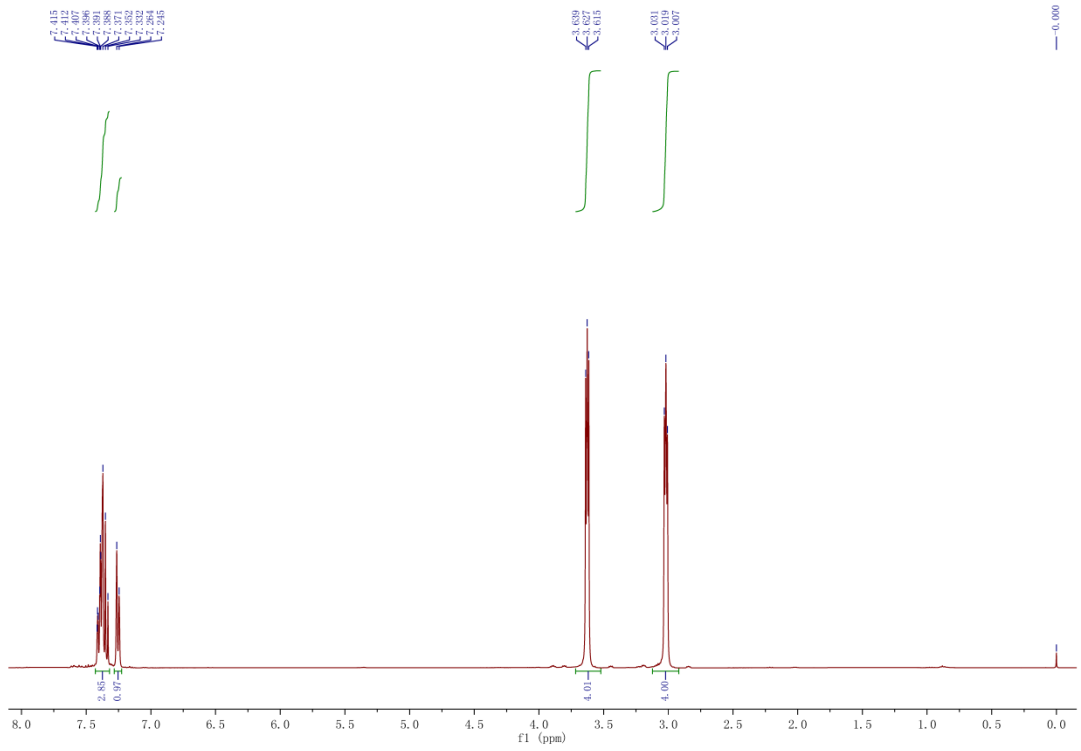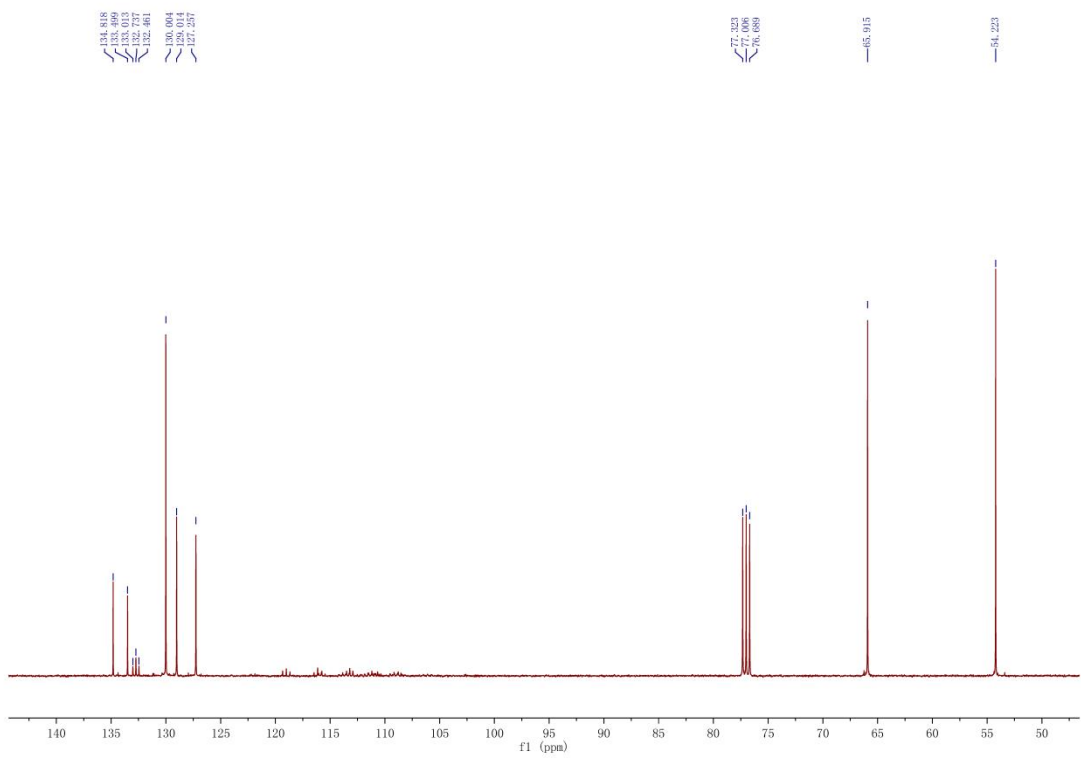

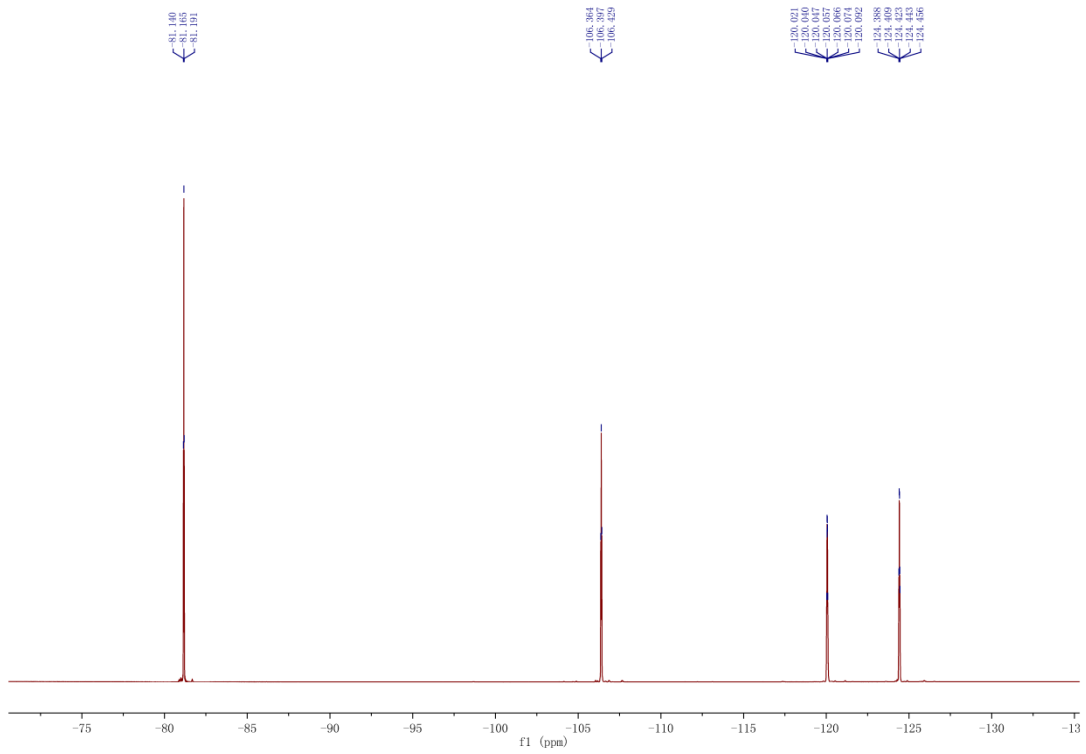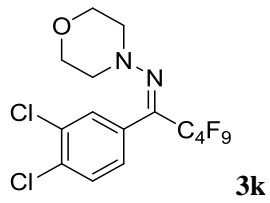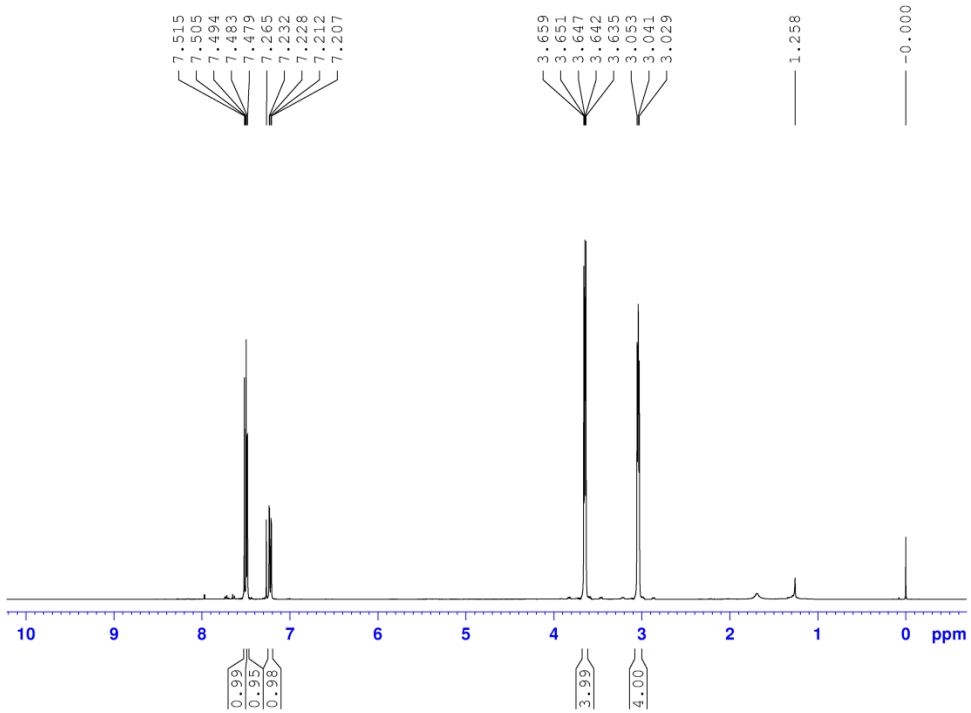

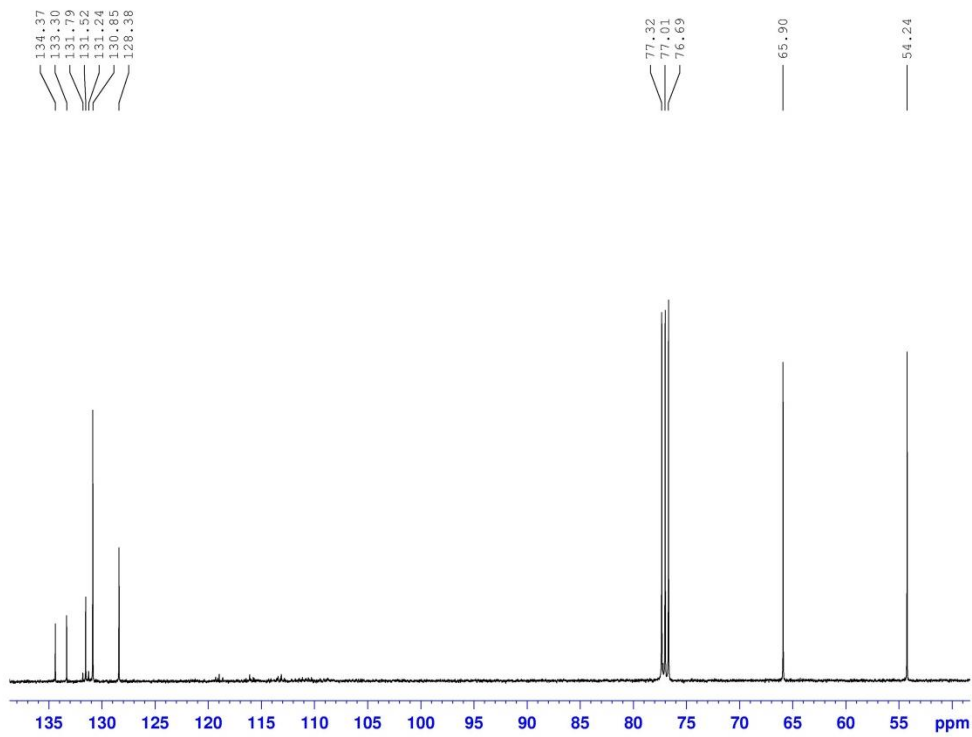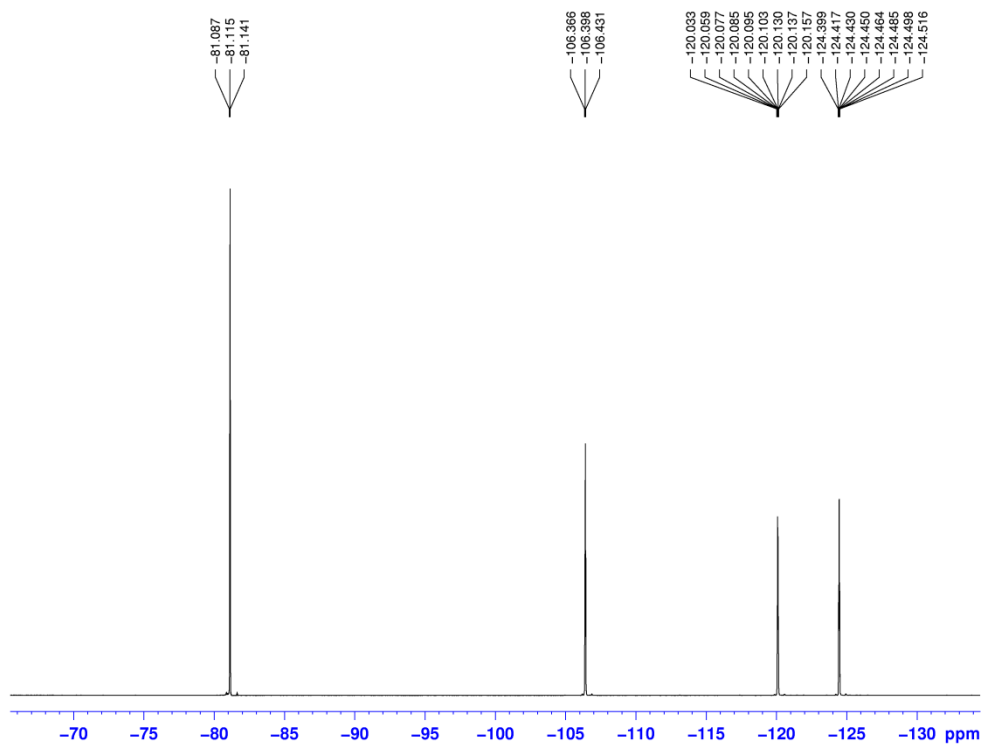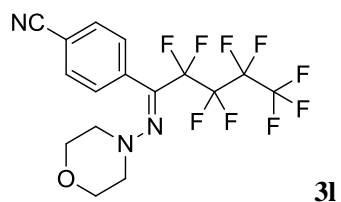

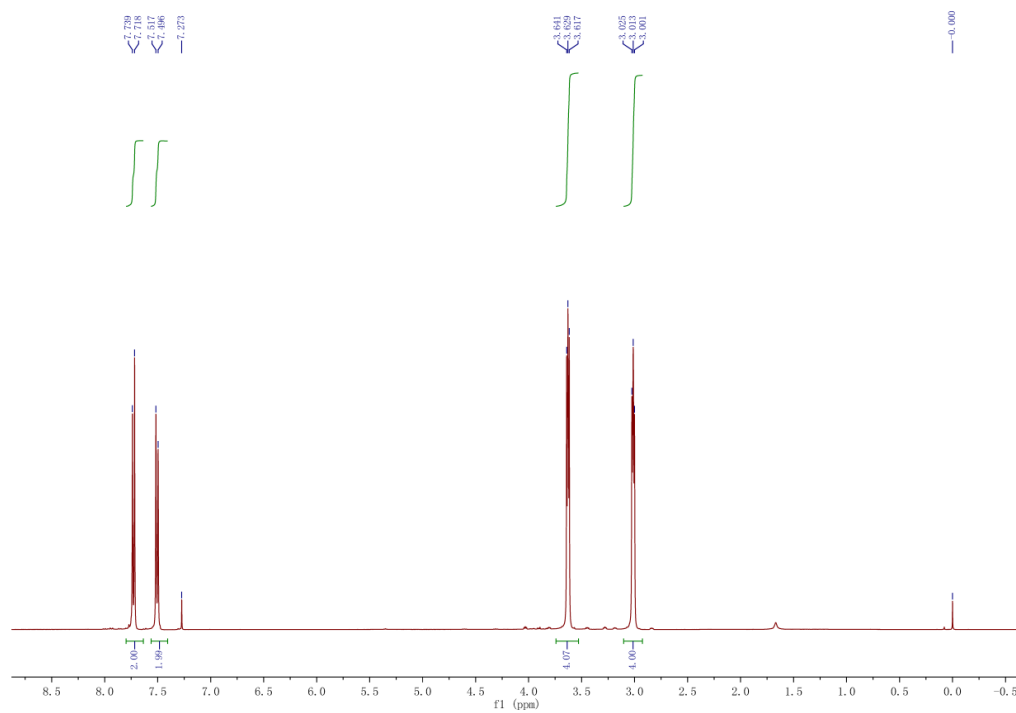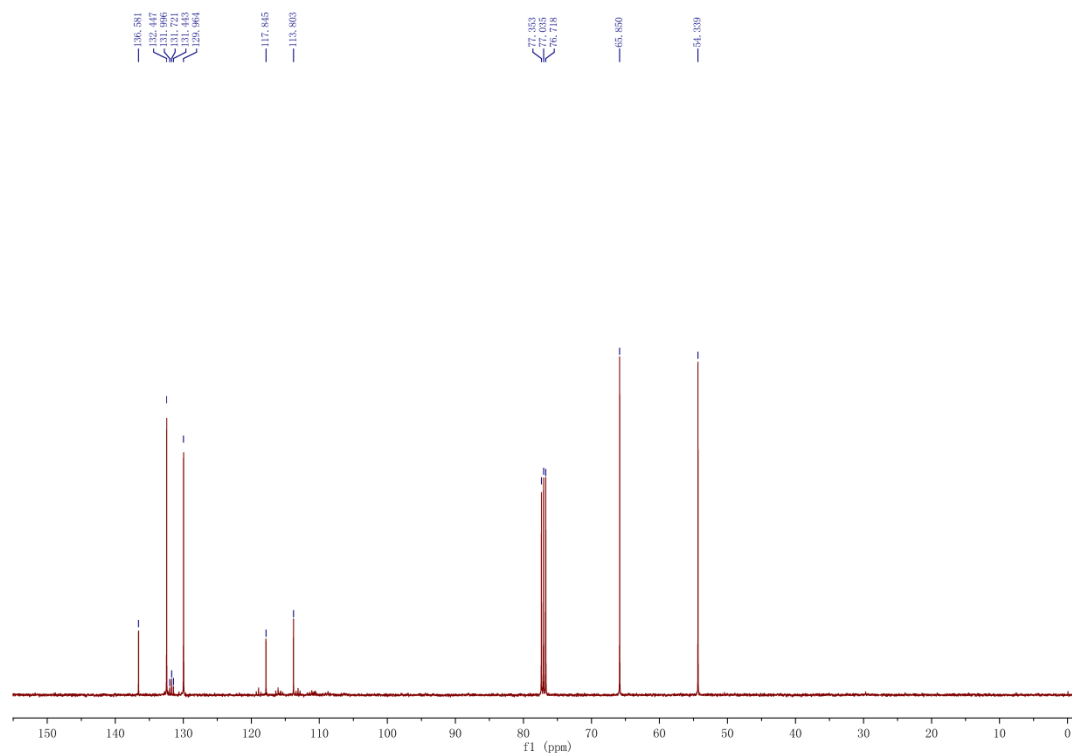

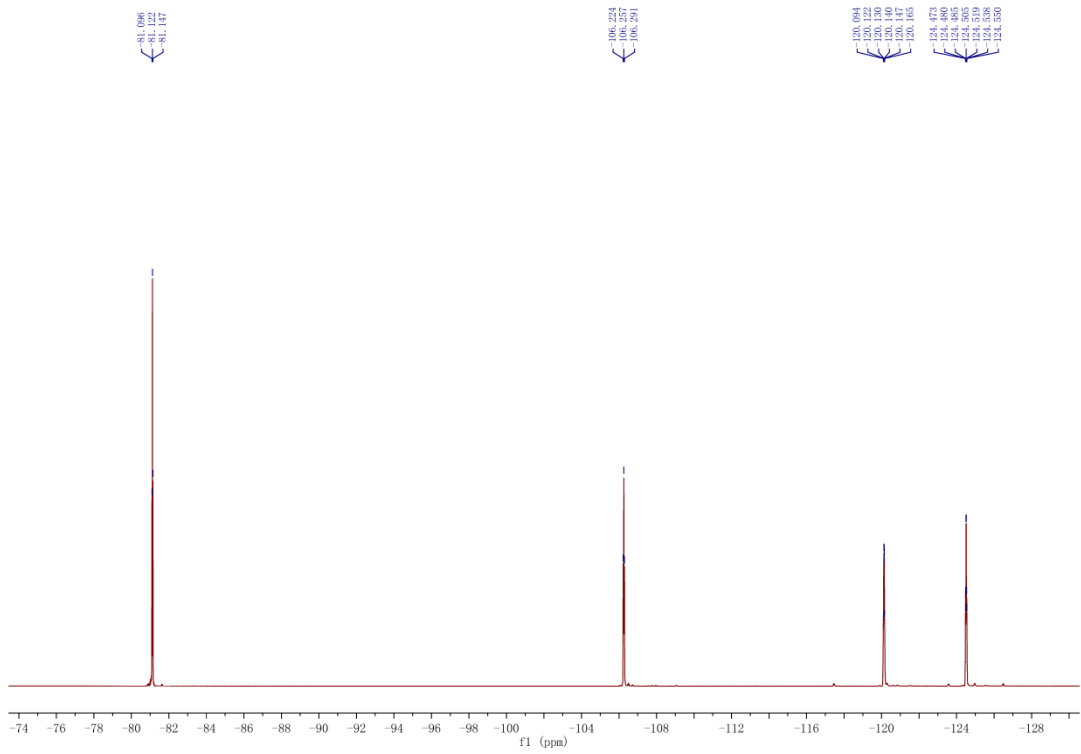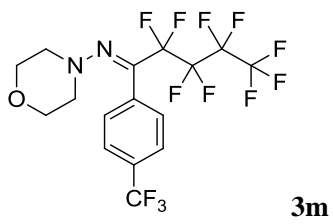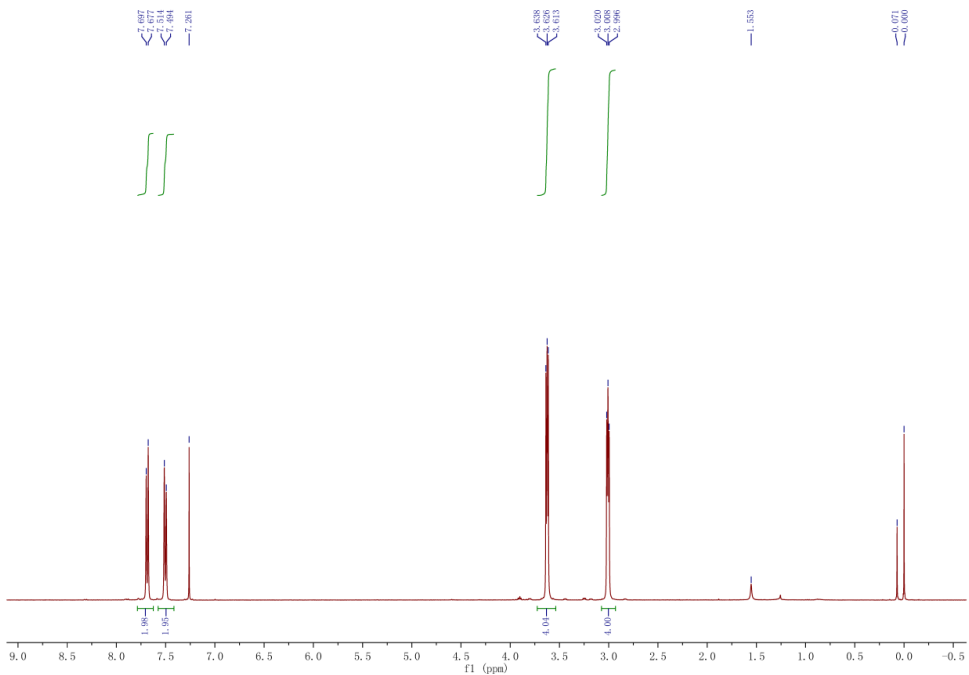



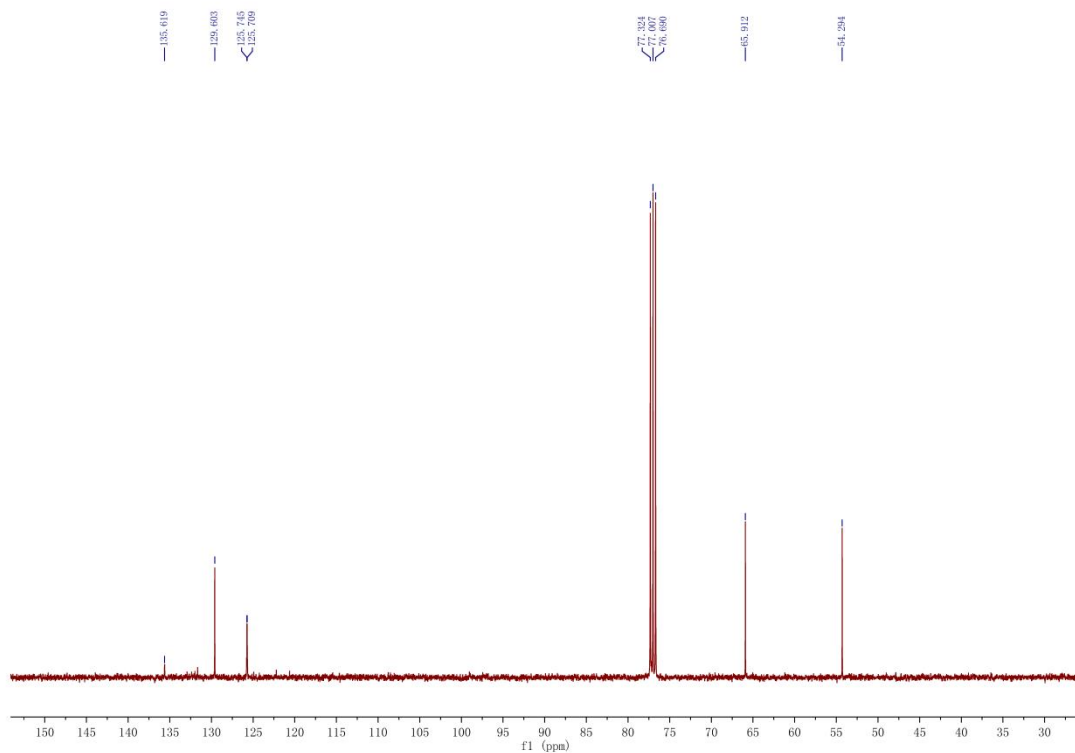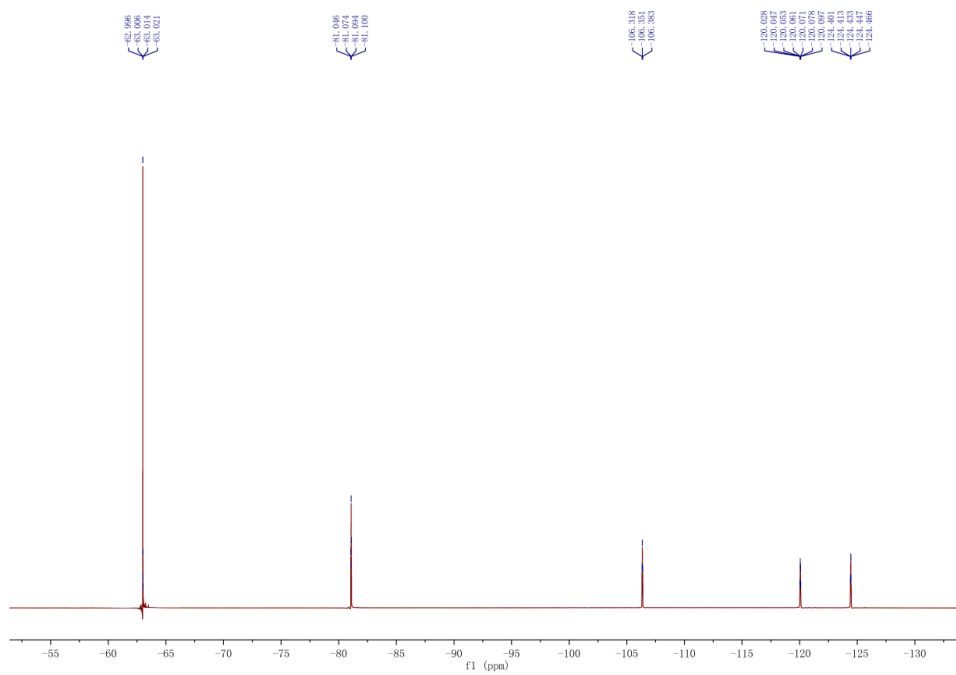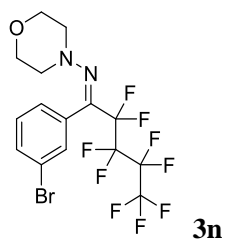

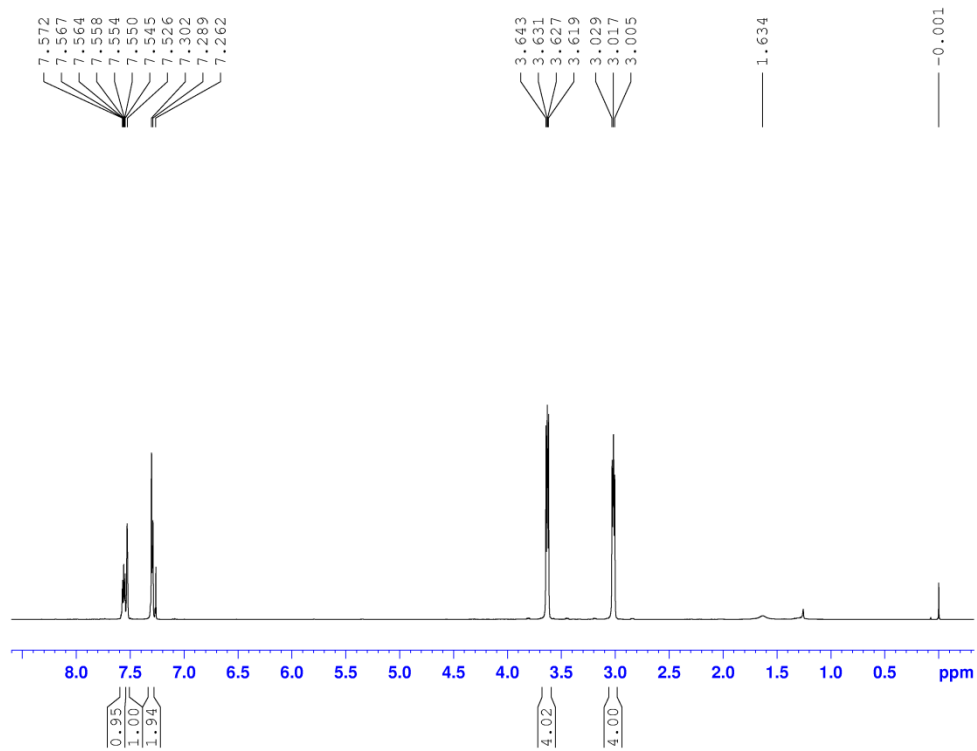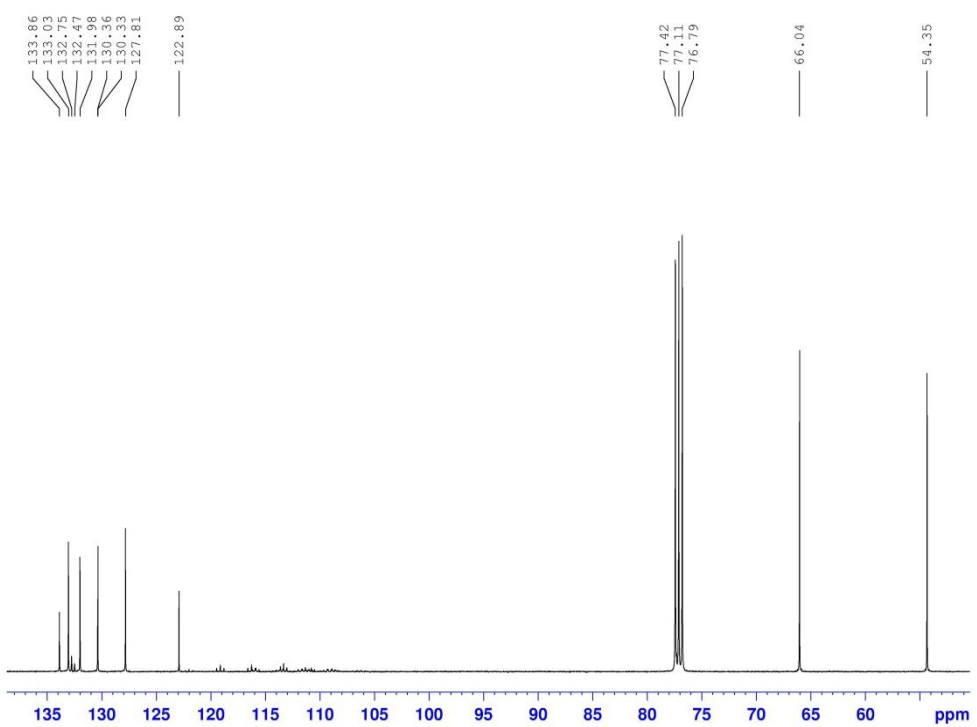

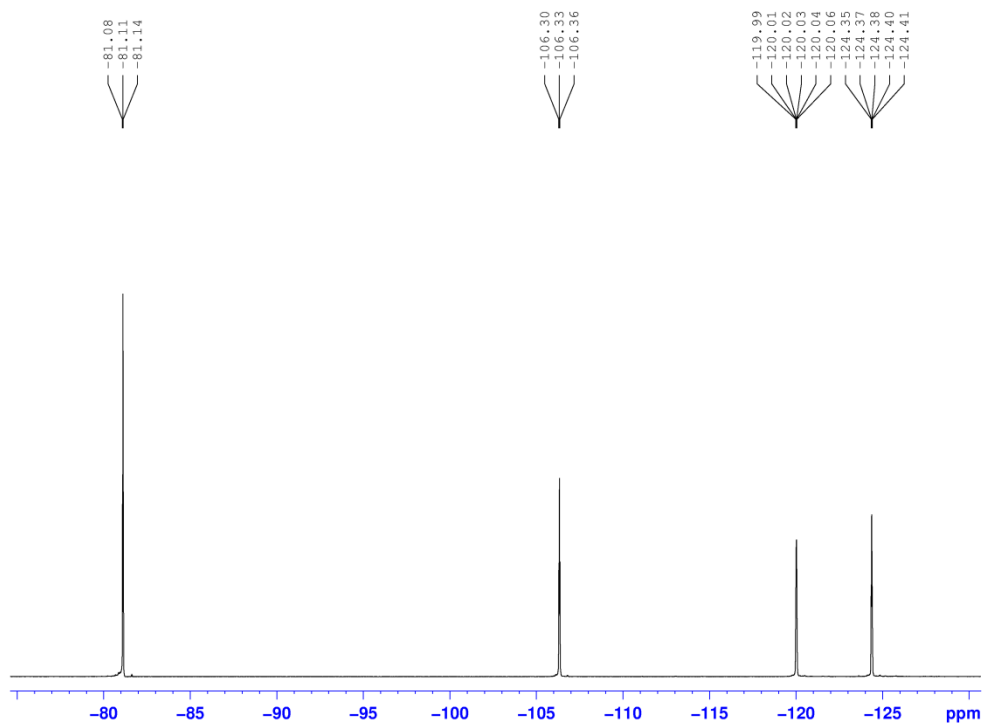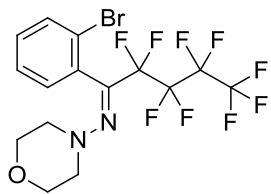

**30**

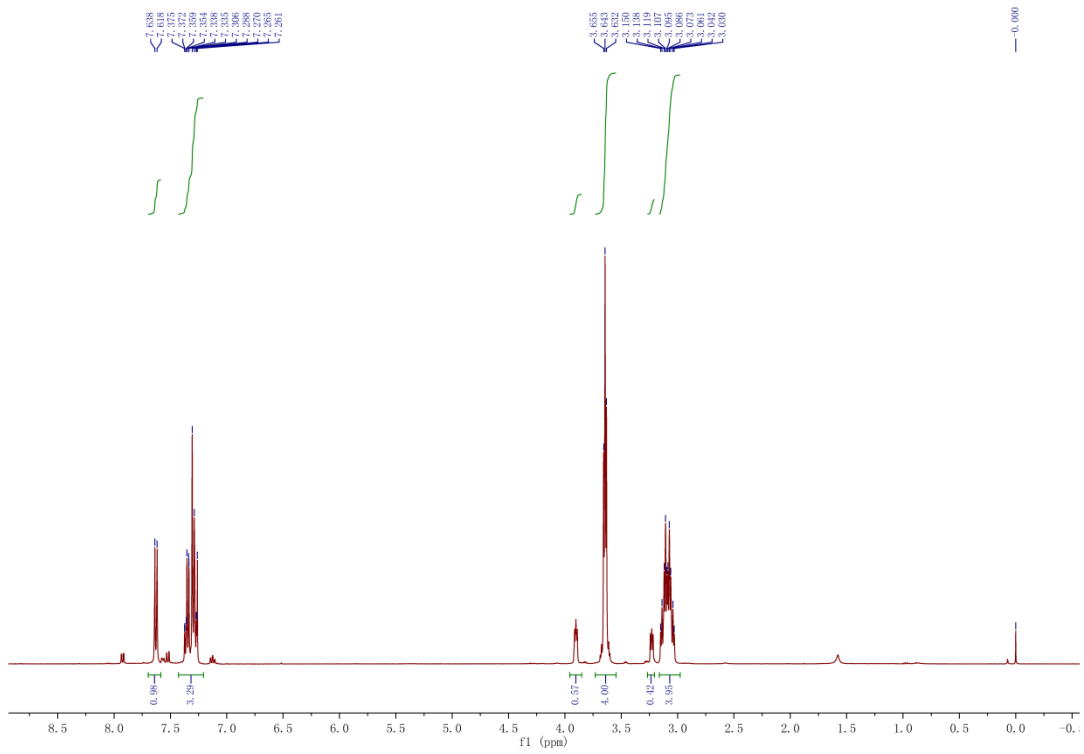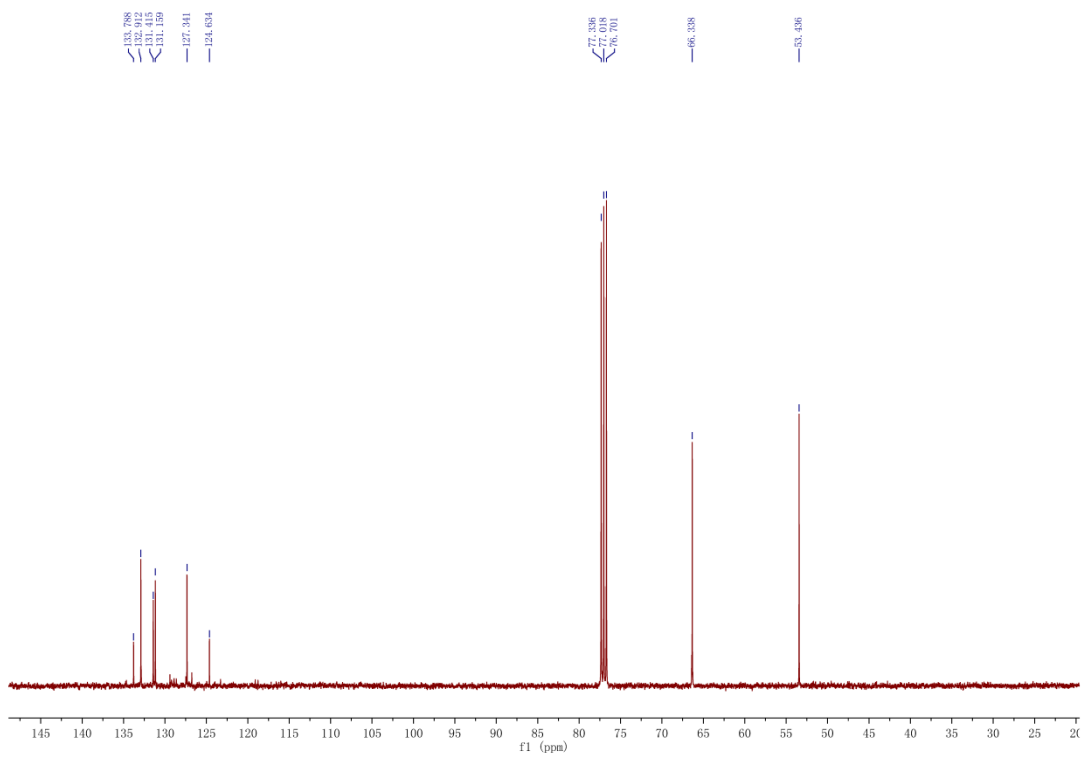

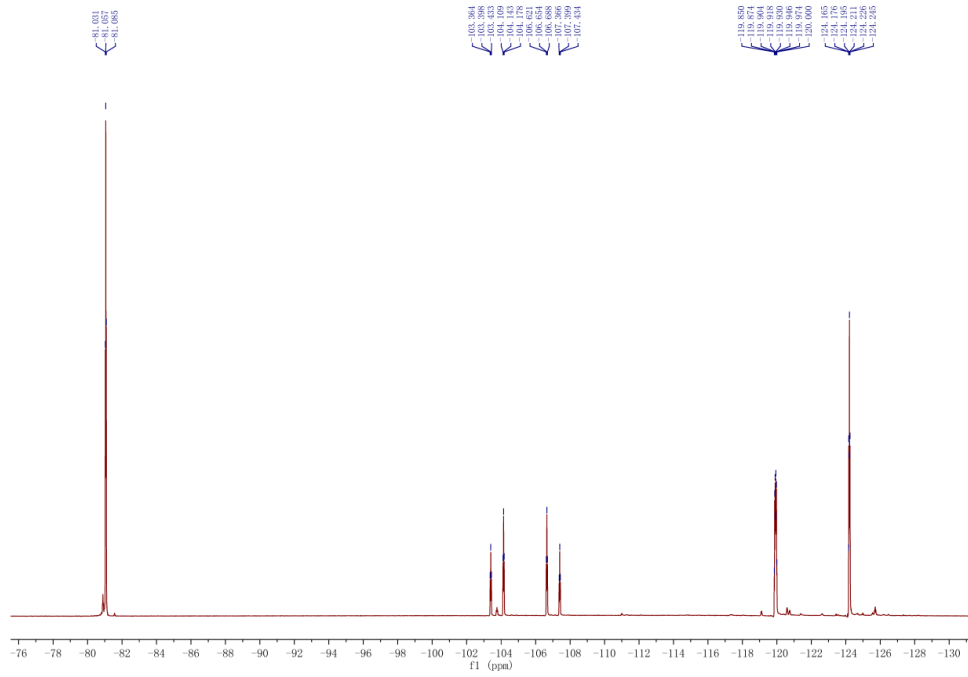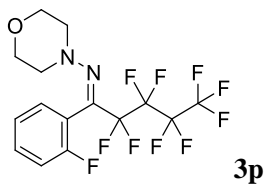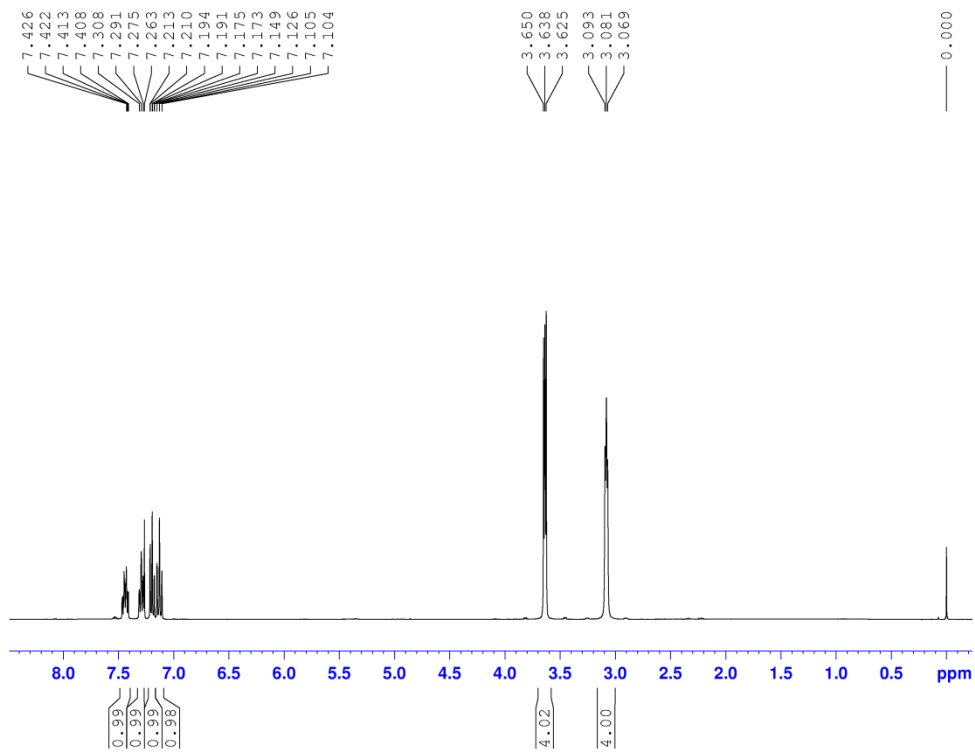

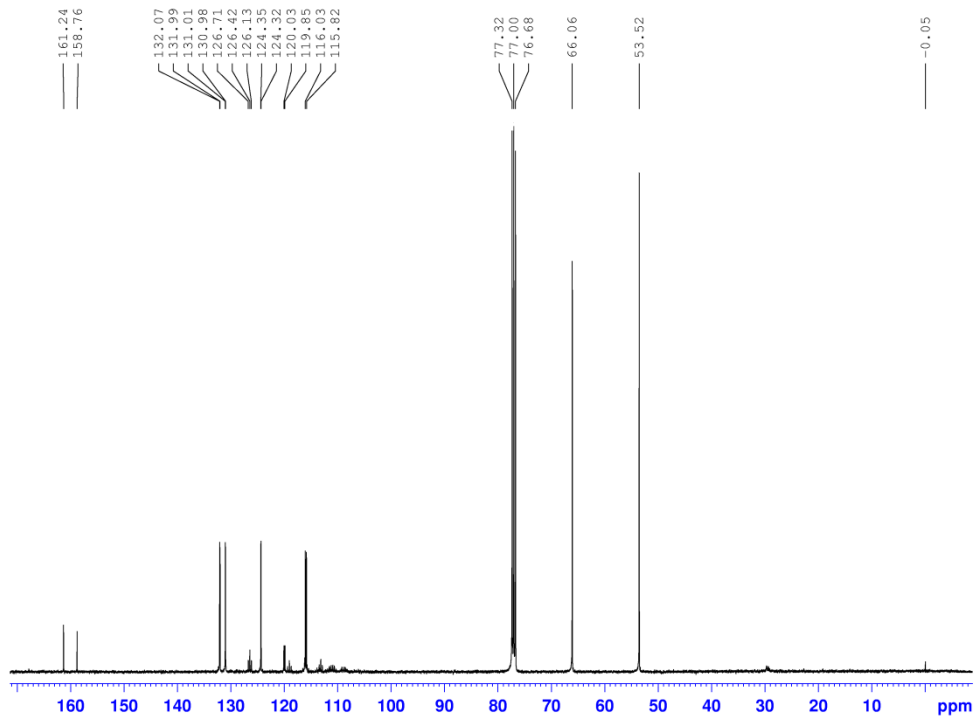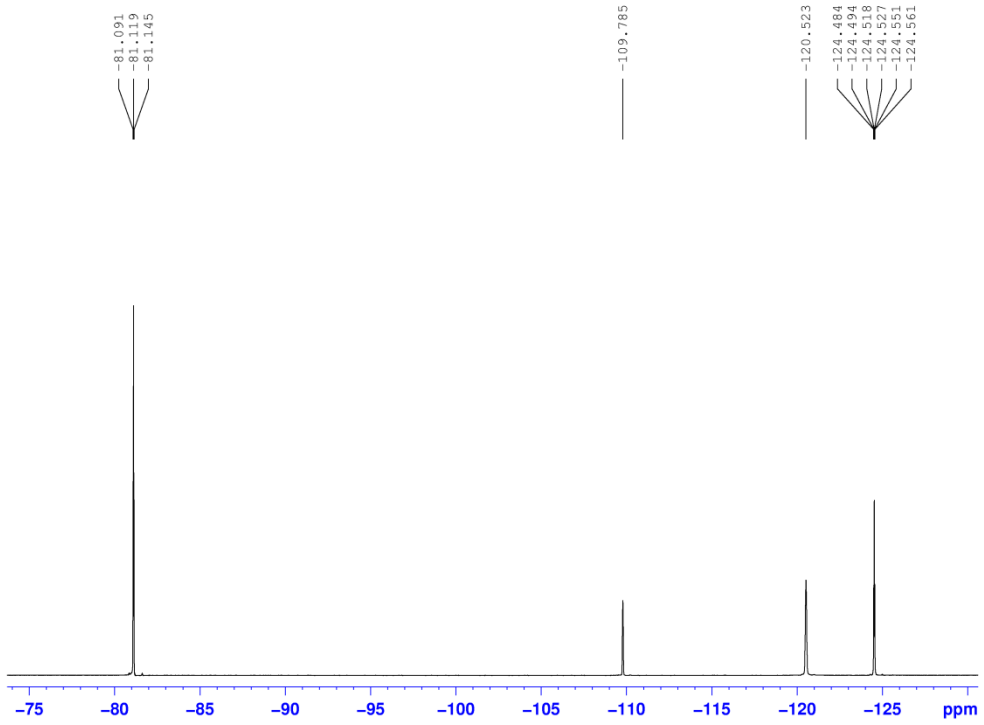

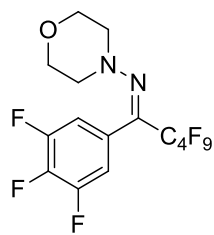

**3q**

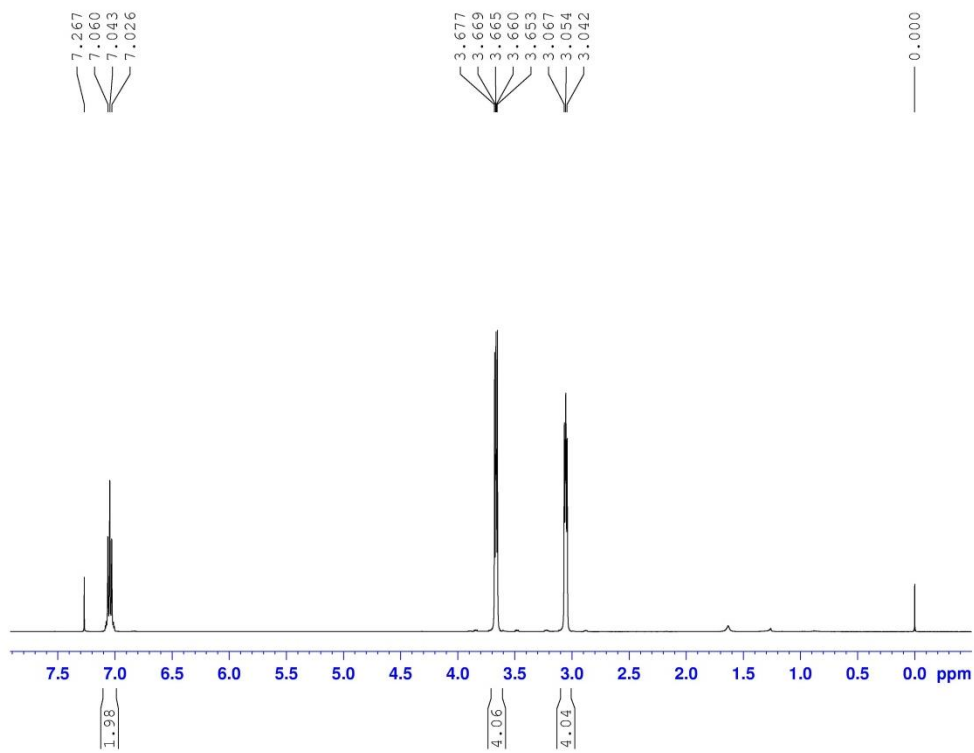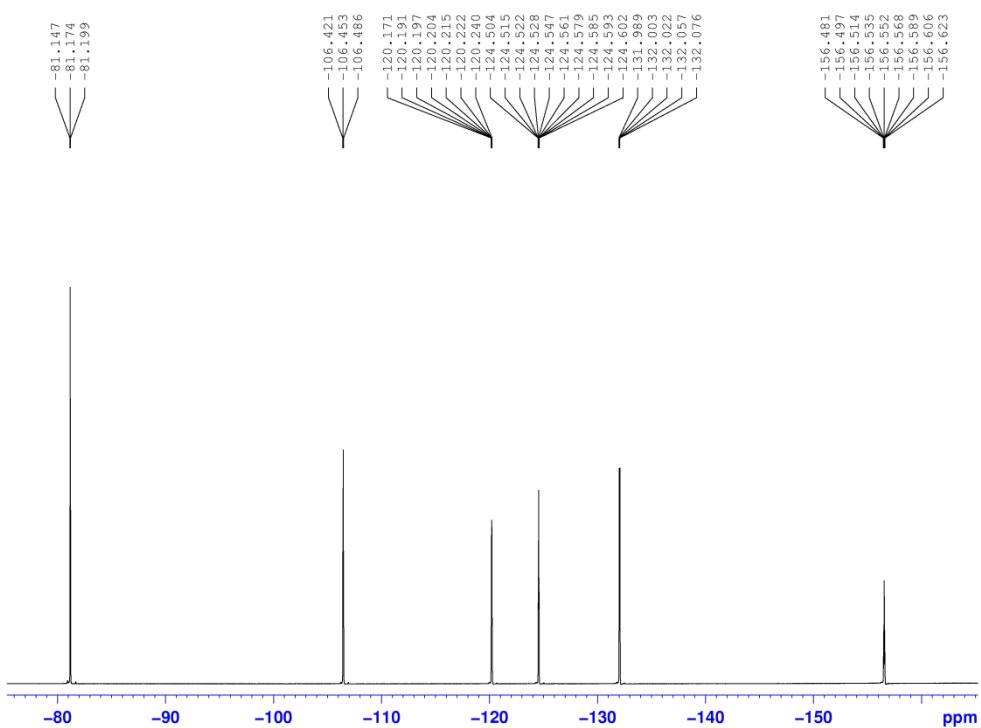

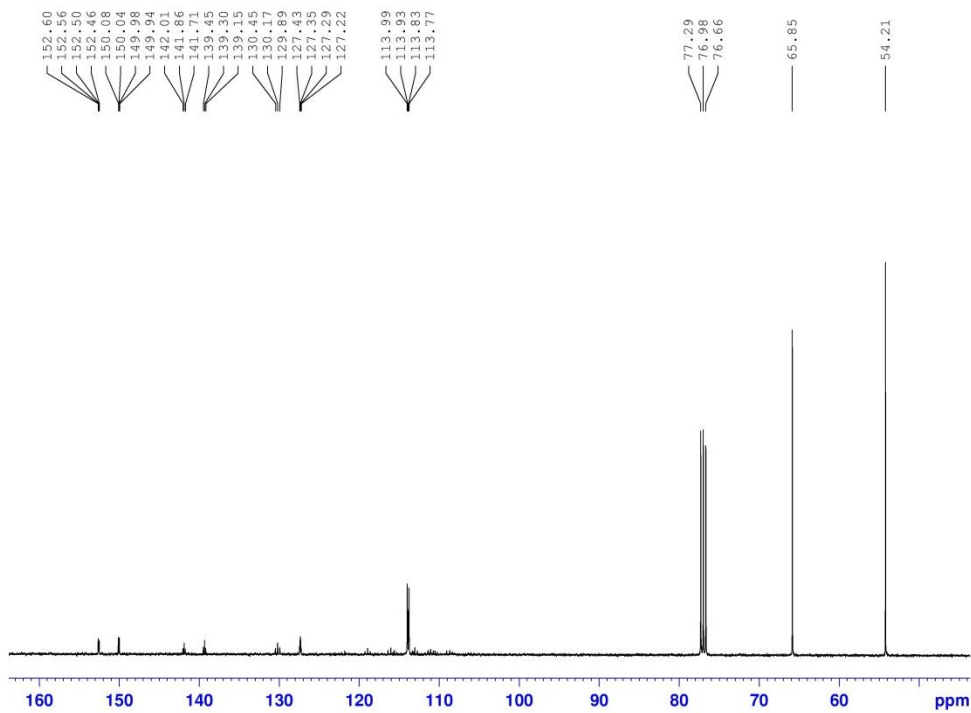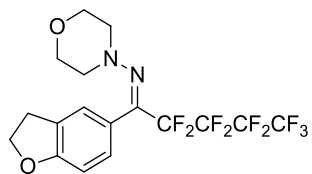

**3r**

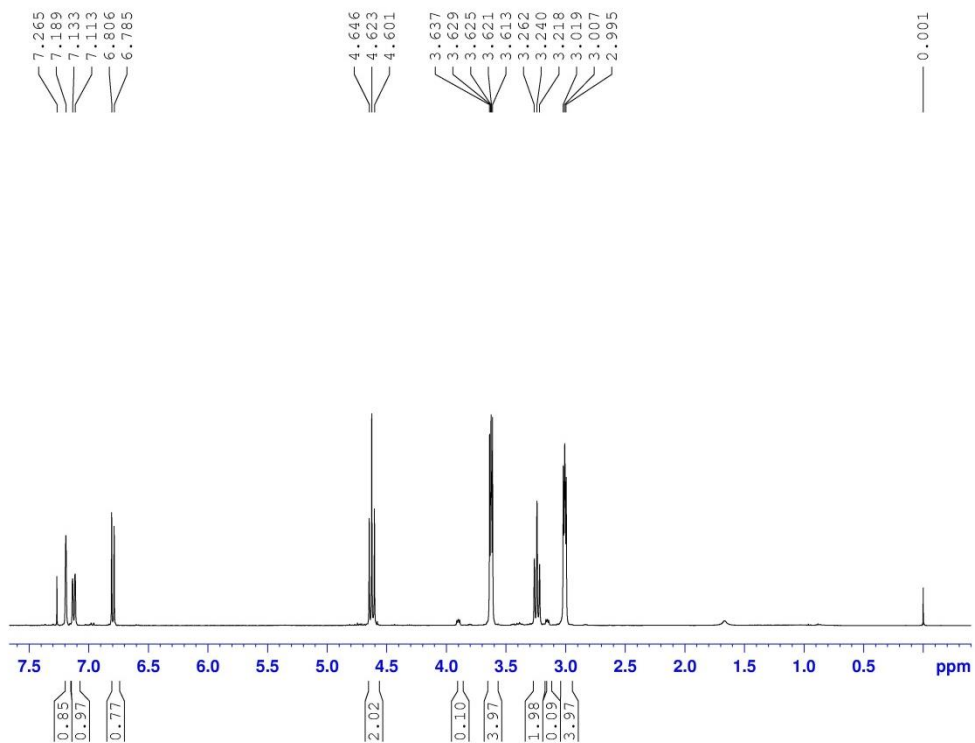



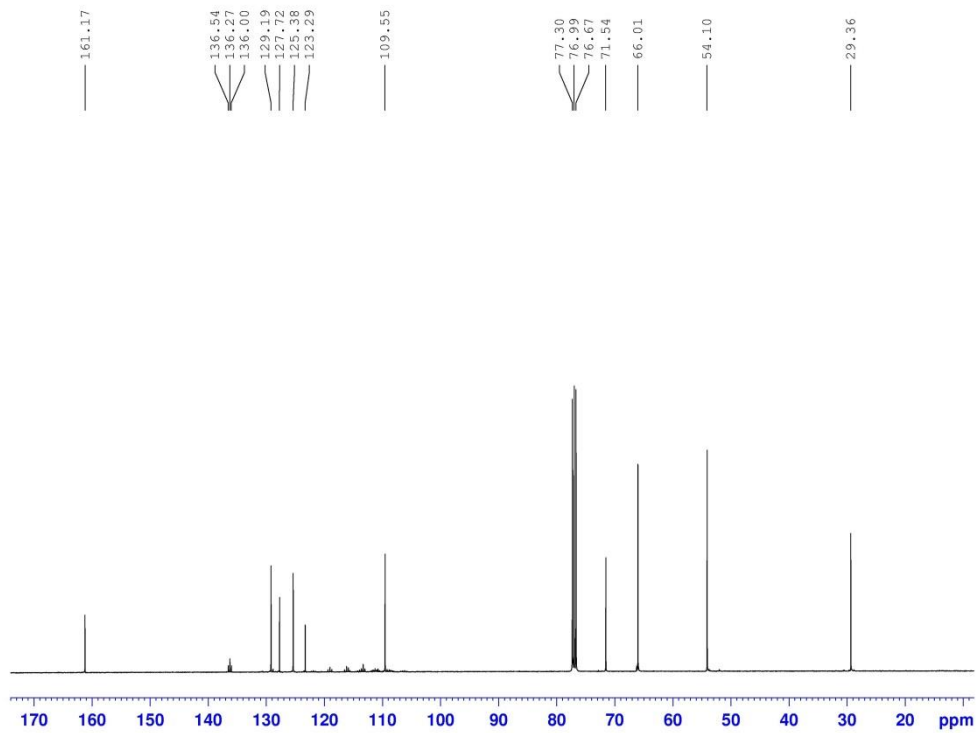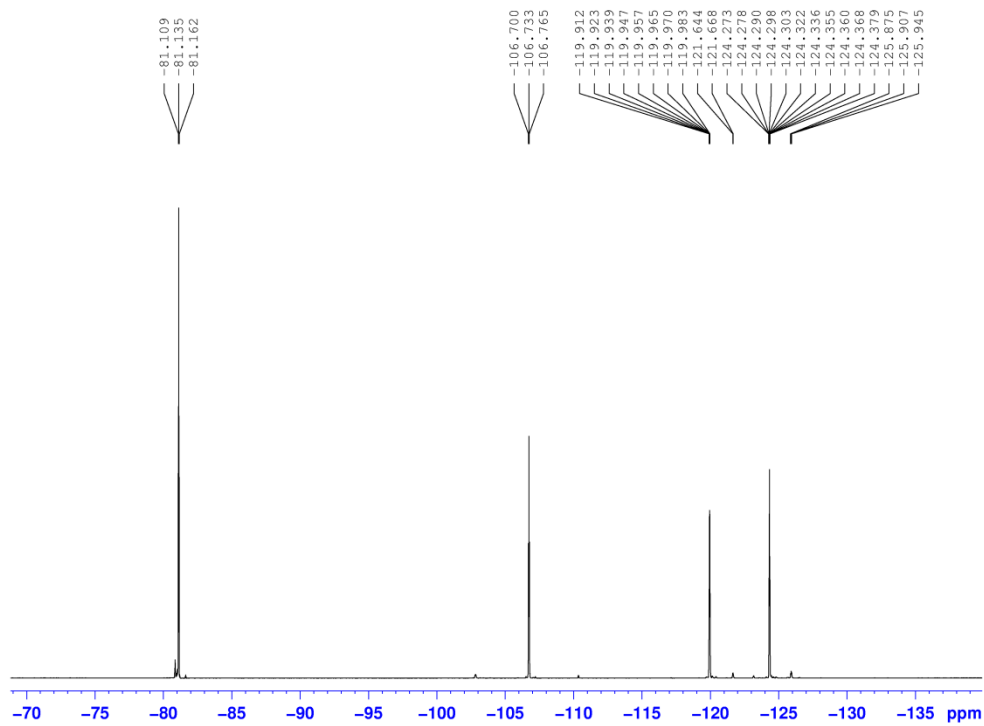

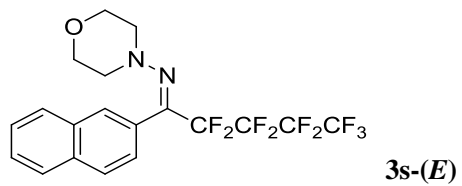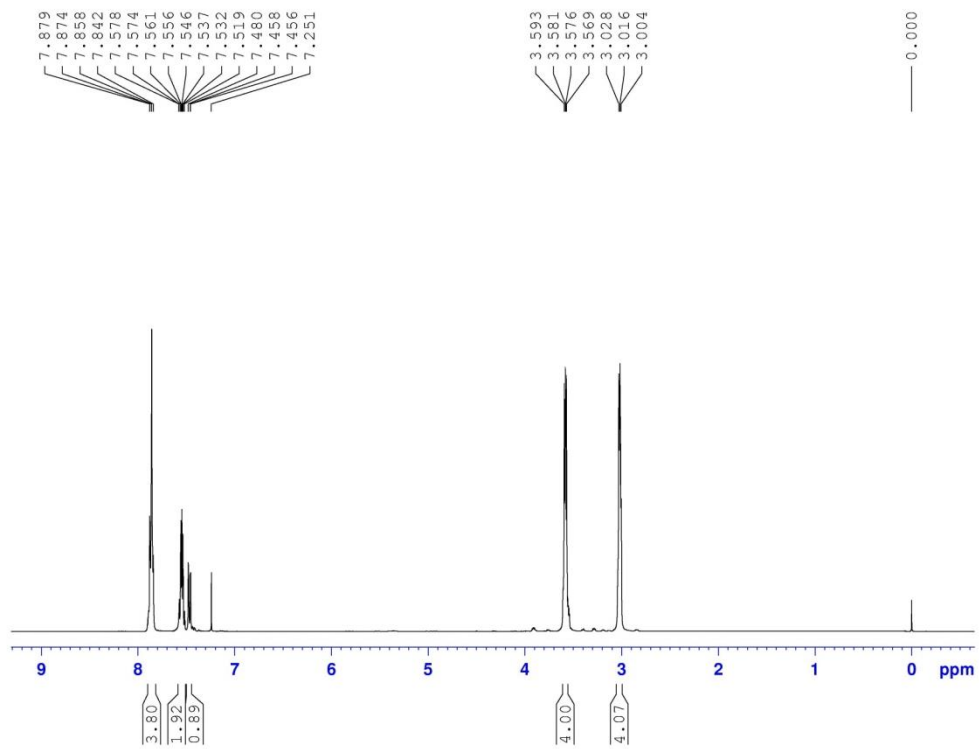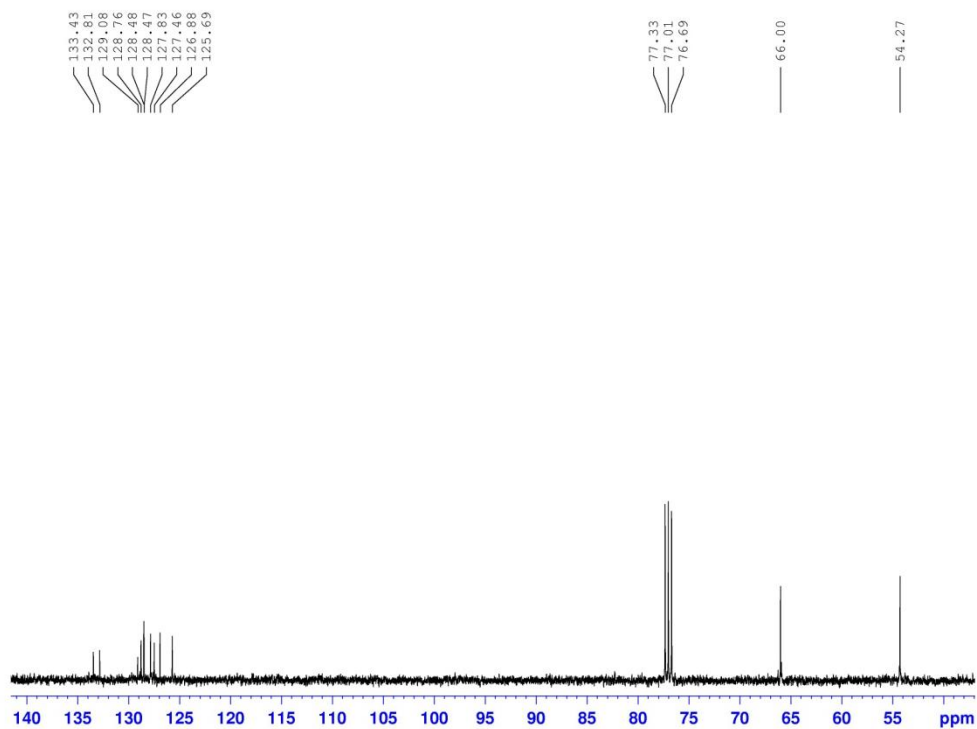

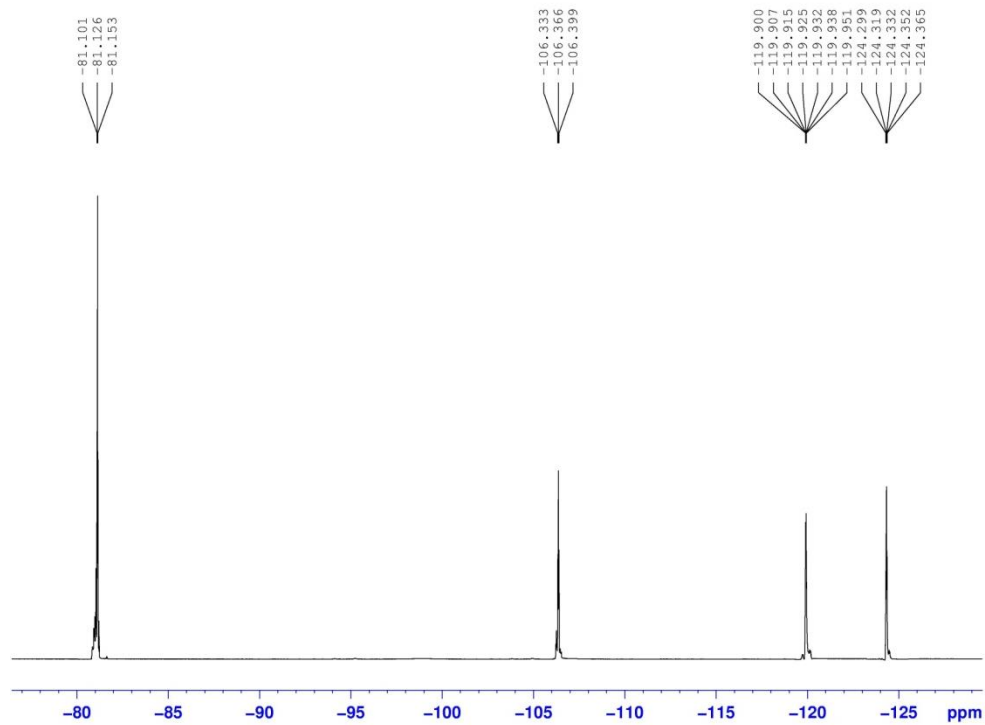

**3s-(Z)**

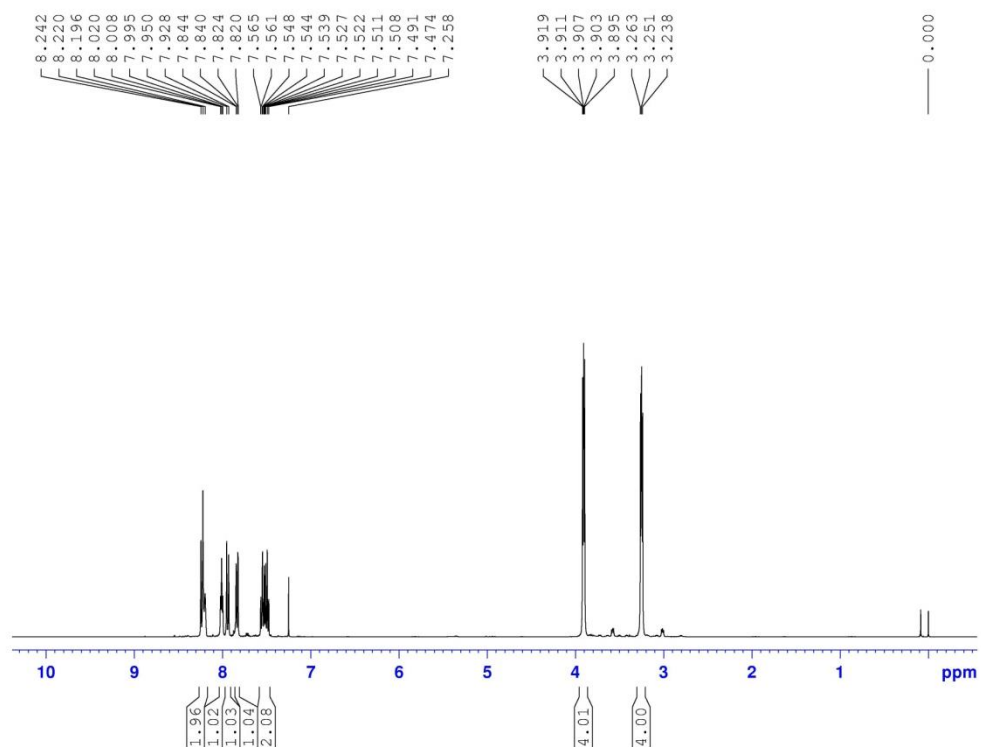

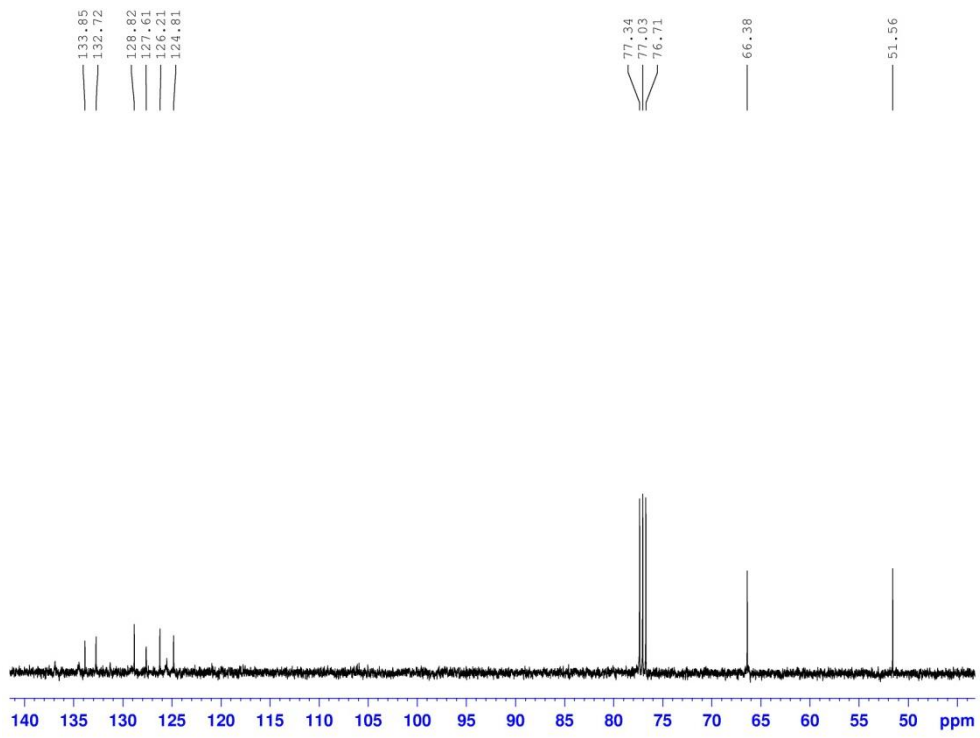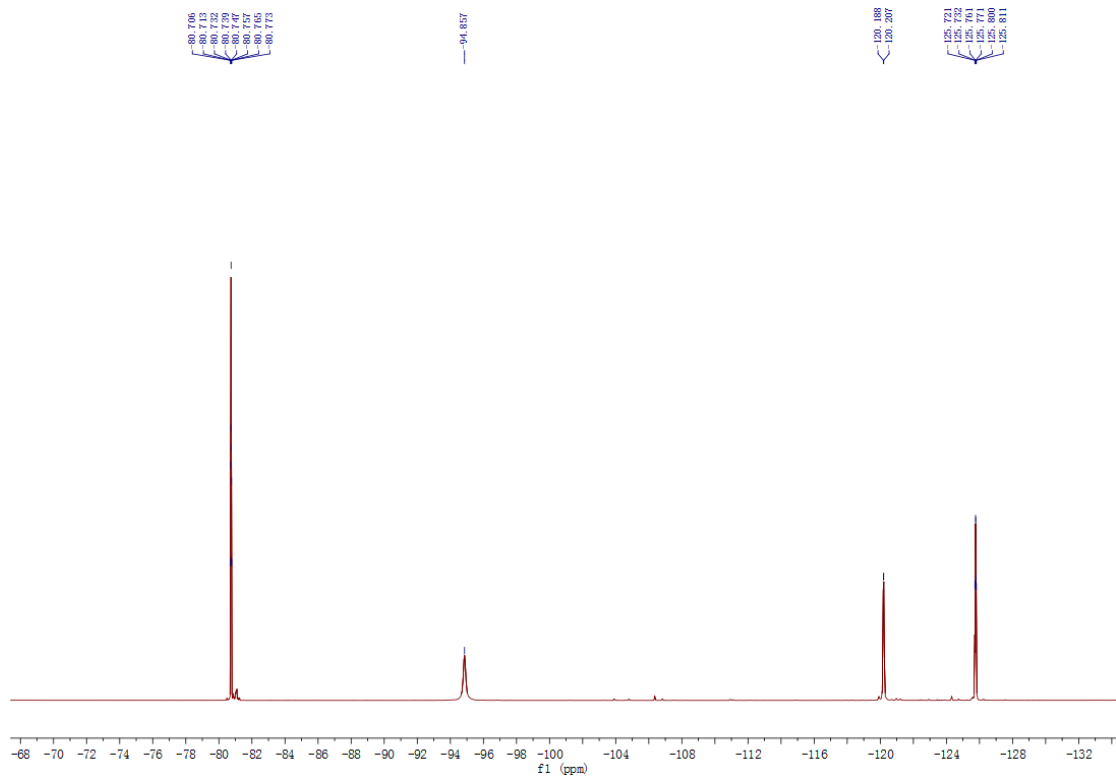

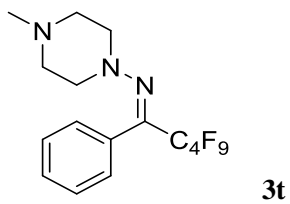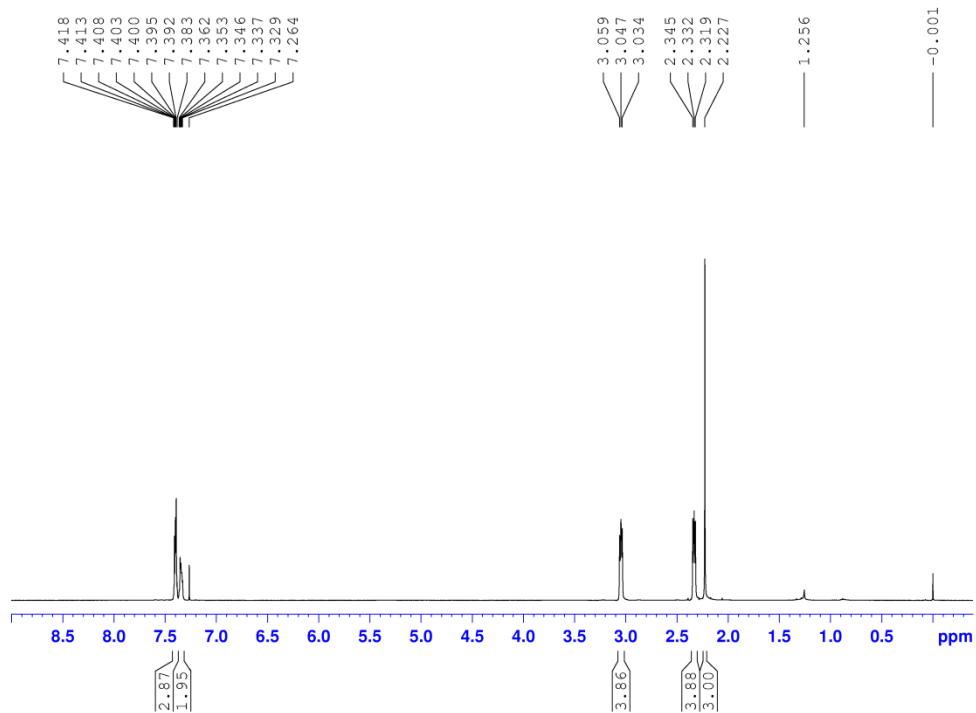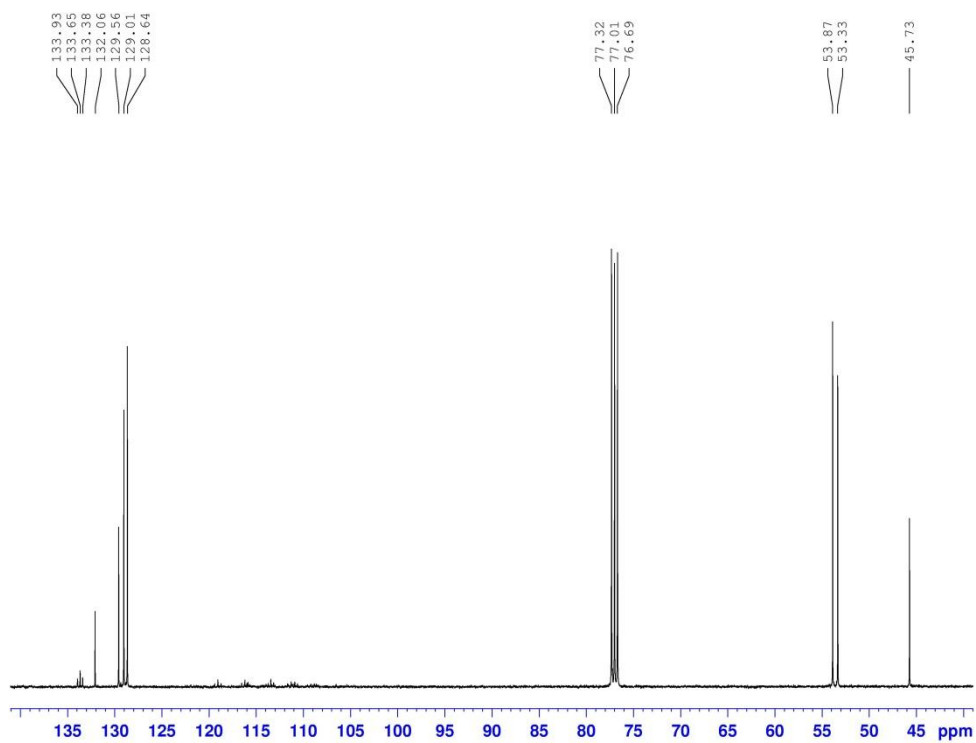

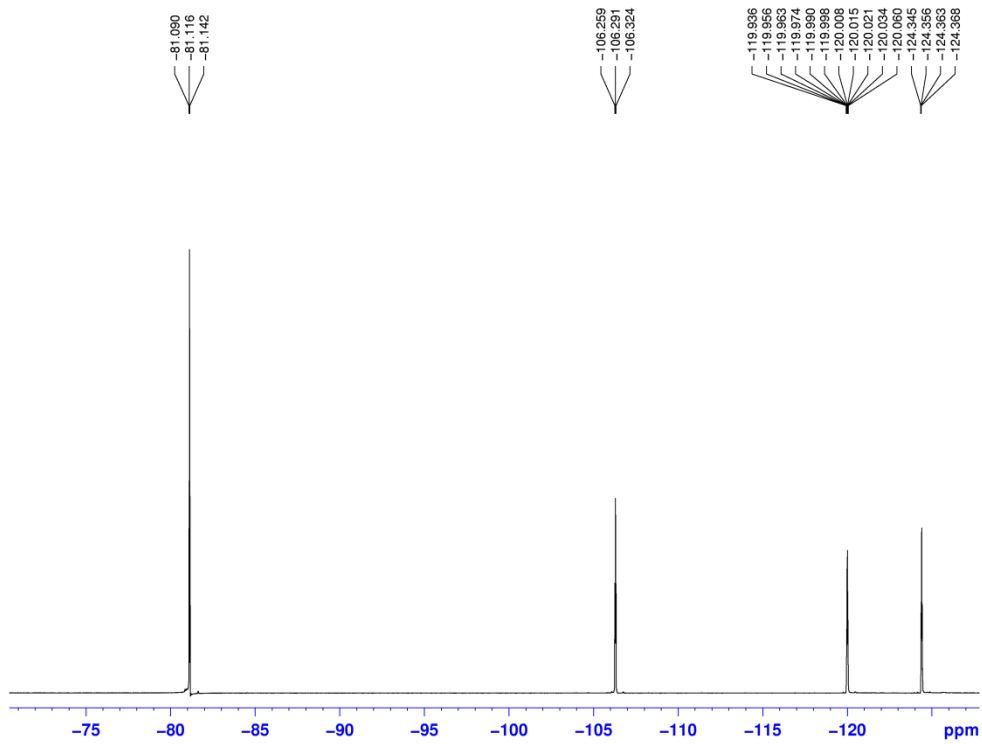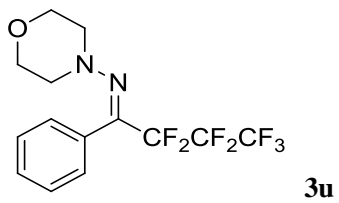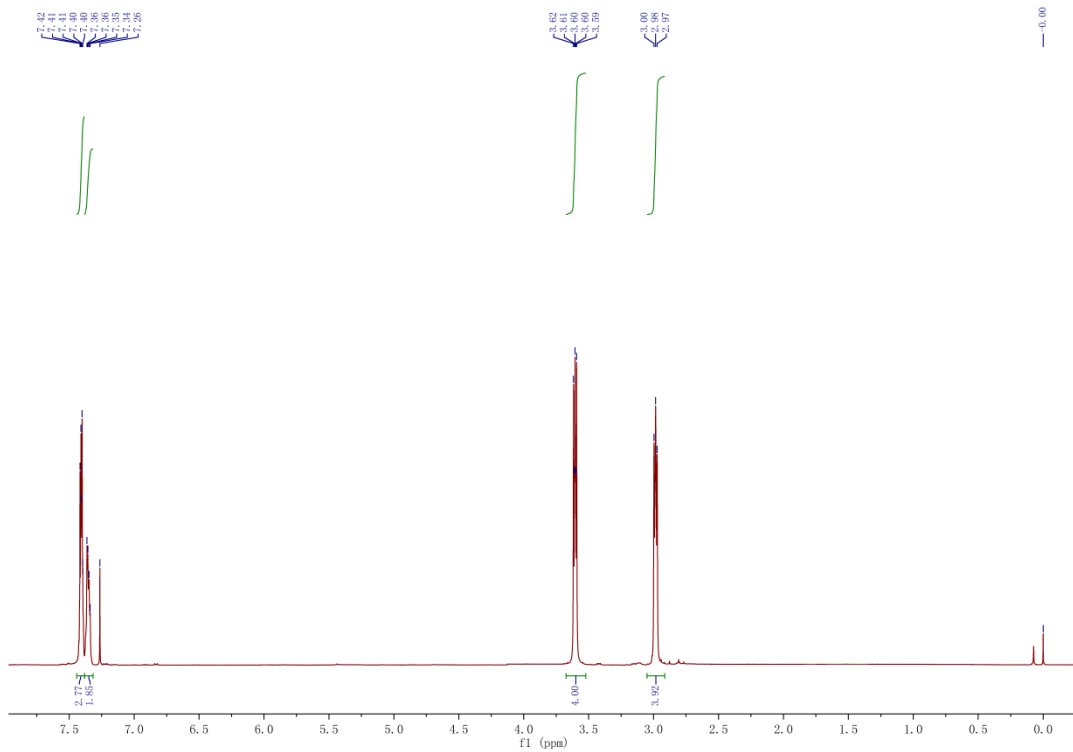

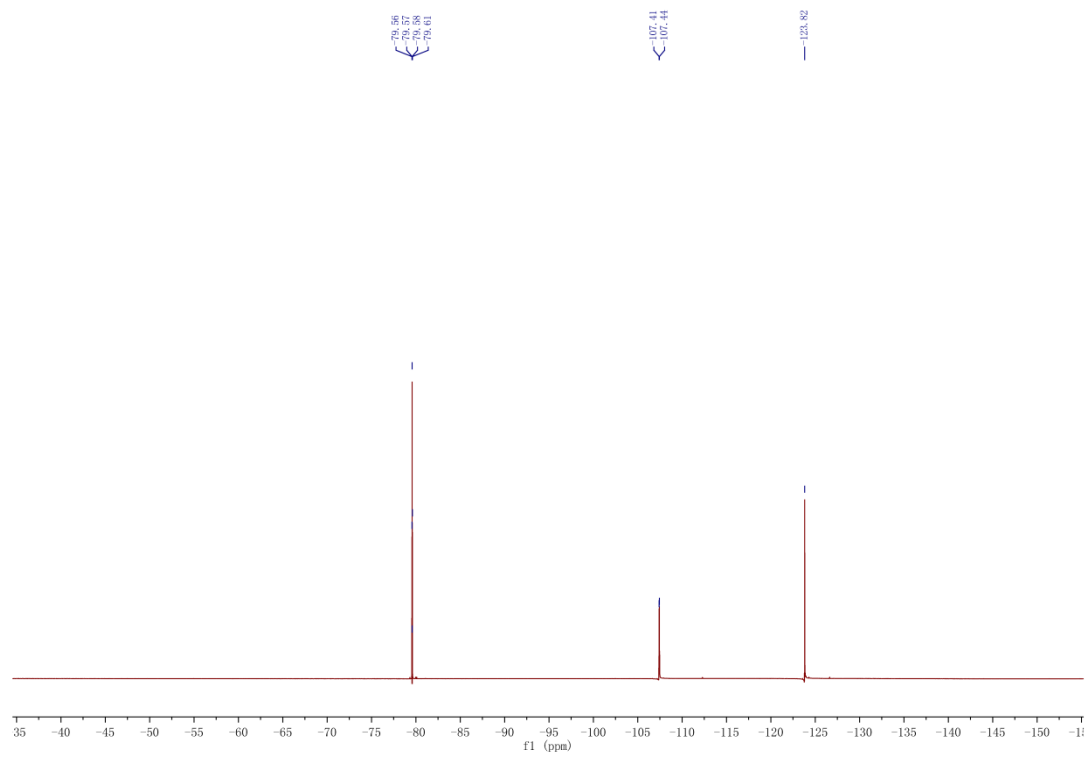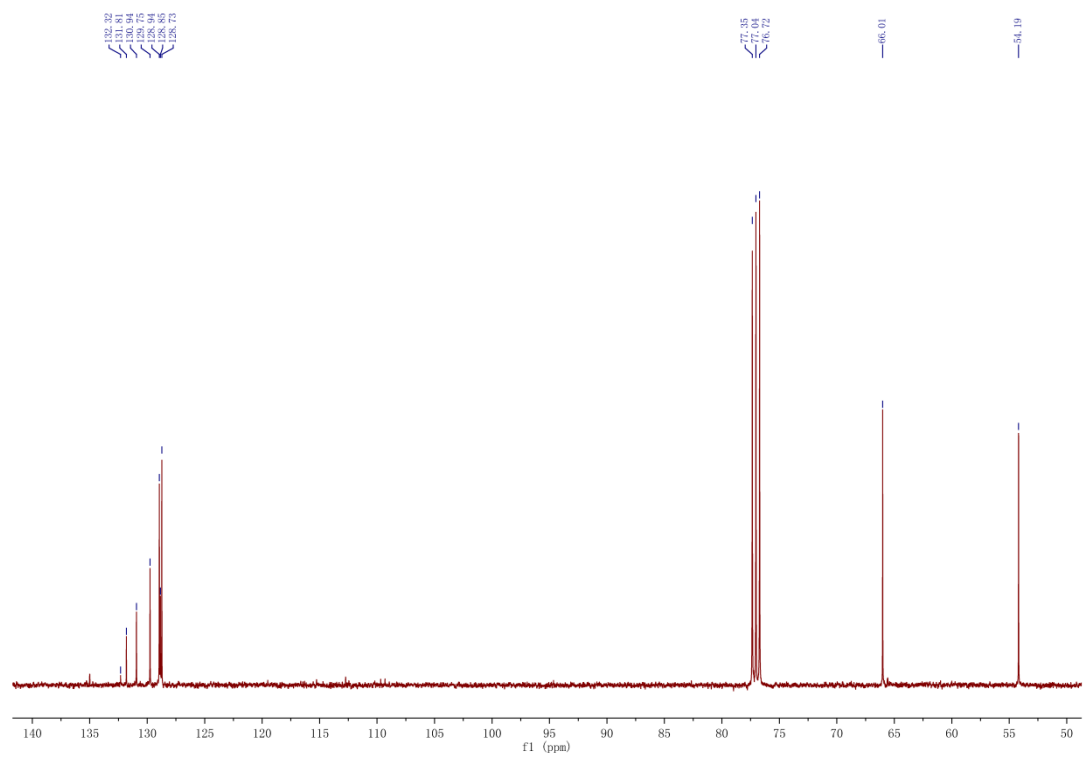

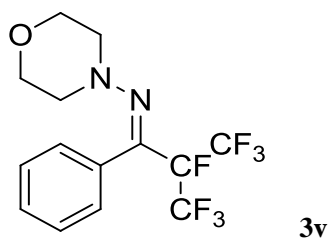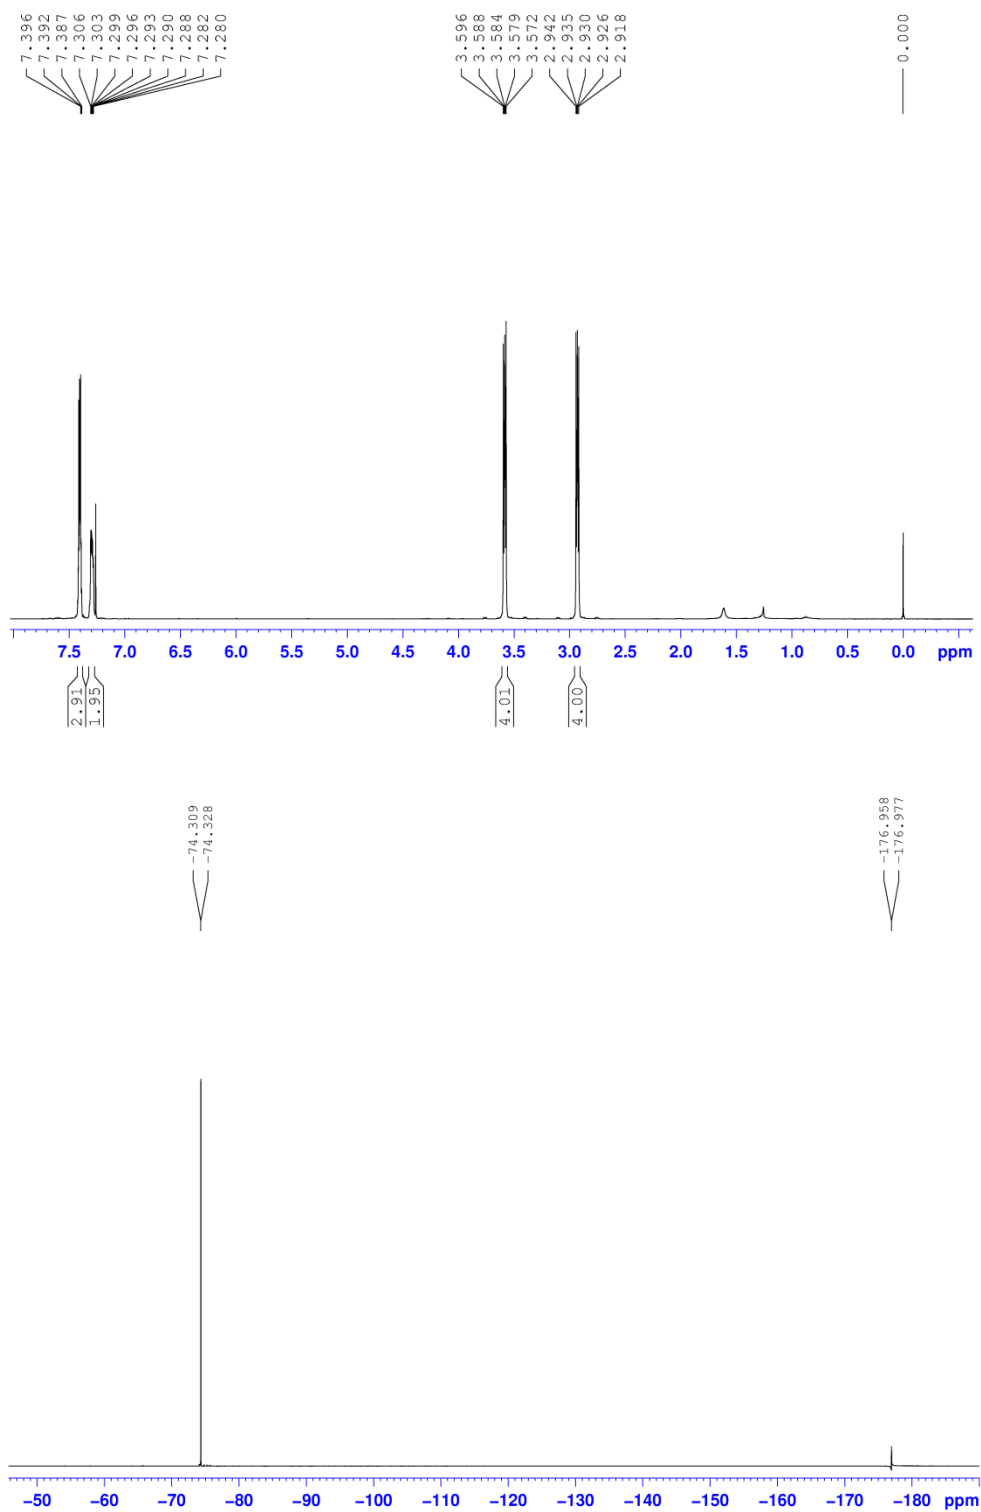



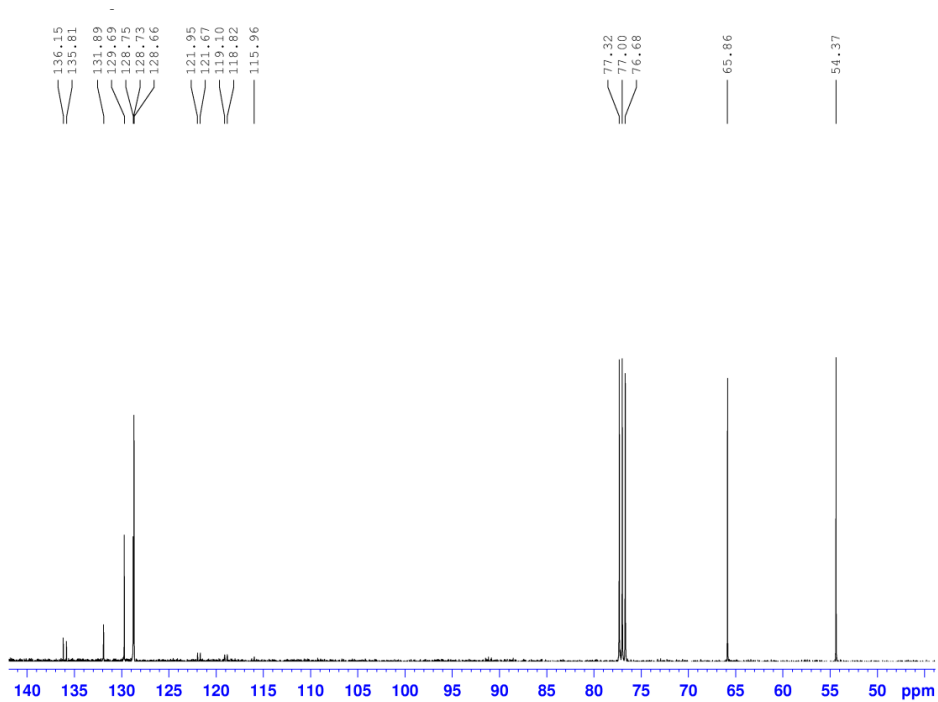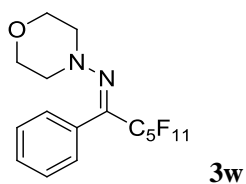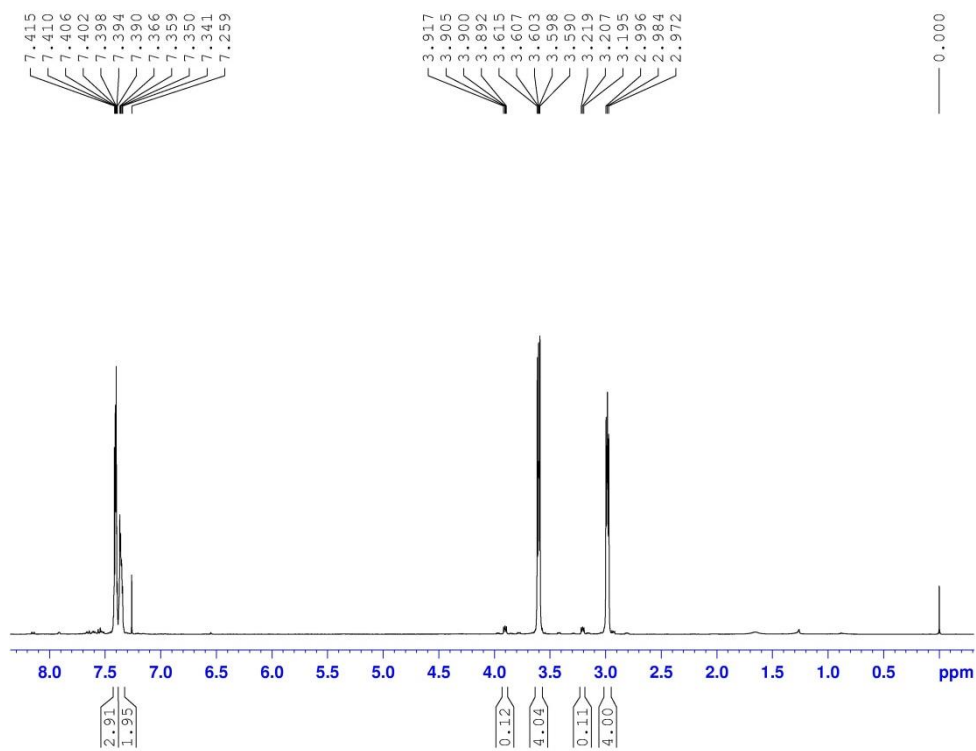

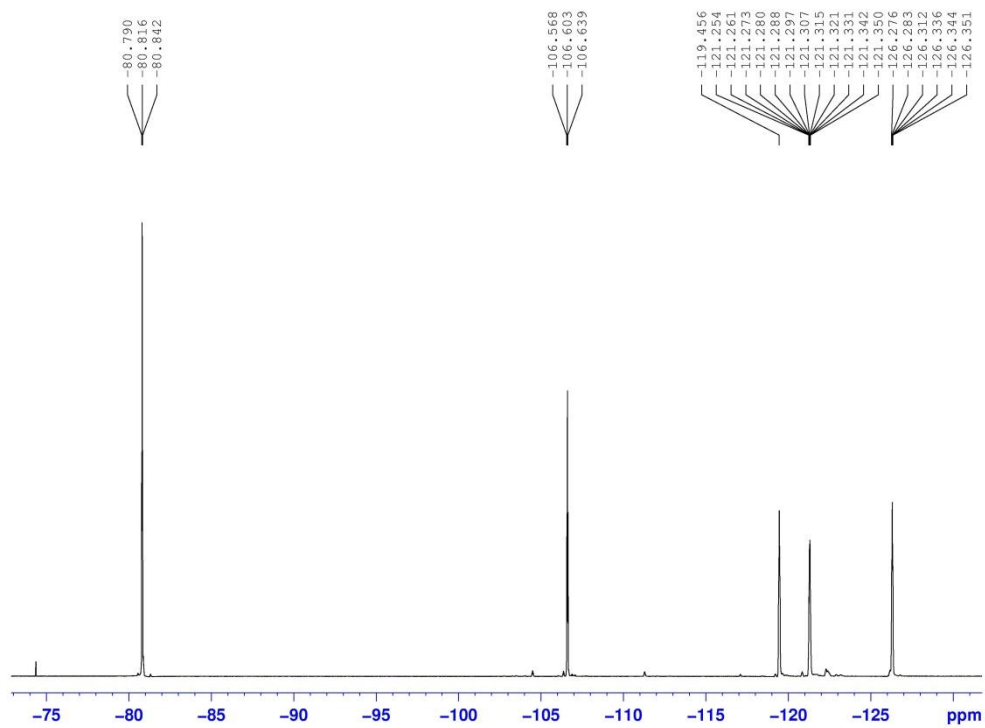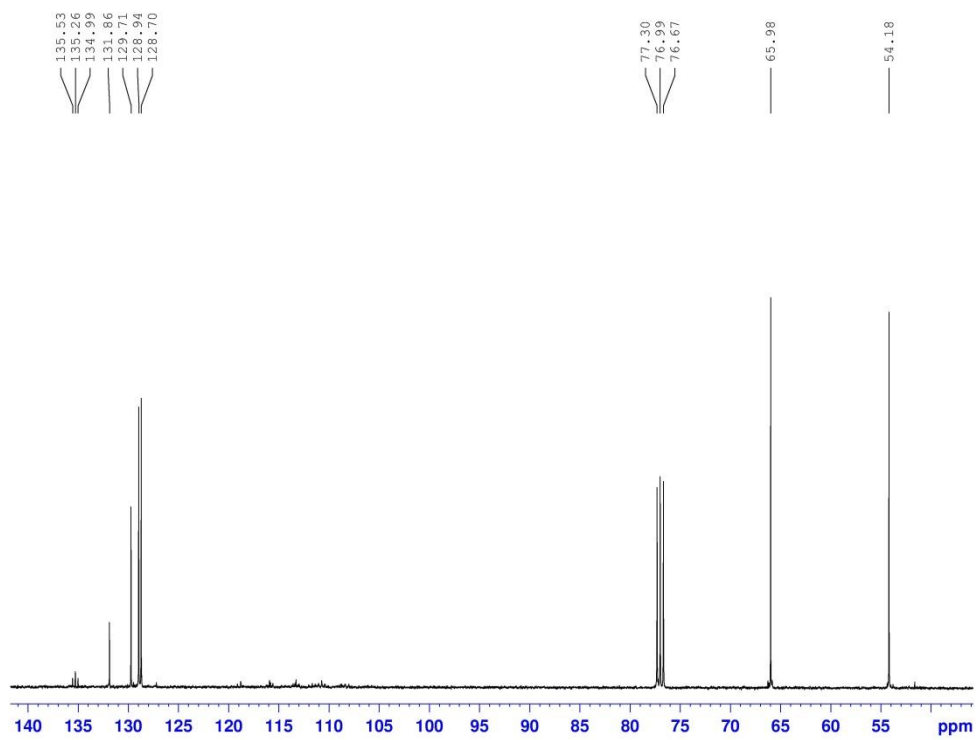

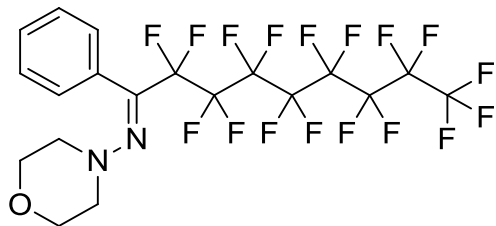

**3x**

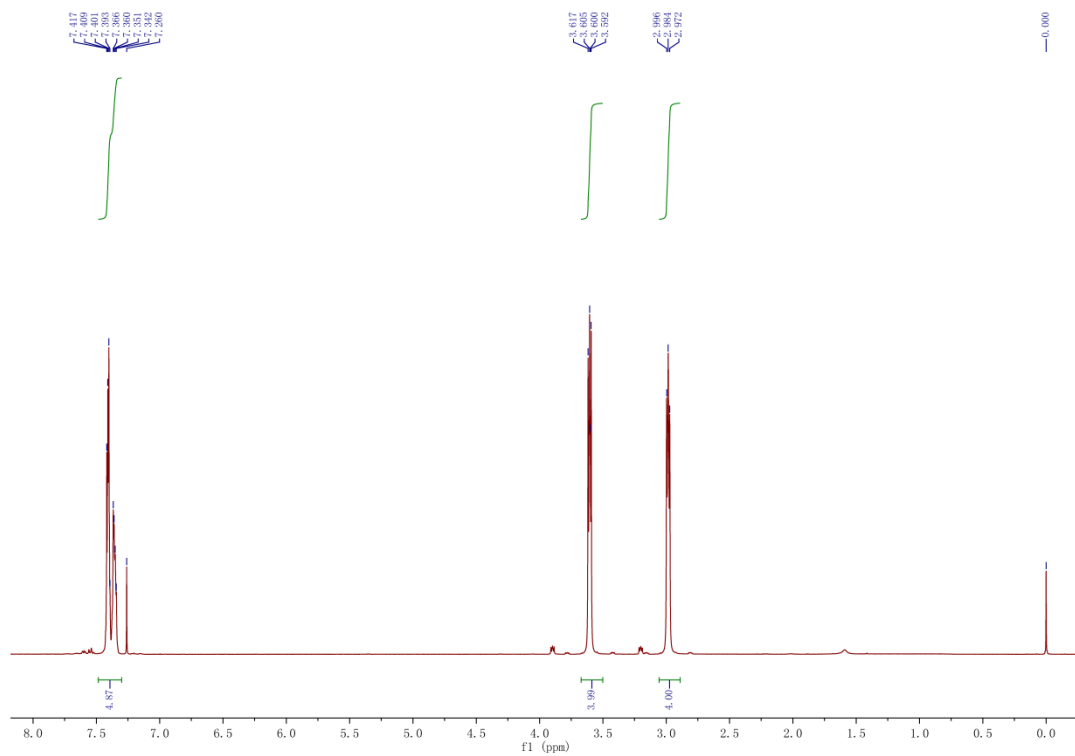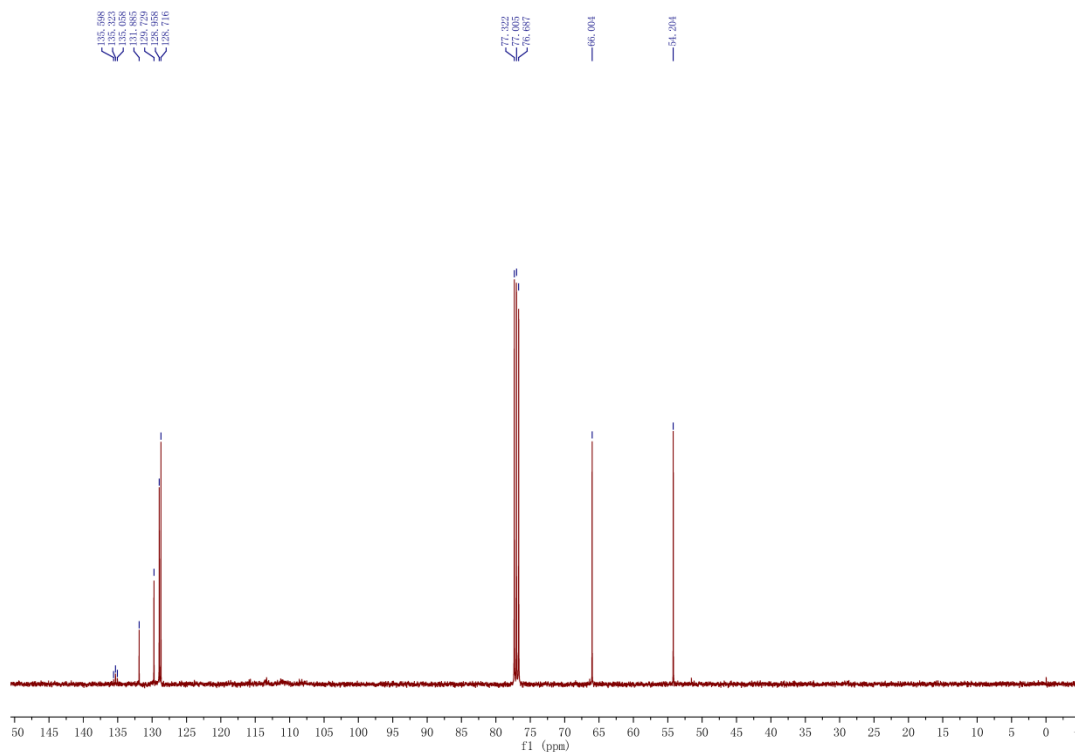

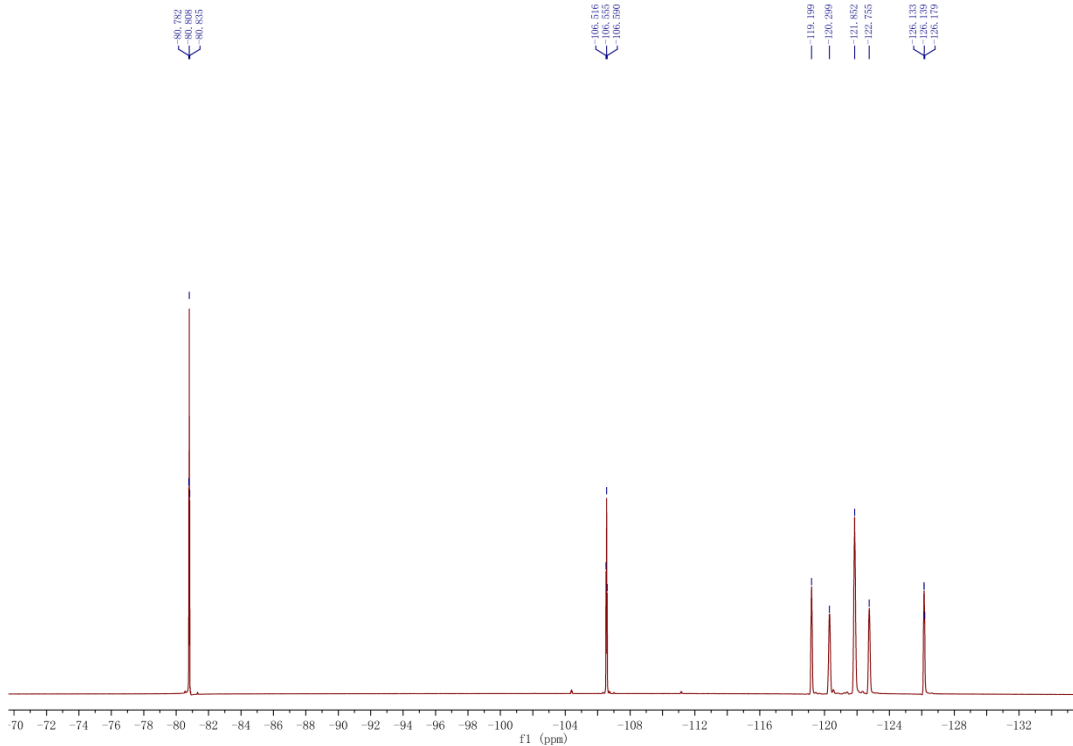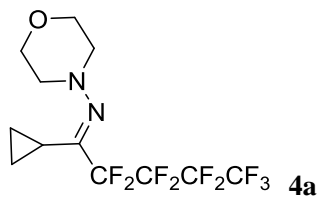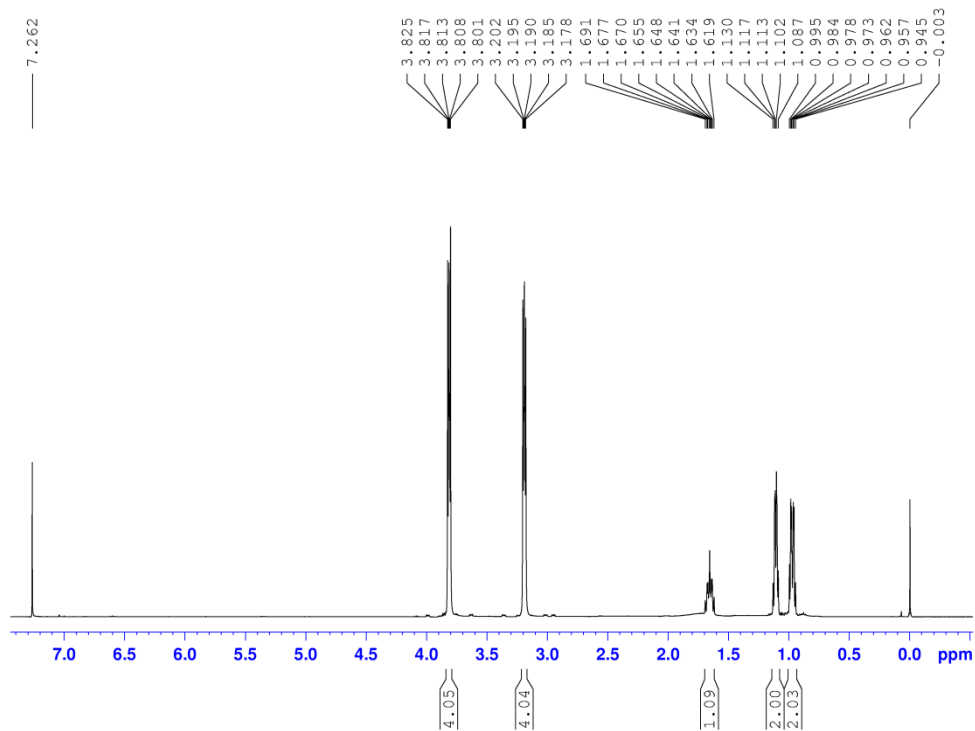

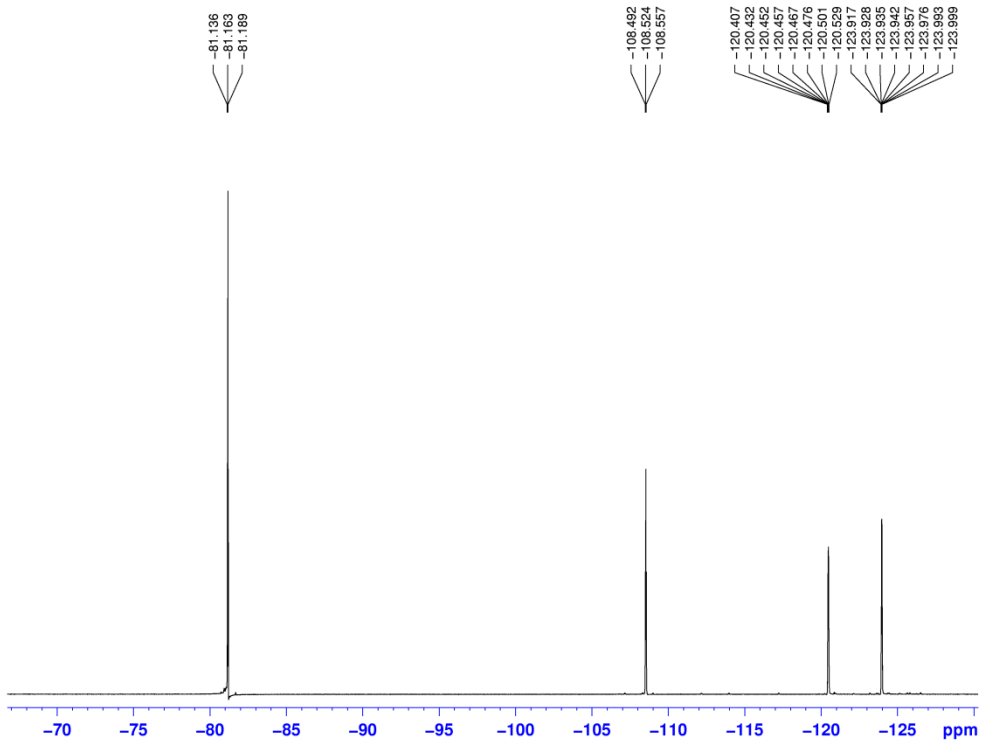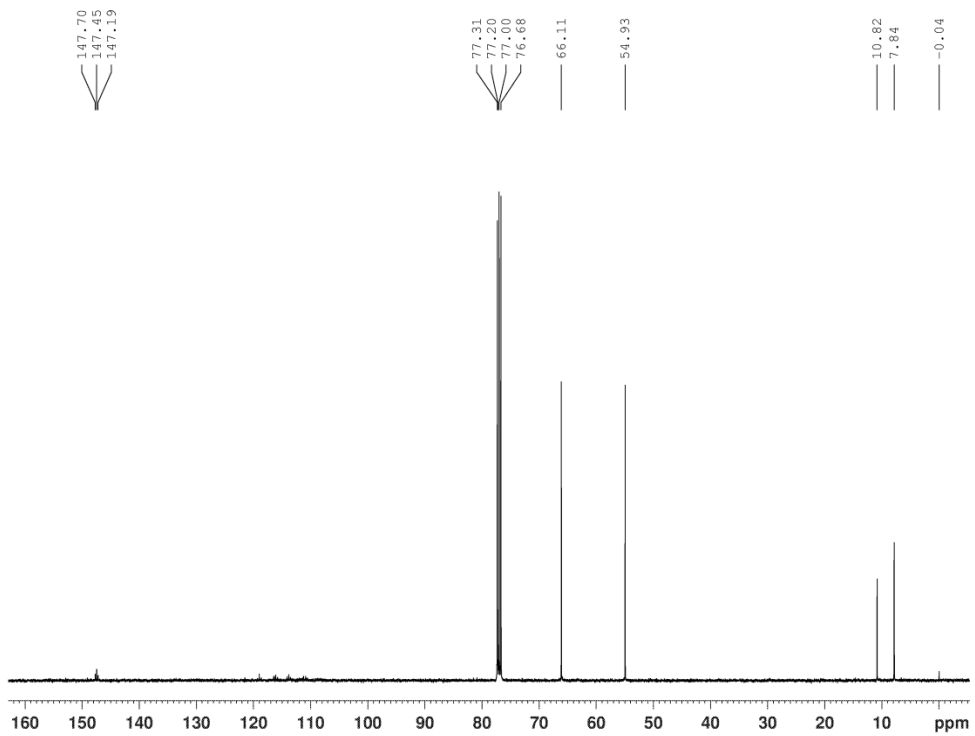

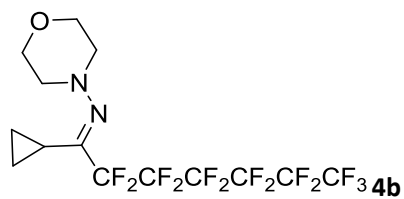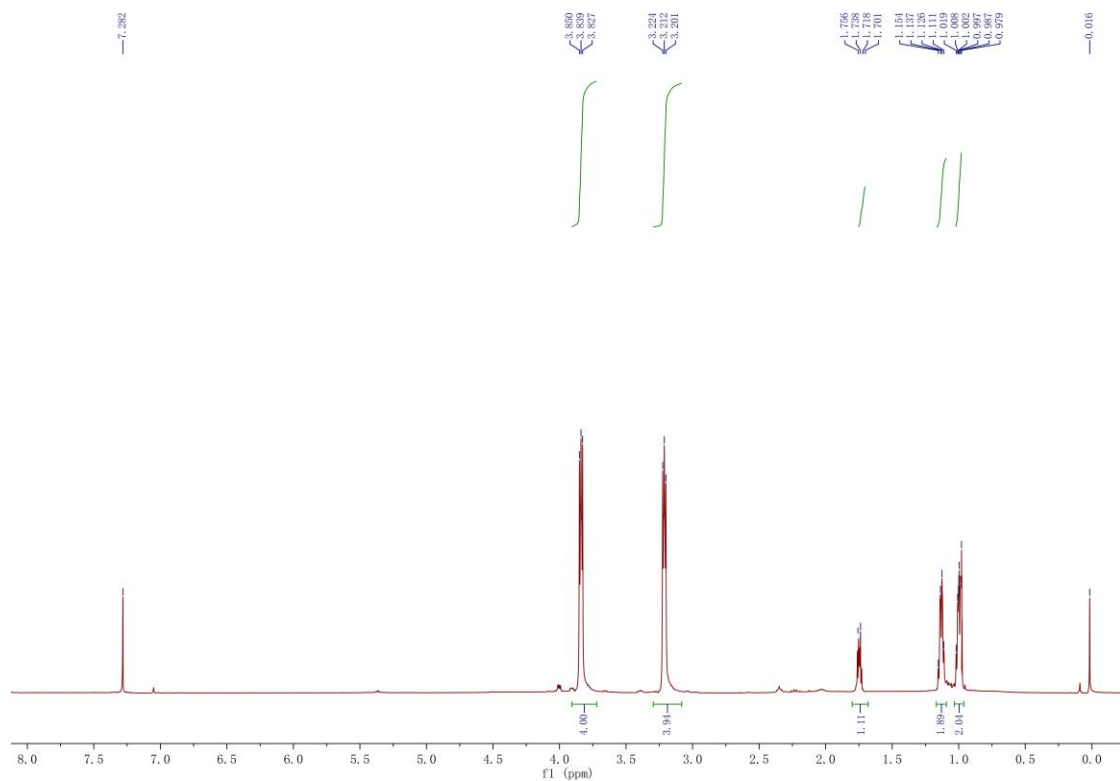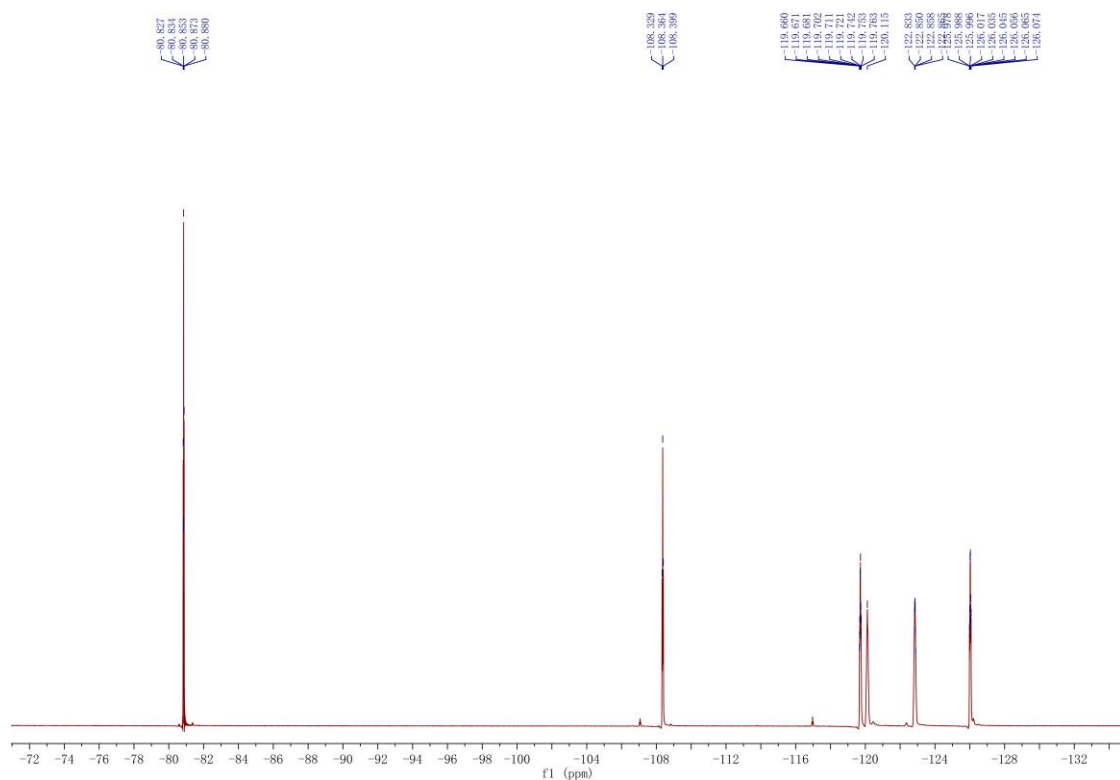

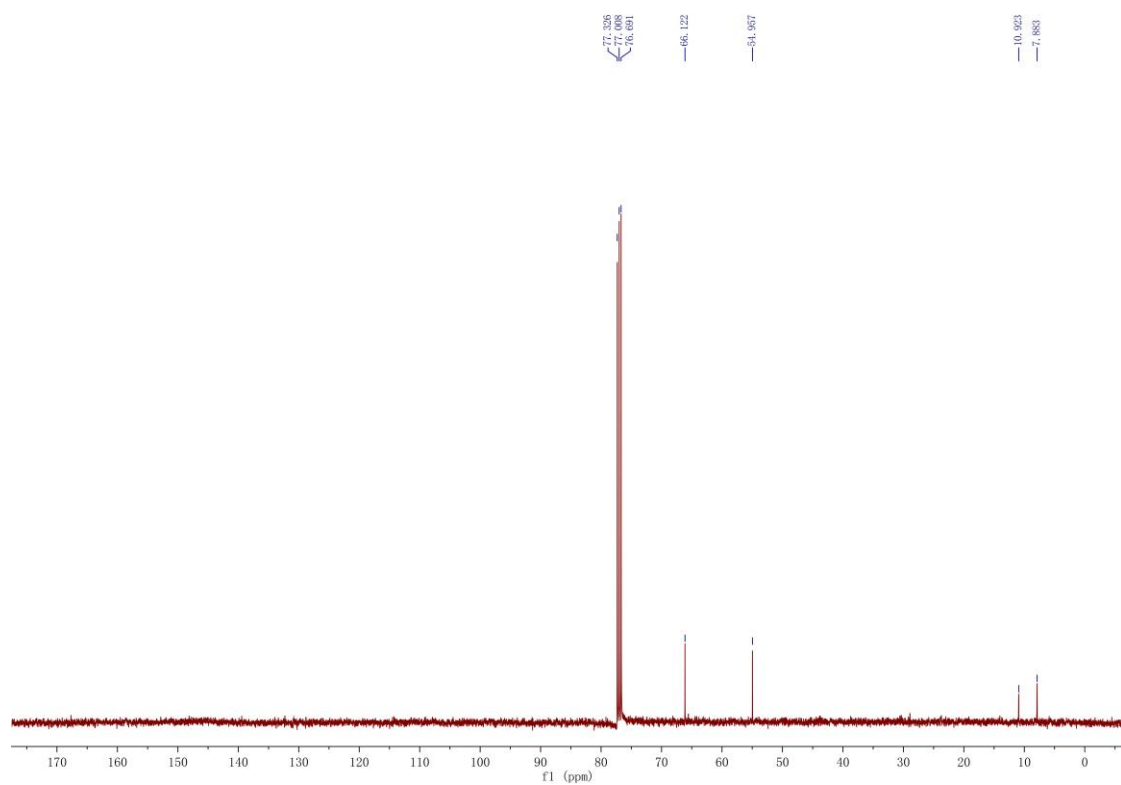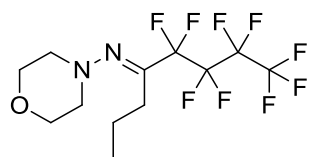

5

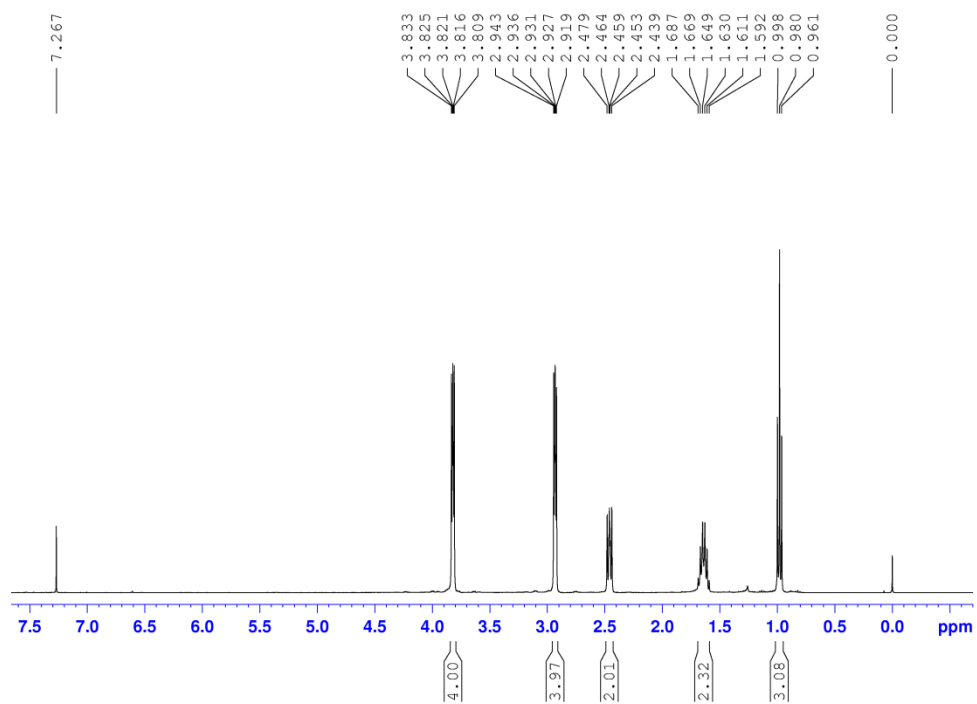

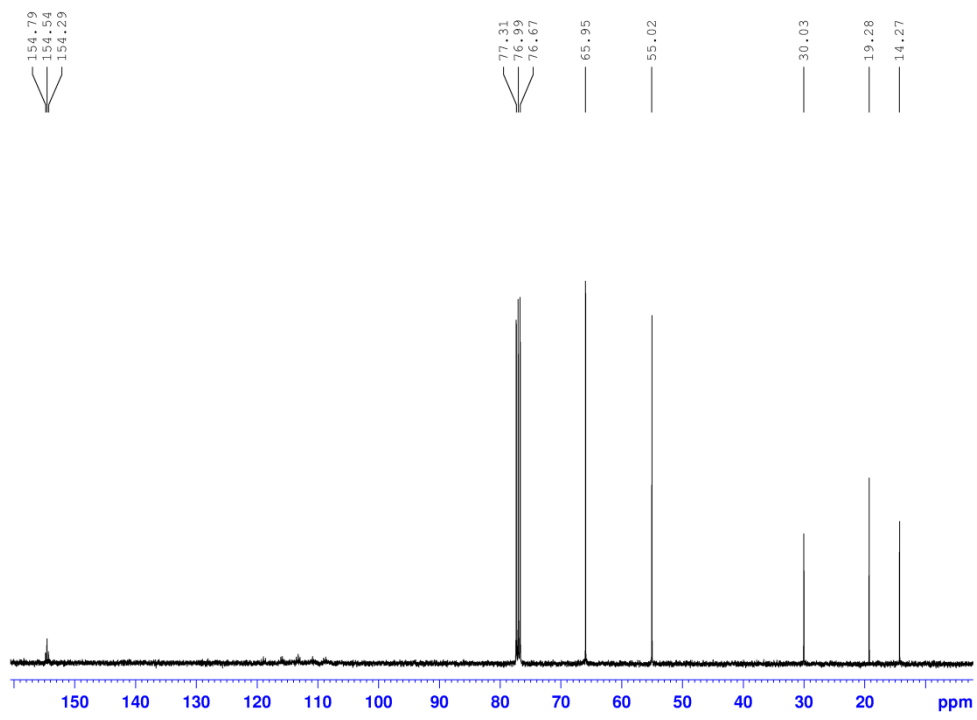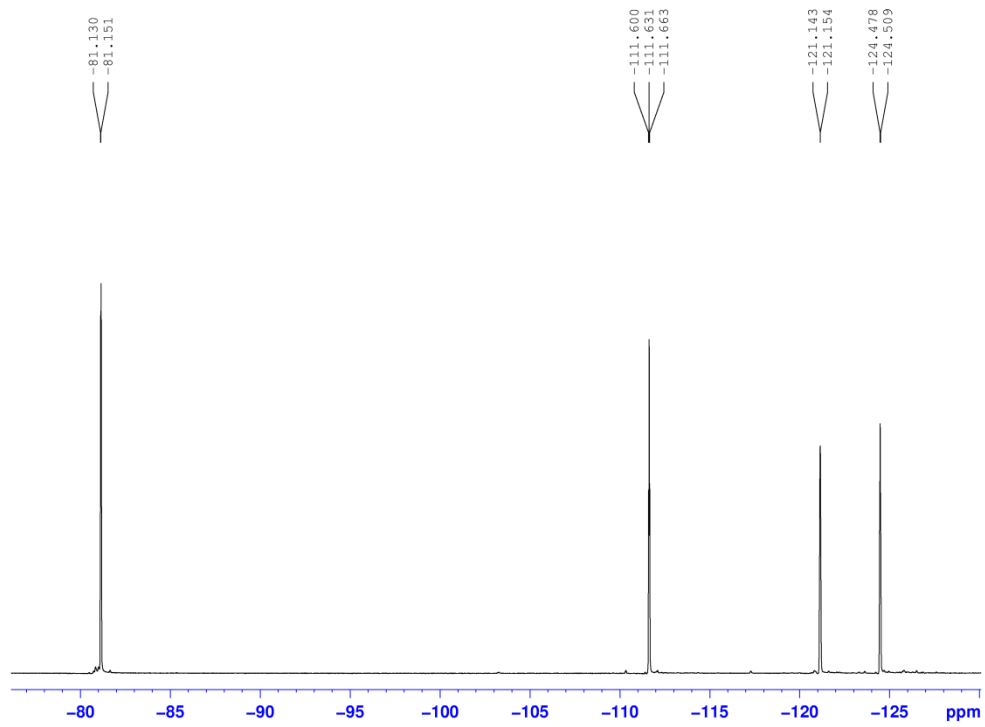



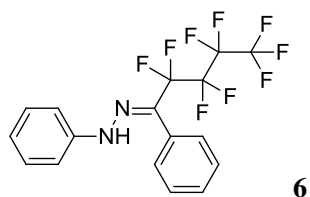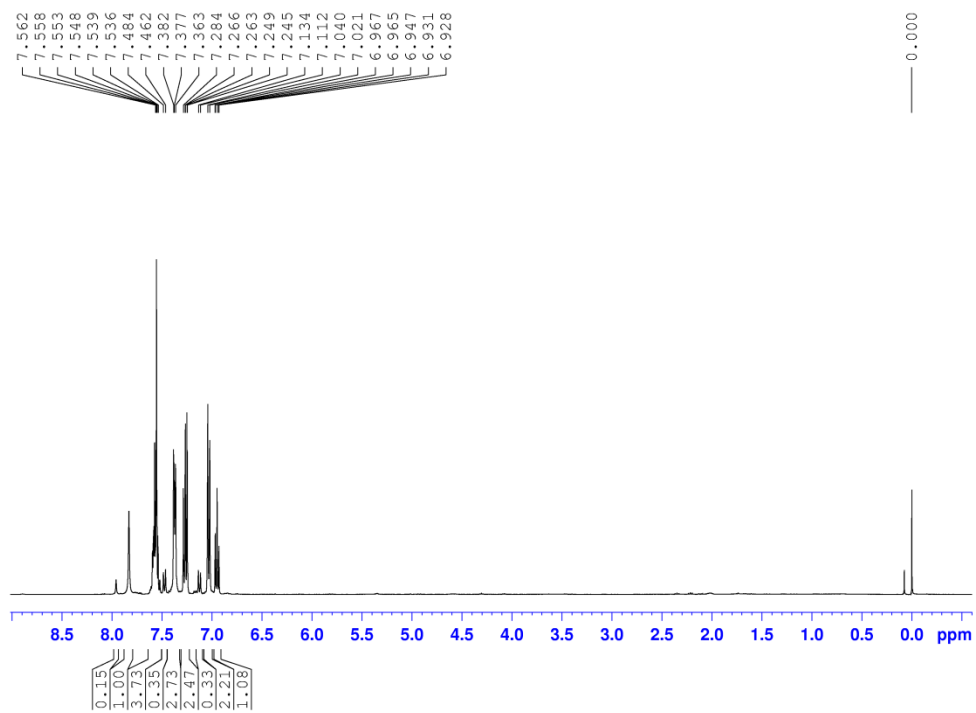

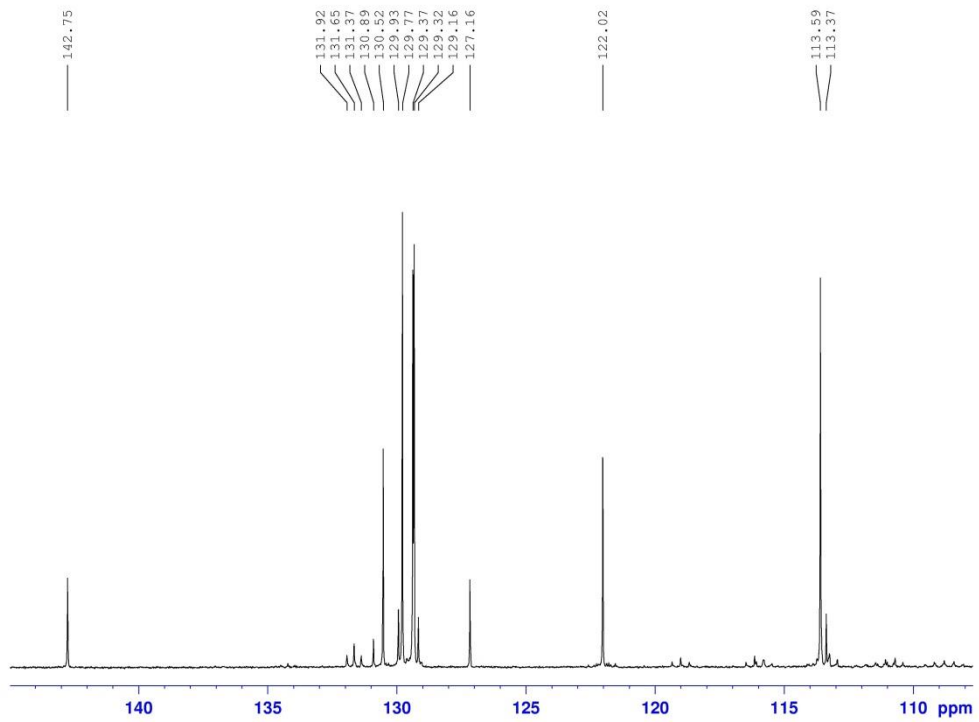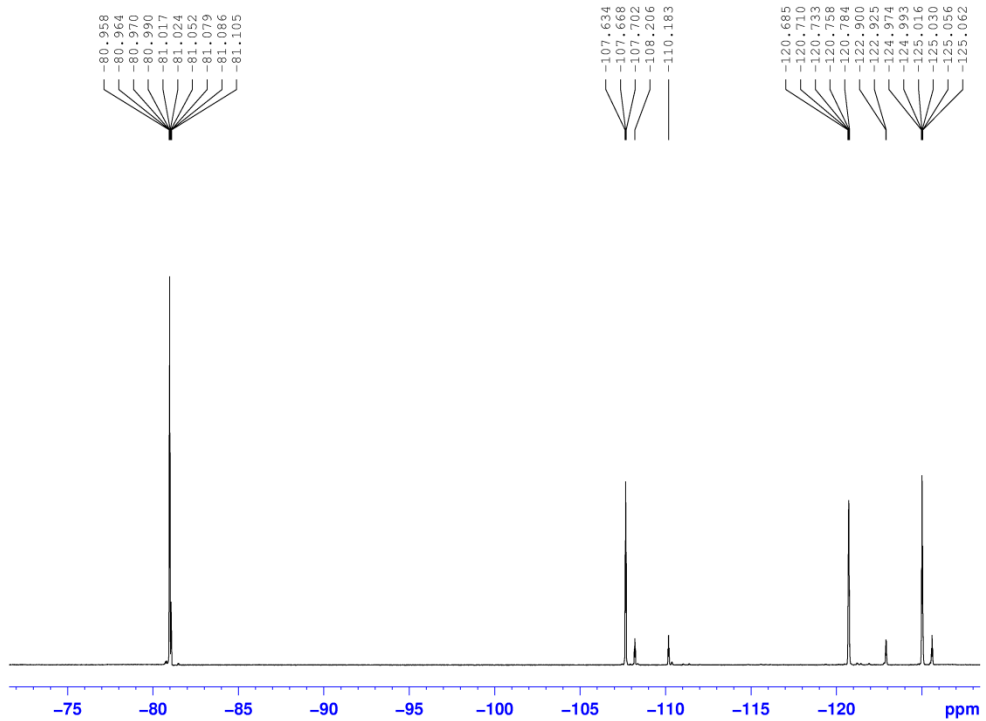

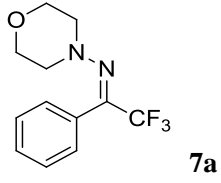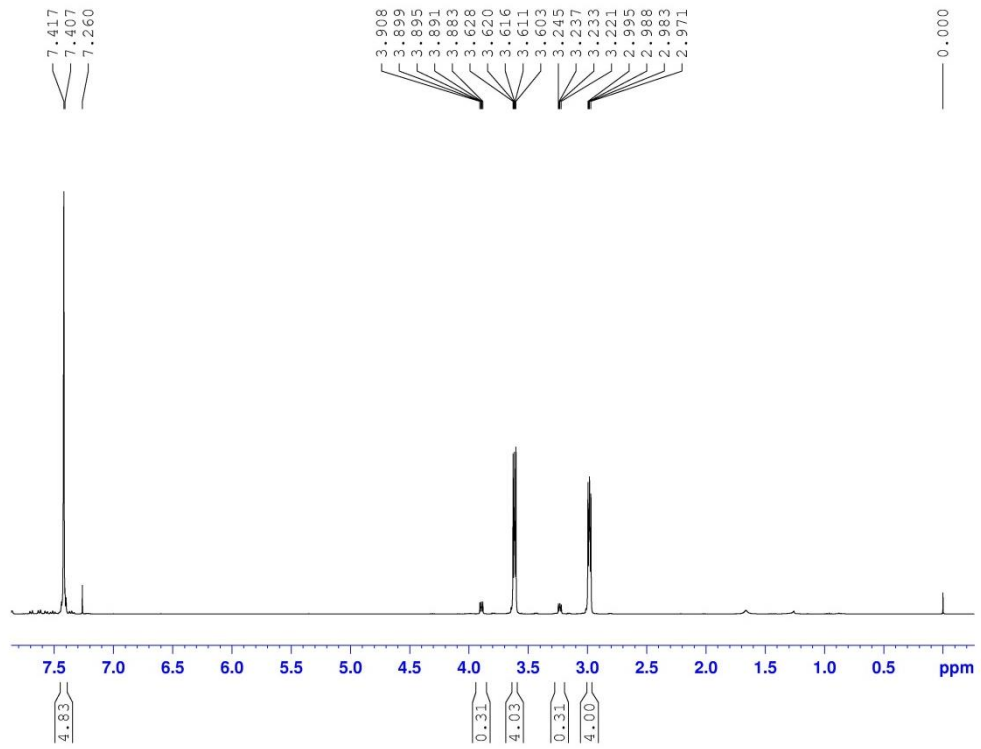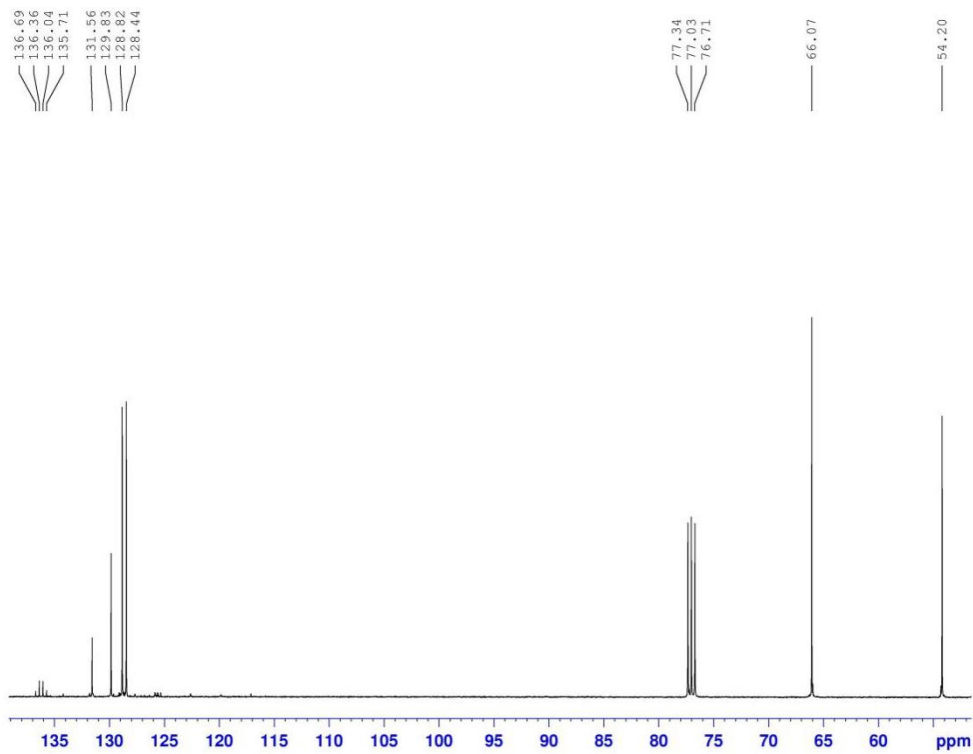

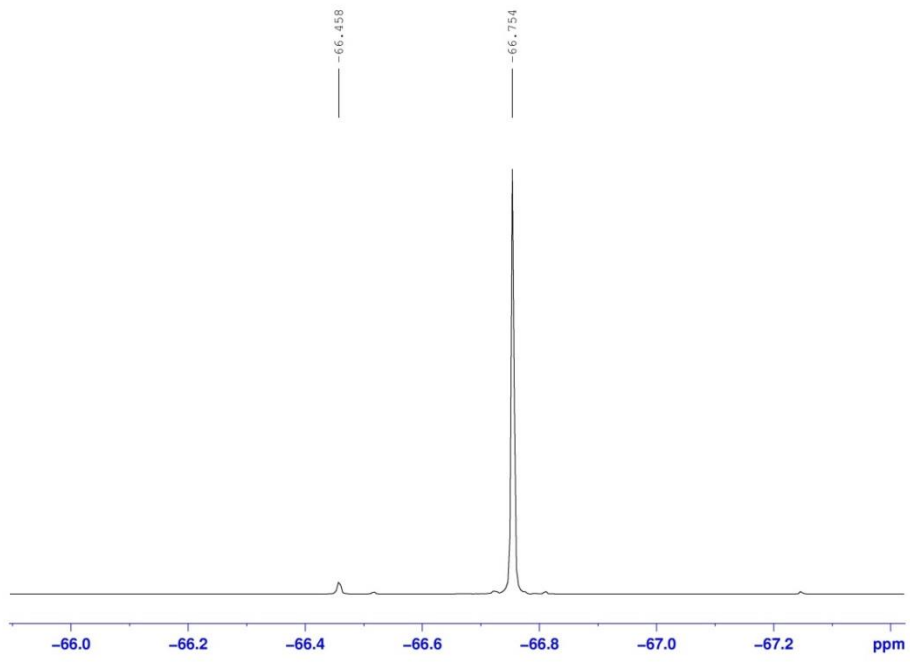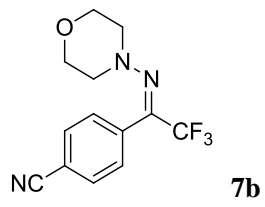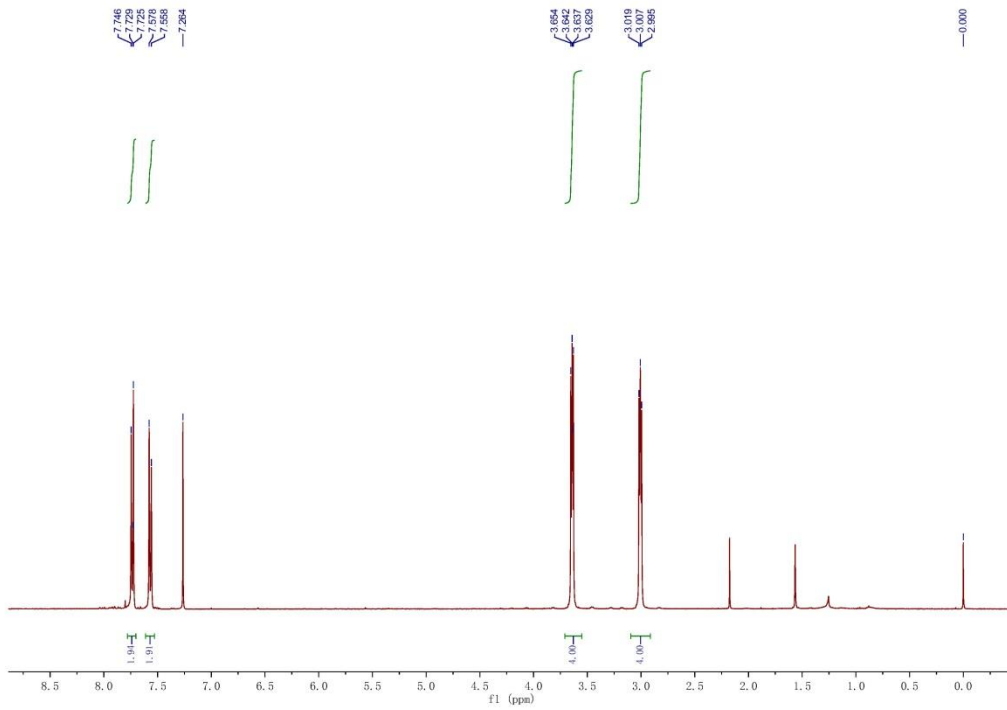

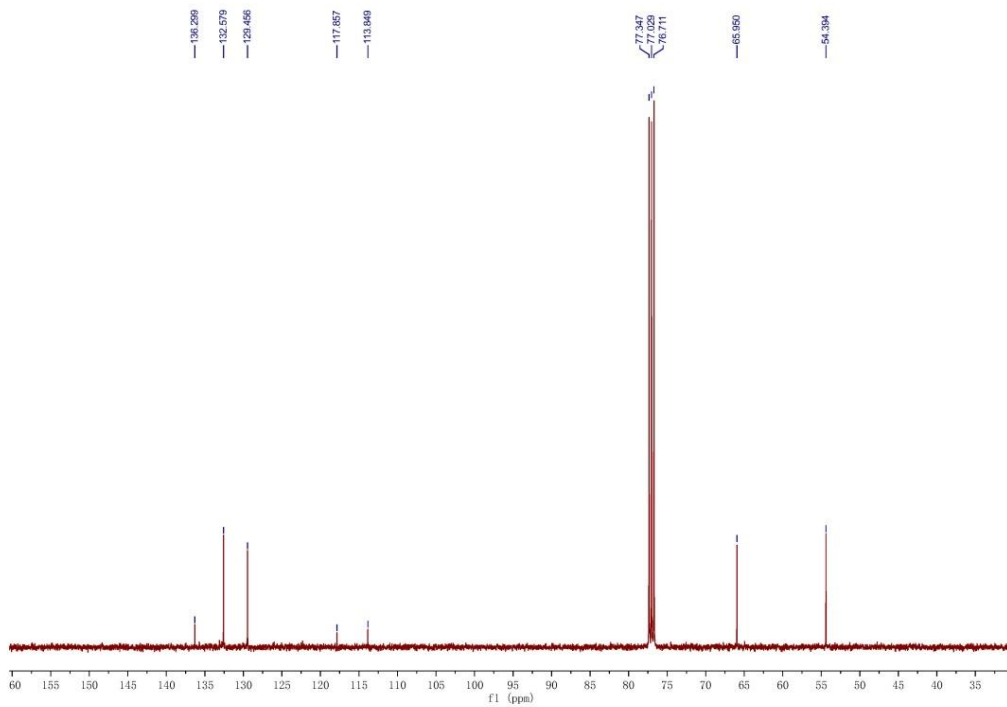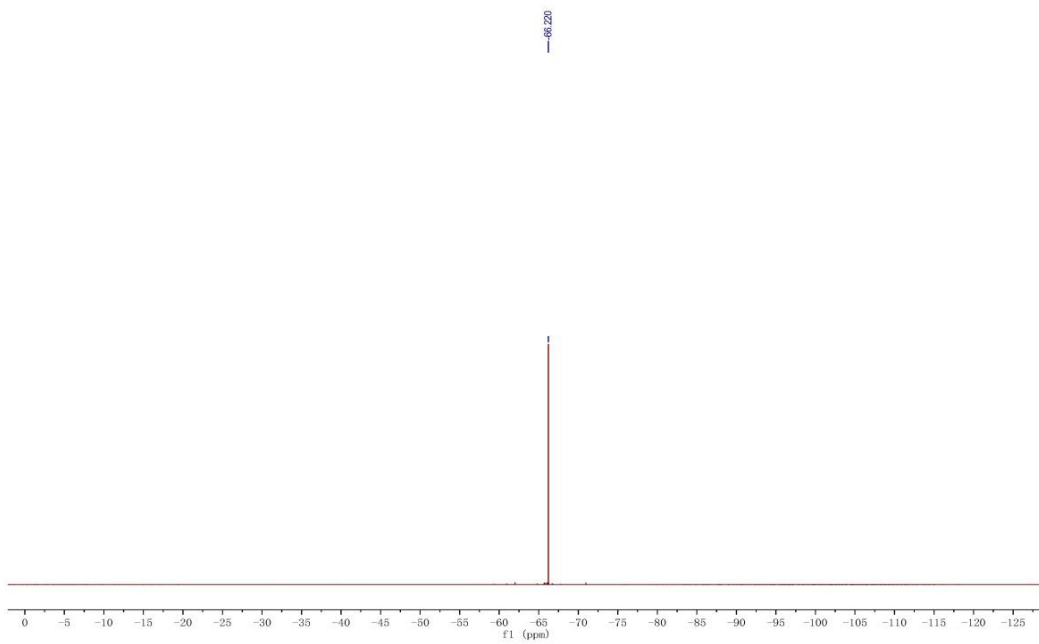

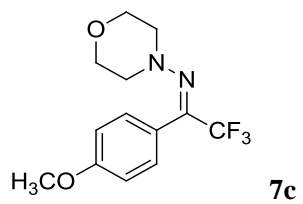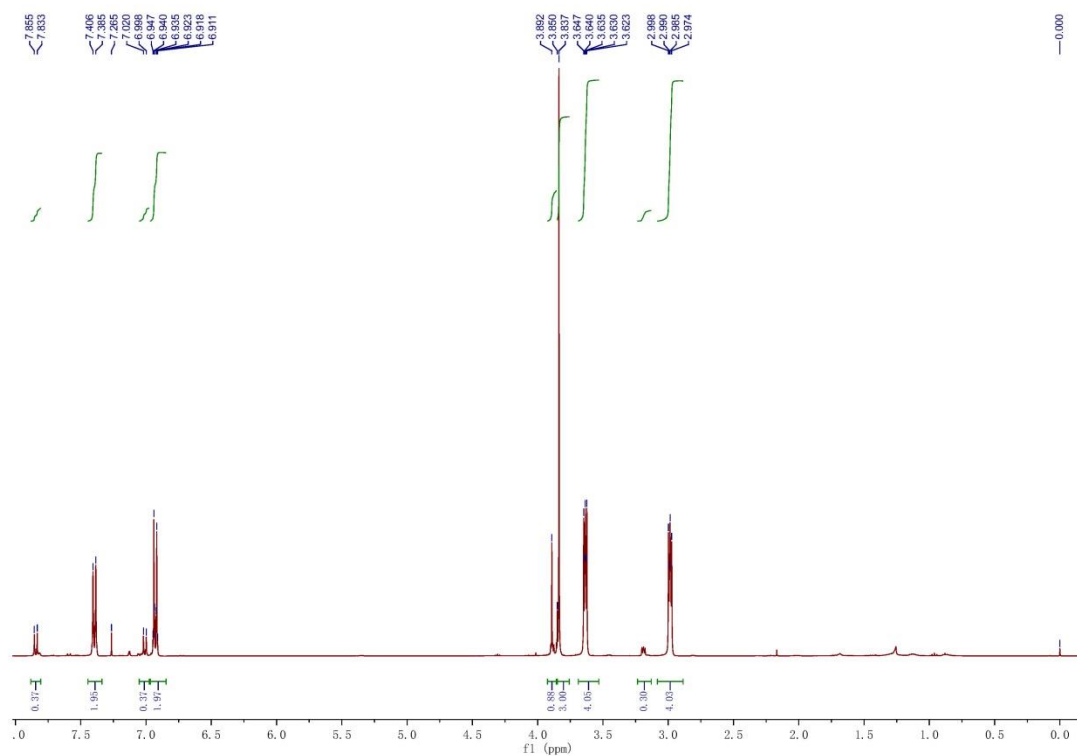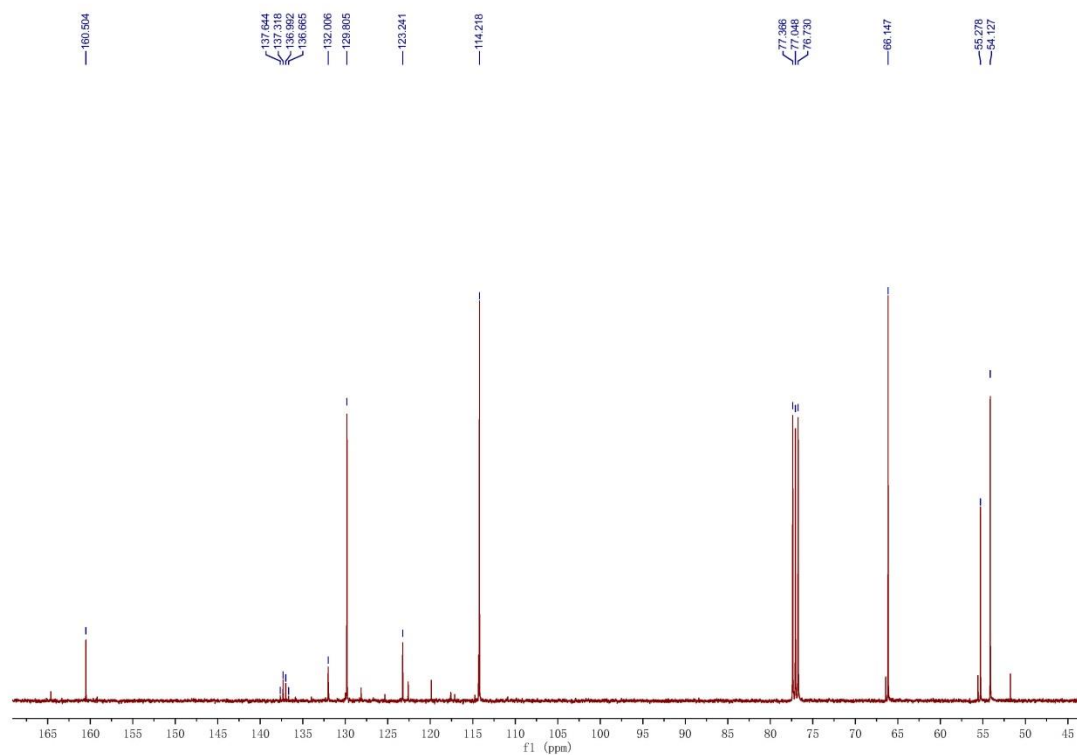

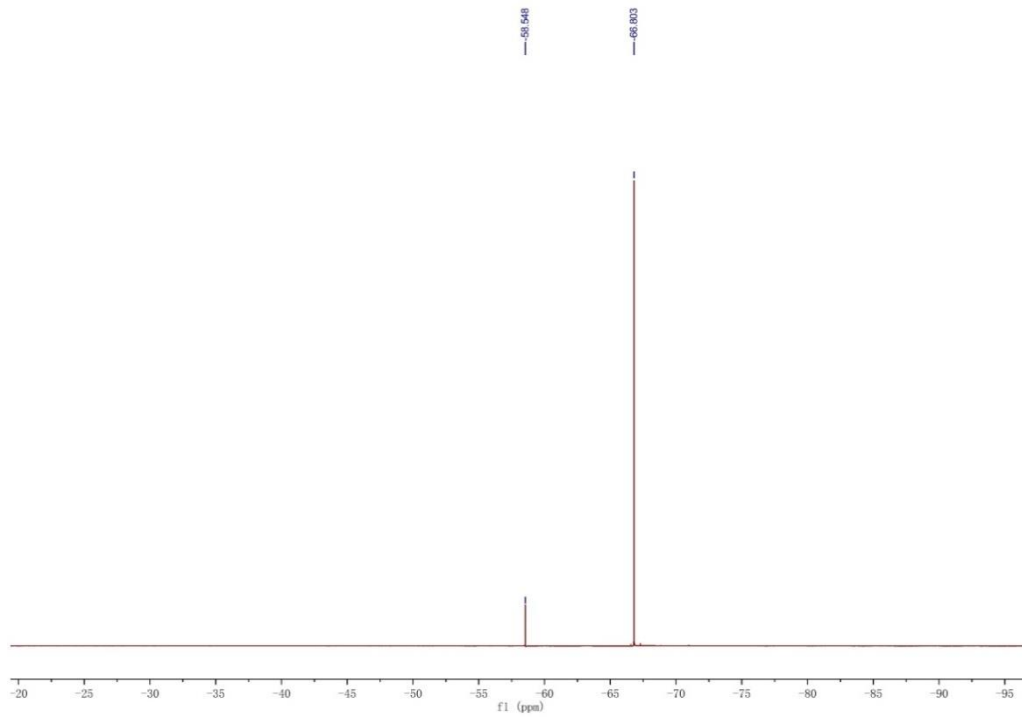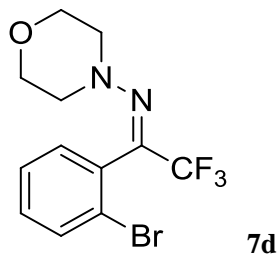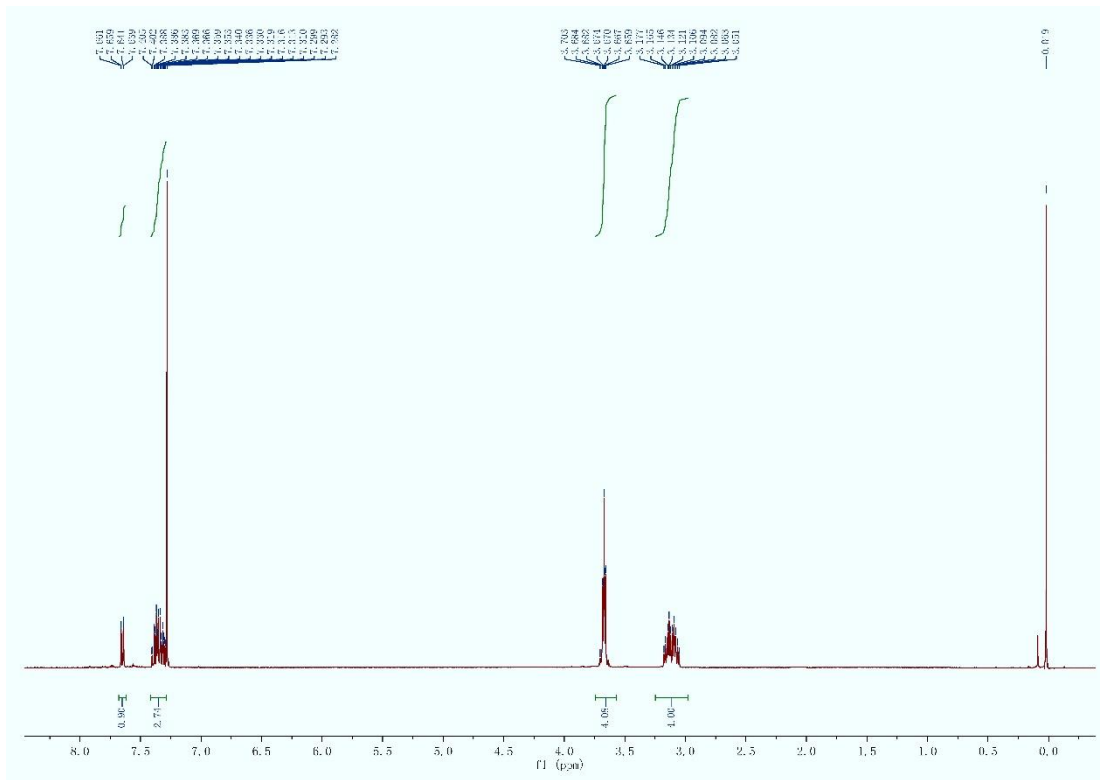

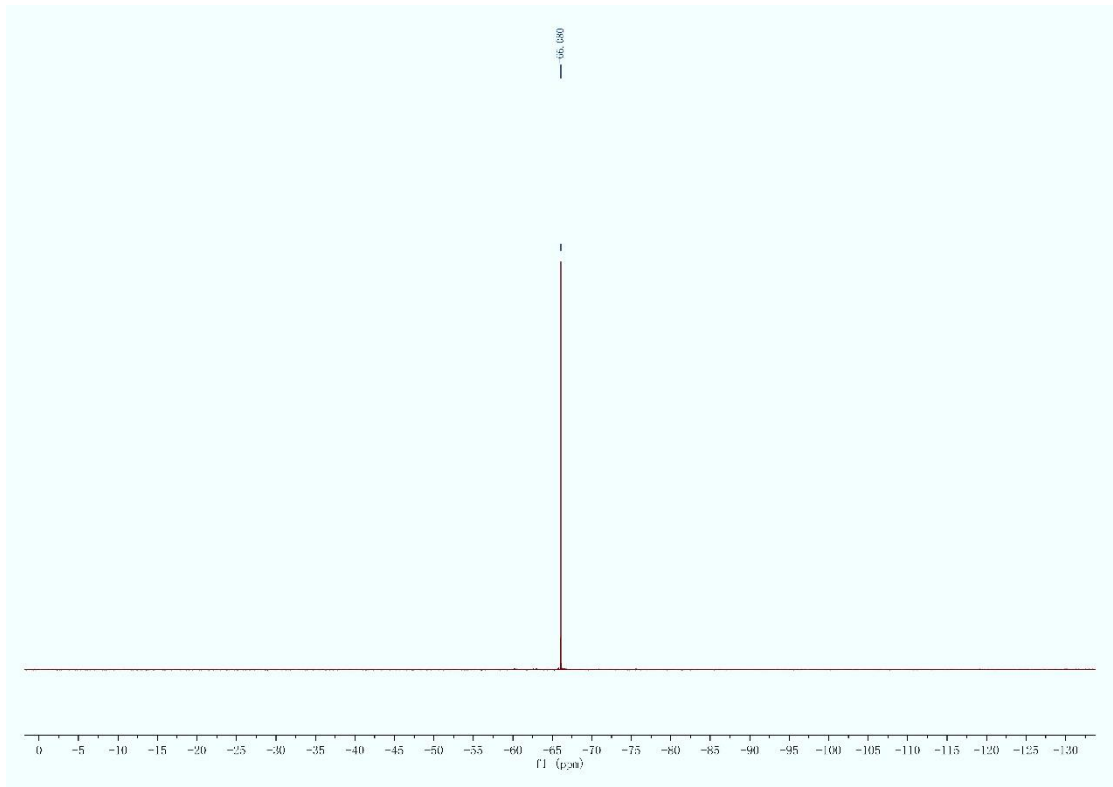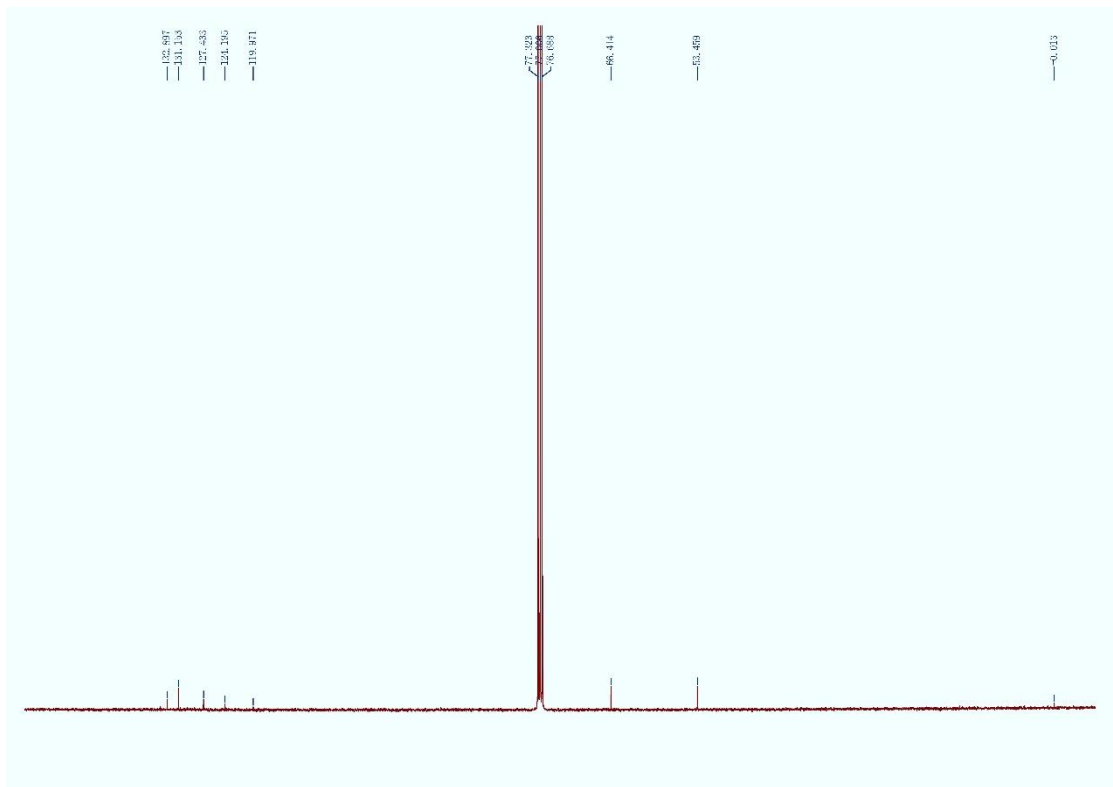



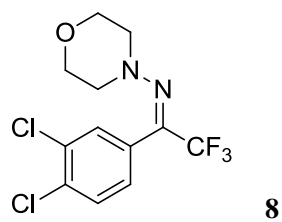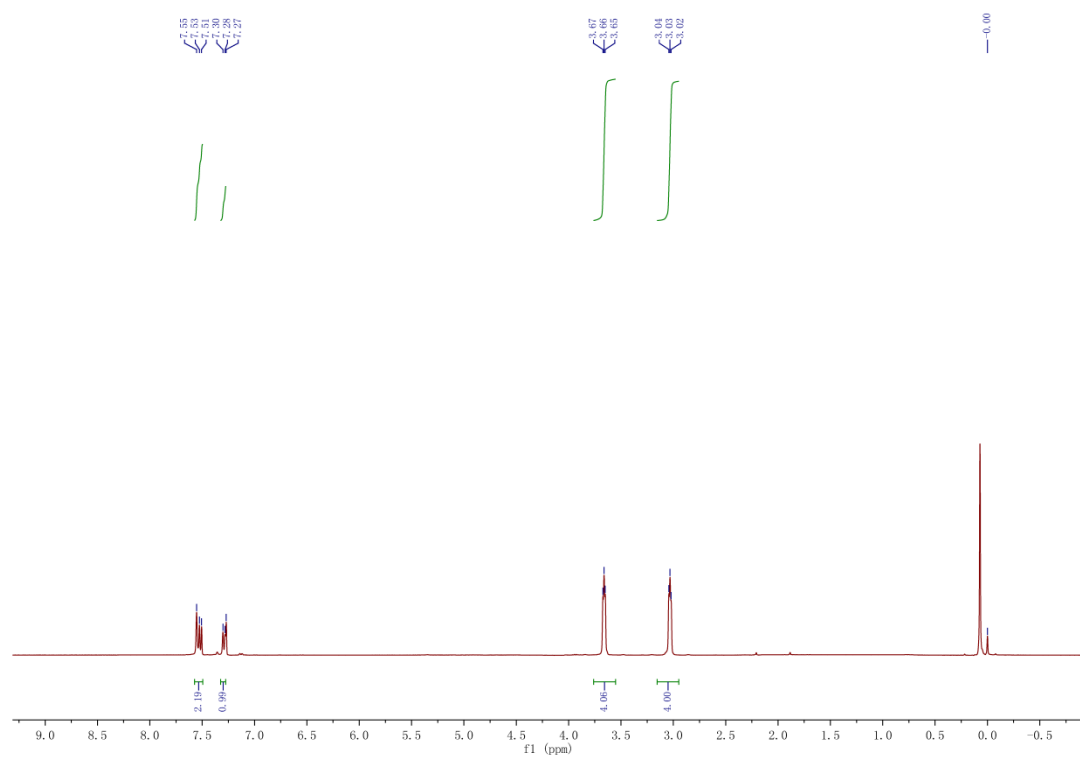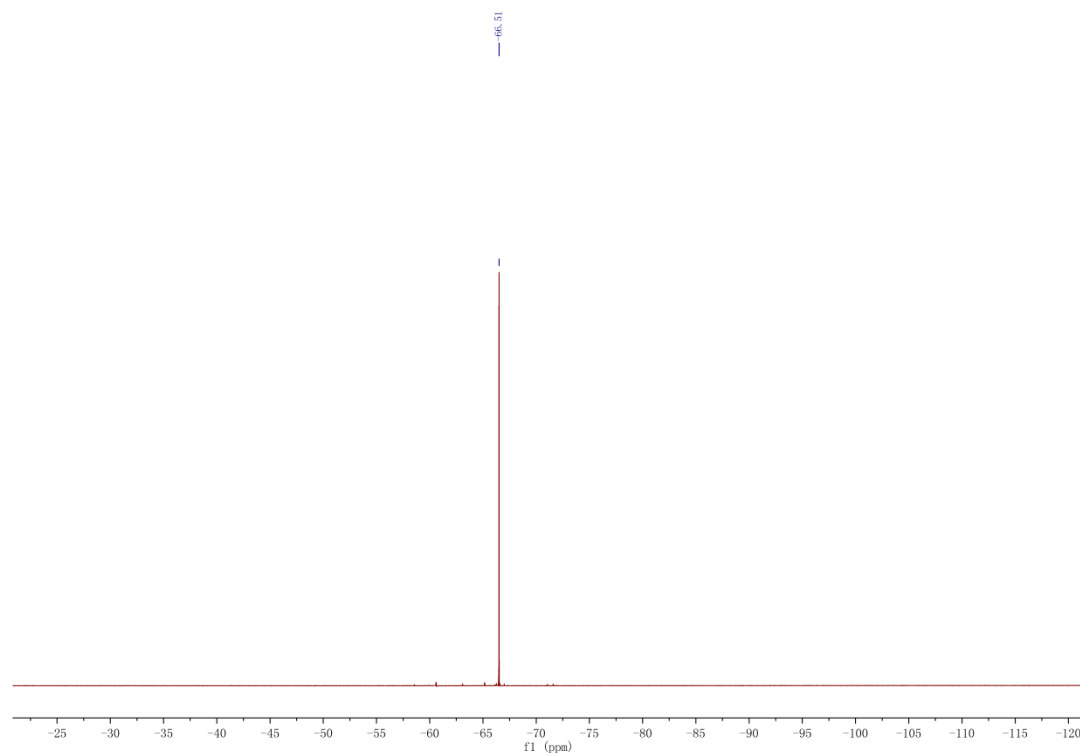

170316-4788-JH-C-2CL

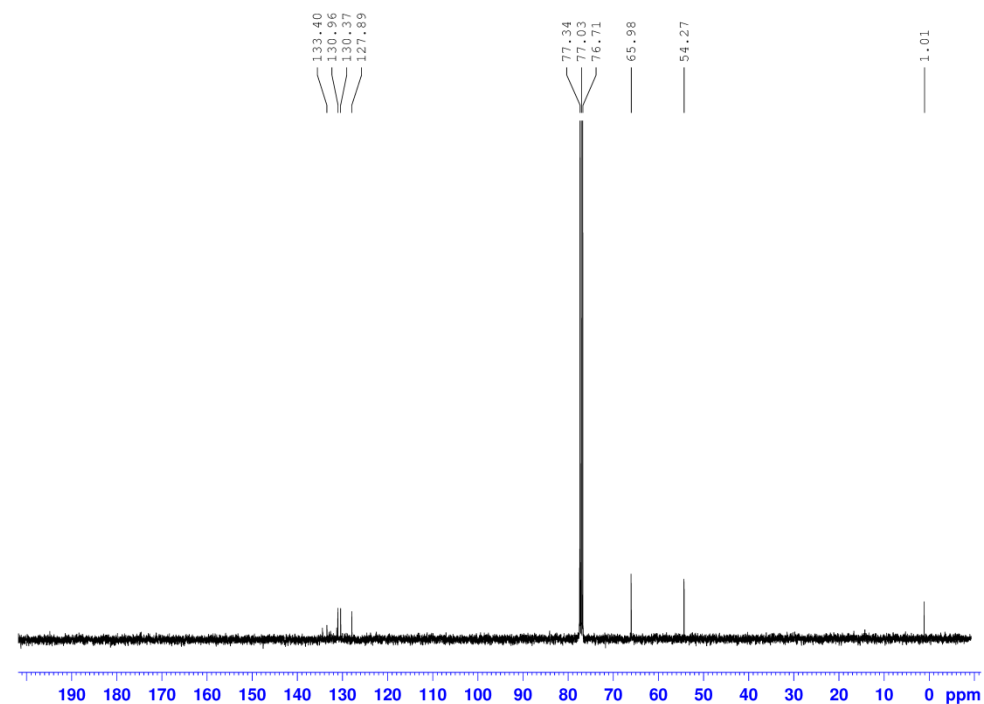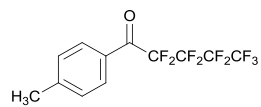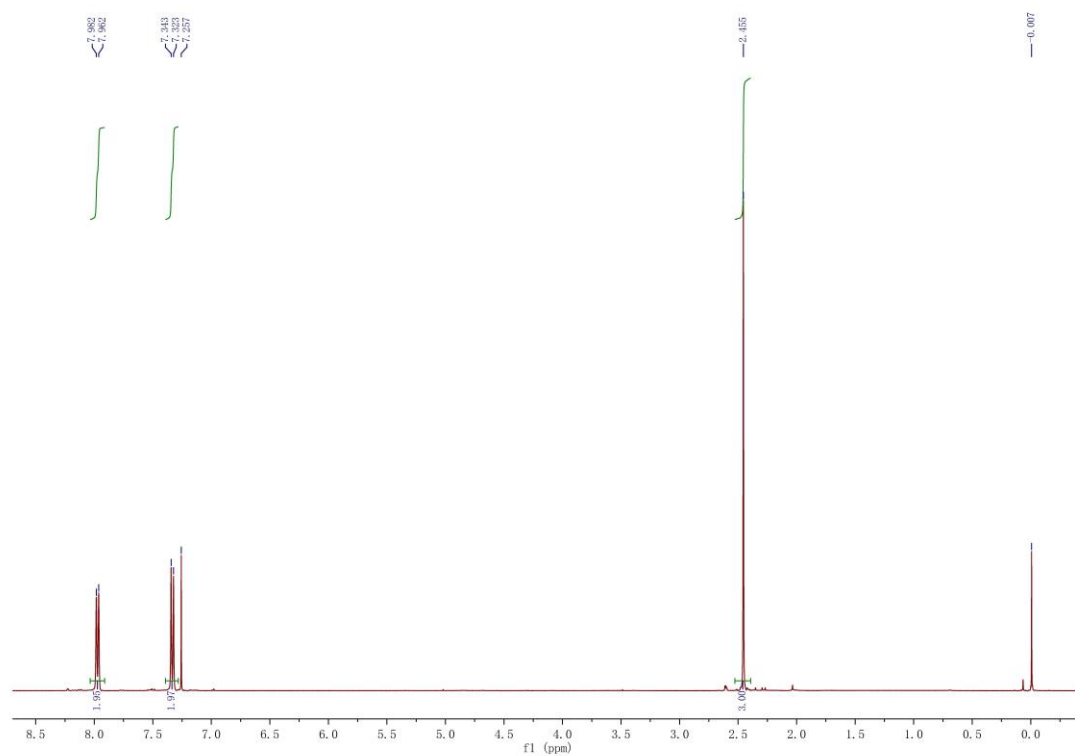

170606  
170606-216-shuijie

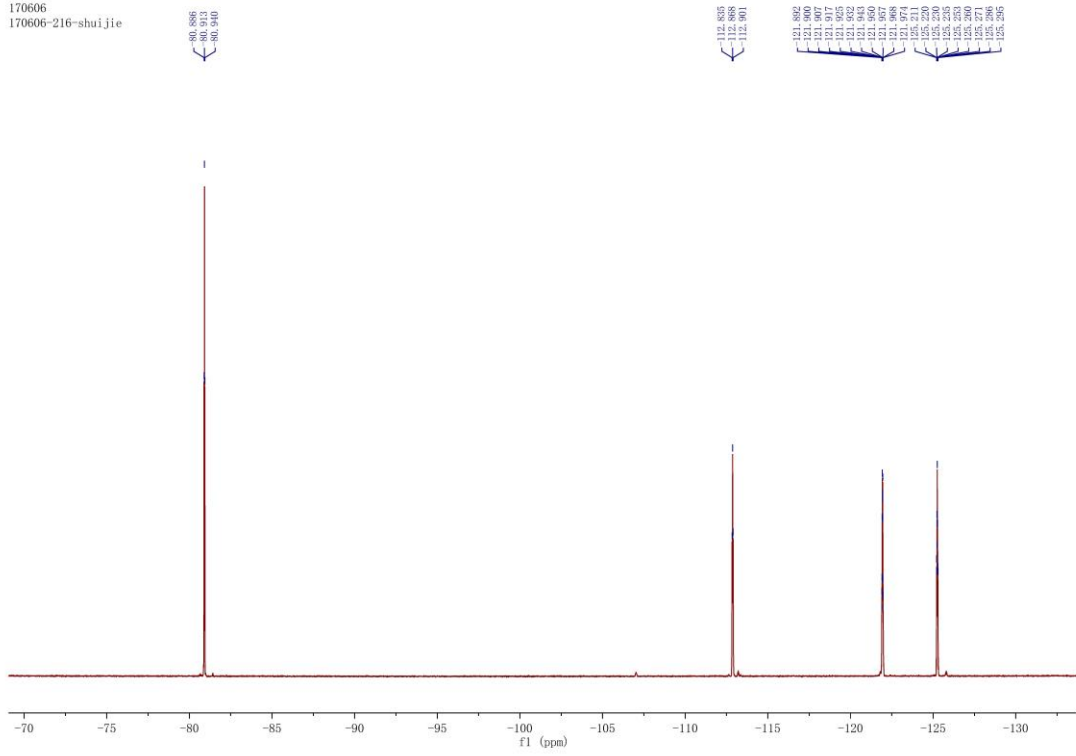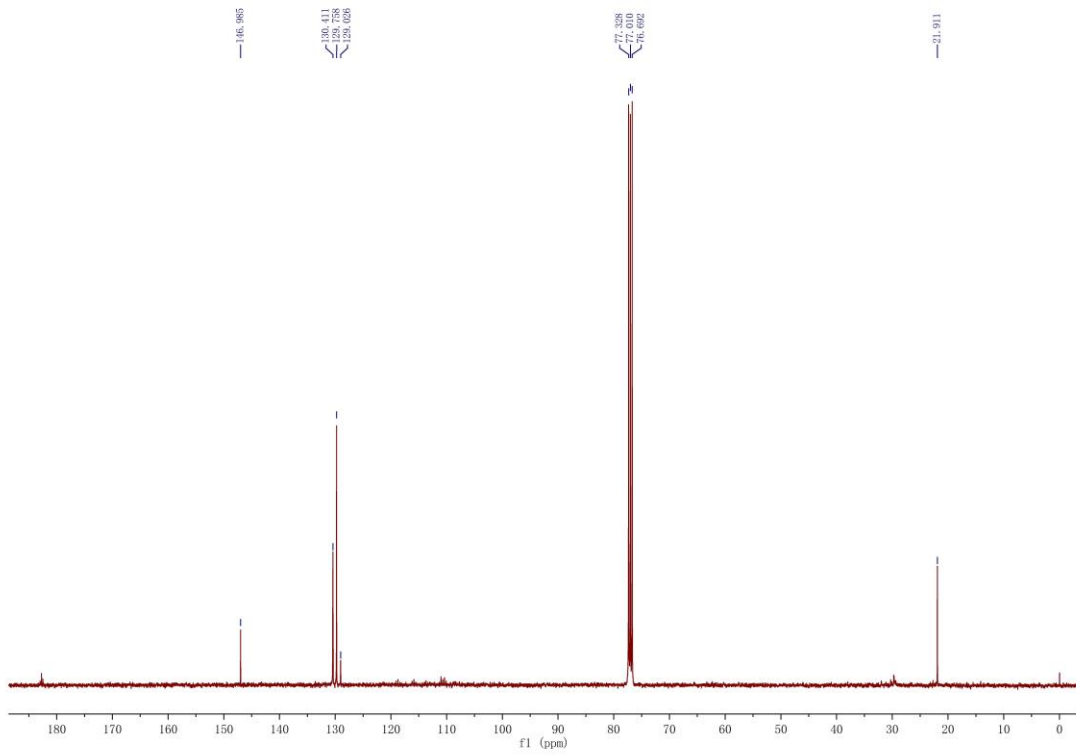

Supplement: c7ob01144j1.pdf [file c7ob01144j1.pdf]
